# Supplementary material for: Electrochemically promoted diamidation of alkenes to dihydroimidazole skeleton
Source: Royal Society of Chemistry journal article supplement (doi:10.1039/d4qo01445f), 2024-01-01
Supplement: d4qo01445f1.pdf [file d4qo01445f1.pdf]

## Supplementary information

### Electrochemically Promoted Diamidation of Alkenes to

### Dihydroimidazole Skeleton

Guo-Ao Wang, Kai-Wei Chen, Yu-Da Huang, Yu-Yuan Zhang, Xiu-Jin Meng\*, Fei-Hu Cui\*, Ying-Ming Pan, Hai-Tao Tang\*

State Key Laboratory for Chemistry and Molecular Engineering of Medicinal Resources, Key Laboratory for Chemistry and Molecular Engineering of Medicinal Resources (Ministry of Education of China), Collaborative Innovation Center for Guangxi Ethnic Medicine, School of Chemistry and Pharmaceutical Sciences, Guangxi Normal University, Guilin 541004, People's Republic of China.

E-mail: xiujinmeng@ mailbox.gxnu.edu.cn; cuifeihuhao@163.com;  
httang@gxnu.edu.cn

## Table of Contents

|                                                                               |    |
|-------------------------------------------------------------------------------|----|
| 1. General Information .....                                                  | 3  |
| 2. Additional Optimization of Reaction Conditions .....                       | 4  |
| 3. General procedure for the preparation of products.....                     | 6  |
| 4. Control experiments .....                                                  | 7  |
| 4.1 TEMPO and BHT trapped experiment .....                                    | 7  |
| 4.2 H <sub>2</sub> <sup>18</sup> O-labeling experiment.....                   | 8  |
| 4.3 Radical clock experiments .....                                           | 9  |
| 5. Electrochemical applications .....                                         | 11 |
| 5.1 Preparation of gram - scale reactions.....                                | 11 |
| 5.2 Dihydroimidazole hydrolysis .....                                         | 12 |
| 5.3 Dihydroimidazole-modified amino acids.....                                | 13 |
| 6. Cyclic Voltammetry Studies .....                                           | 14 |
| 7. Characterization Data for the Products.....                                | 15 |
| 8. Single-Crystal X-Ray Diffraction.....                                      | 29 |
| 9. Copies of <sup>1</sup> H NMR and <sup>13</sup> C NMR for the Products..... | 32 |
| 10. Reference.....                                                            | 72 |

## 1. General Information

Without special instructions, all reagents and solvents were commercially available and were not further purified. All commercially available compounds are purchased from Bide Pharmaceuticals, Et<sub>4</sub>NBF<sub>4</sub> purchased from Aladdin, Extra dry CH<sub>3</sub>CN purchased from Energy chemical, alkenes were synthesized according to the published procedures.<sup>1</sup> Column chromatography on silica gel (300-400 mesh) was carried out using technical grade 60-90 °C petroleum ether (distilled prior to use) and analytical grade EtOAc (without further purification). NMR spectroscopy was performed on 400 MHz or 500 MHz instruments. Chemical shifts for <sup>1</sup>H NMR spectra are reported as  $\delta$  in units of parts per million (ppm) downfield from TMS ( $\delta$  0.00) and relative to the signal of chloroform-d ( $\delta$  7.26, singlet). The abbreviations used to explain the multiplicities were as follows: s, singlet; d, doublet; t, triplet; m, multiplet; brs, broad singlet and J, coupling constant in Hz. <sup>13</sup>C NMR spectra are reported as  $\delta$  in units of parts per million (ppm) downfield from TMS ( $\delta$  0.00) and relative to the signal of chloroform-d ( $\delta$  77.16, triplet). The HRMS spectrum was measured by micromass QTOF2 Quadrupole/Time of Flight Tandem mass spectrometer with electron spray ionization. Cyclic voltammograms were recorded on a CHI 660E potentiostat. Single-crystal X-ray diffraction data were collected on a Rigaku XtaLAB Synergy, Dualflex, Rigaku XtaLAB Synergy-S diffractometer coupled to a Rigaku Hypix detector with Cu K $\alpha$  radiation ( $\lambda = 1.54184 \text{ \AA}$ ). The crystal was kept at a steady T = 100 K during the data collection. The structures were solved with the SHELXT solution program by using Olex 2 (Dolomanov et al., 2009) as the graphical interface. The model was refined using Least Squares minimisation with the 2018/3 version of the program SHELXL.

## 2. Additional Optimization of Reaction Conditions

Table S1 Optimization of reaction conditions <sup>a</sup>

undivided cell, rt.  
CH<sub>3</sub>CN/H<sub>2</sub>O

| Entry           | Electrode            | Electrolyte                               | Current (mA) | Extra dry <sup>h</sup><br>CH <sub>3</sub> CN (mL) | Yield (%) <sup>b</sup> |
|-----------------|----------------------|-------------------------------------------|--------------|---------------------------------------------------|------------------------|
| 1               | GF (+)   GF (-)      | Et <sub>4</sub> NBr (2 eq.)               | 8            | 4                                                 | Trace                  |
| 2               | GF (+)   GF (-)      | Et <sub>4</sub> NCl (2 eq.)               | 8            | 4                                                 | Trace                  |
| 3               | GF (+)   GF (-)      | Et <sub>4</sub> NI (2 eq.)                | 8            | 4                                                 | Trace                  |
| 4               | GF (+)   GF (-)      | Et <sub>4</sub> NBF <sub>4</sub> (2 eq.)  | 8            | 4                                                 | 25                     |
| 5               | GF (+)   GF (-)      | Et <sub>4</sub> NClO <sub>4</sub> (2 eq.) | 8            | 4                                                 | 21                     |
| 6               | GF (+)   GF (-)      | Et <sub>4</sub> NPF <sub>6</sub> (2 eq.)  | 8            | 4                                                 | 20                     |
| 7               | GF (+)   GF (-)      | Et <sub>4</sub> NBF <sub>4</sub> (1 eq.)  | 8            | 4                                                 | 23                     |
| 8               | GF (+)   GF (-)      | Et <sub>4</sub> NBF <sub>4</sub> (3 eq.)  | 8            | 4                                                 | 34                     |
| 9               | GF (+)   GF (-)      | Et <sub>4</sub> NBF <sub>4</sub> (4 eq.)  | 8            | 4                                                 | 43                     |
| 10              | GF (+)   GF (-)      | Et <sub>4</sub> NBF <sub>4</sub> (5 eq.)  | 8            | 4                                                 | 36                     |
| 11              | GF (+)   GF (-)      | Et <sub>4</sub> NBF <sub>4</sub> (4 eq.)  | 8            | 2                                                 | 34                     |
| 12              | GF (+)   GF (-)      | Et <sub>4</sub> NBF <sub>4</sub> (4 eq.)  | 8            | 6                                                 | 51                     |
| 13              | GF (+)   GF (-)      | Et <sub>4</sub> NBF <sub>4</sub> (4 eq.)  | 8            | 8                                                 | 43                     |
| 14              | RVC (+)   GF (-)     | Et <sub>4</sub> NBF <sub>4</sub> (4 eq.)  | 8            | 6                                                 | 52                     |
| 15              | RVC (+)   Ni (-)     | Et <sub>4</sub> NBF <sub>4</sub> (4 eq.)  | 8            | 6                                                 | 61                     |
| 16              | Pt (+)   Pt (-)      | Et <sub>4</sub> NBF <sub>4</sub> (4 eq.)  | 8            | 6                                                 | 59                     |
| 17              | C (+)   C (-)        | Et <sub>4</sub> NBF <sub>4</sub> (4 eq.)  | 8            | 6                                                 | 35                     |
| 18              | RVC (+)   Ni foam    | Et <sub>4</sub> NBF <sub>4</sub> (4 eq.)  | 8            | 6                                                 | 70                     |
| 19              | RVC (+)   Pt (-)     | Et <sub>4</sub> NBF <sub>4</sub> (4 eq.)  | 8            | 6                                                 | 68                     |
| 20              | GF (+)   RVC (-)     | Et <sub>4</sub> NBF <sub>4</sub> (4 eq.)  | 8            | 6                                                 | 45                     |
| 21              | GF (+)   C Paper (-) | Et <sub>4</sub> NBF <sub>4</sub> (4 eq.)  | 8            | 6                                                 | 43                     |
| 22              | GF (+)   C Cloth (-) | Et <sub>4</sub> NBF <sub>4</sub> (4 eq.)  | 8            | 6                                                 | 38                     |
| 23              | RVC (+)   RVC (-)    | Et <sub>4</sub> NBF <sub>4</sub> (4 eq.)  | 8            | 6                                                 | 50                     |
| 24              | Pt (-)   Ni foam (-) | Et <sub>4</sub> NBF <sub>4</sub> (4 eq.)  | 8            | 6                                                 | 58                     |
| 25              | RVC (+)   Ni foam    | Et <sub>4</sub> NBF <sub>4</sub> (4 eq.)  | 6            | 6                                                 | 62                     |
| 26              | RVC (+)   Ni foam    | Et <sub>4</sub> NBF <sub>4</sub> (4 eq.)  | 10           | 6                                                 | 64                     |
| 27              | RVC (+)   Ni foam    | Et <sub>4</sub> NBF <sub>4</sub> (4 eq.)  | 0            | 6                                                 | 0                      |
| 28 <sup>c</sup> | RVC (+)   Ni foam    | Et <sub>4</sub> NBF <sub>4</sub> (4 eq.)  | 8            | 6:0.005                                           | 82                     |
| 29 <sup>d</sup> | RVC (+)   Ni foam    | Et <sub>4</sub> NBF <sub>4</sub> (4 eq.)  | 8            | 6:0.02                                            | 65                     |
| 30 <sup>e</sup> | RVC (+)   Ni foam    | Et <sub>4</sub> NBF <sub>4</sub> (4 eq.)  | 8            | 6:0.04                                            | 42                     |

|                 |                   |                                          |   |       |       |
|-----------------|-------------------|------------------------------------------|---|-------|-------|
| 31 <sup>f</sup> | RVC (+)   Ni foam | Et <sub>4</sub> NBF <sub>4</sub> (4 eq.) | 8 | 6:0.1 | 25    |
| 32 <sup>g</sup> | RVC (+)   Ni foam | Et <sub>4</sub> NBF <sub>4</sub> (4 eq.) | 8 | 6:0.2 | trace |

<sup>a</sup> standard conditions: reticulated vitreous carbon (RVC (100 PPI, 1 cm × 1 cm × 1.2 cm)) anode, Ni foam (1 cm × 2 cm × 0.5 cm) cathode, undivided cell, constant current = 8 mA, **1a** (0.2 mmol, 1 equiv), Et<sub>4</sub>NBF<sub>4</sub> (0.8 mmol, 4 equiv), extra dry CH<sub>3</sub>CN and H<sub>2</sub>O as solvent (extra dry CH<sub>3</sub>CN = 6 mL, H<sub>2</sub>O = 5 μL), room temperature, <sup>b</sup> Isolated yields, <sup>c</sup> extra dry CH<sub>3</sub>CN/H<sub>2</sub>O (6:0.005) as solvent (extra dry CH<sub>3</sub>CN = 6 mL, H<sub>2</sub>O = 5 μL), <sup>d</sup> extra dry CH<sub>3</sub>CN/H<sub>2</sub>O (6:0.02) as solvent (extra dry CH<sub>3</sub>CN = 6 mL, H<sub>2</sub>O = 20 μL), <sup>e</sup> extra dry CH<sub>3</sub>CN/H<sub>2</sub>O (6:0.04) as solvent (extra dry CH<sub>3</sub>CN = 6 mL, H<sub>2</sub>O = 40 μL), <sup>f</sup> extra dry CH<sub>3</sub>CN/H<sub>2</sub>O (extra dry 6:0.1) as solvent (extra dry CH<sub>3</sub>CN = 6 mL, H<sub>2</sub>O = 100 μL), <sup>g</sup> extra dry CH<sub>3</sub>CN/H<sub>2</sub>O (6:0.2) as solvent (extra dry CH<sub>3</sub>CN = 6 mL, H<sub>2</sub>O = 200 μL), <sup>h</sup> water ≤10 ppm.

### 3. General procedure for the preparation of products

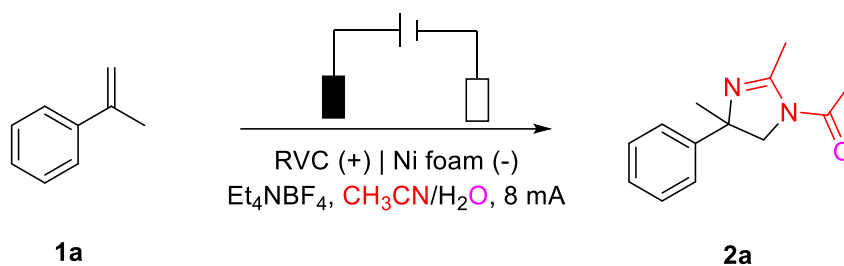

A 10 mL three-necked round-bottomed flask was charged with **1a** (0.2 mmol, 1 equiv), Et<sub>4</sub>NBF<sub>4</sub> (0.8 mmol, 4.0 equiv), extra dry CH<sub>3</sub>CN and H<sub>2</sub>O as solvent (extra dry CH<sub>3</sub>CN = 6 mL, H<sub>2</sub>O = 5 μL). The flask was equipped with a reticulated vitreous carbon (RVC) anode (100 PPI, 1 cm × 1 cm × 1.2 cm) and a Ni foam (1 cm × 2 cm × 0.5 cm) cathode, the distance between the two electrodes was 2.8 cm. Electrolysis was carried out at room temperature under air atmosphere, which using a constant current of 8 mA until the substrate was completely consumed (monitored by TLC, about 3 ~ 6 hours). When the reaction was finished, the reaction mixture was washed with water and extracted with ethyl acetate (3 × 10 mL). The organic layers were combined, dried over Na<sub>2</sub>SO<sub>4</sub>, and concentrated. The pure product was obtained by flash column chromatography on silica gel to afford the **2a**. (petroleum ether/ethyl acetate = 1: 1).

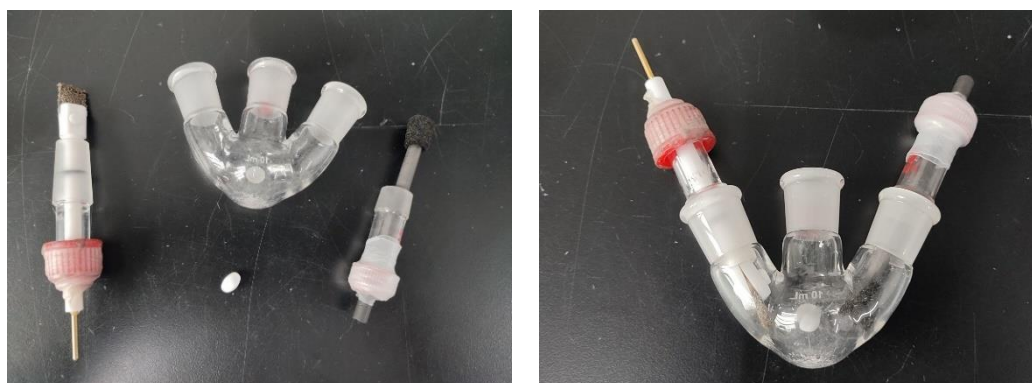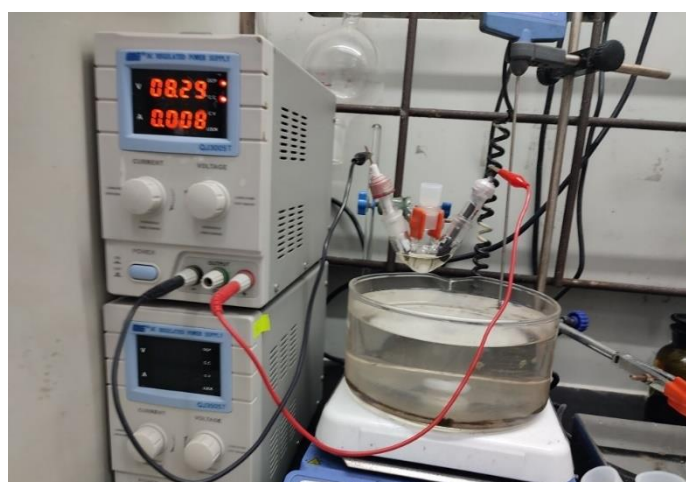

Figure S1 Electrolysis setup

## 4. Control experiments

### 4.1 TEMPO and BHT trapped experiment

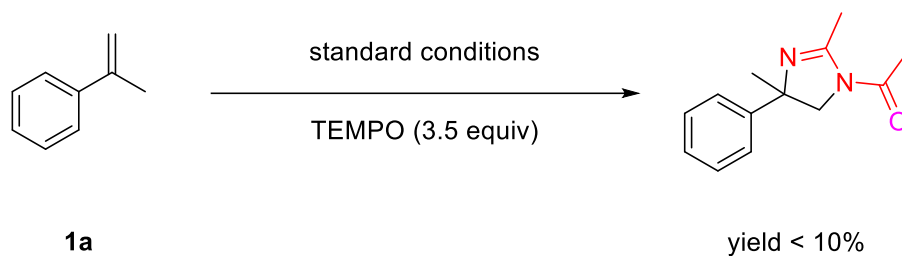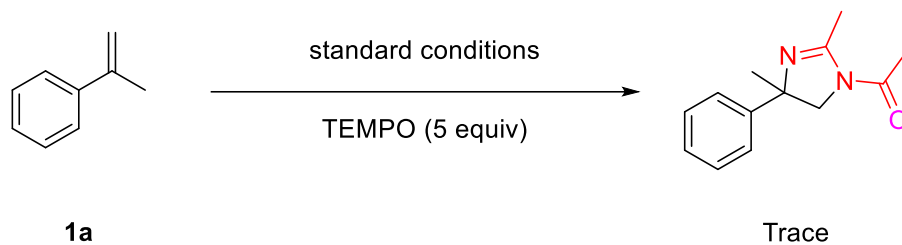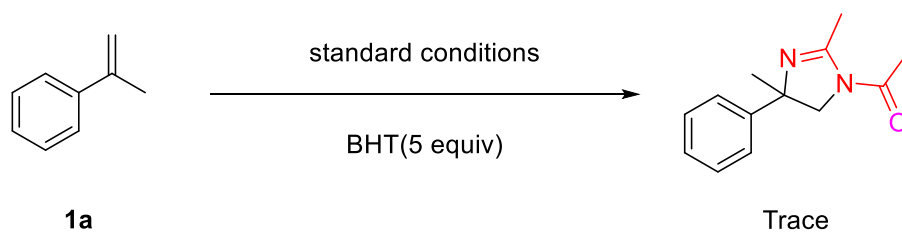

## 4.2 H<sub>2</sub><sup>18</sup>O-labeling experiment

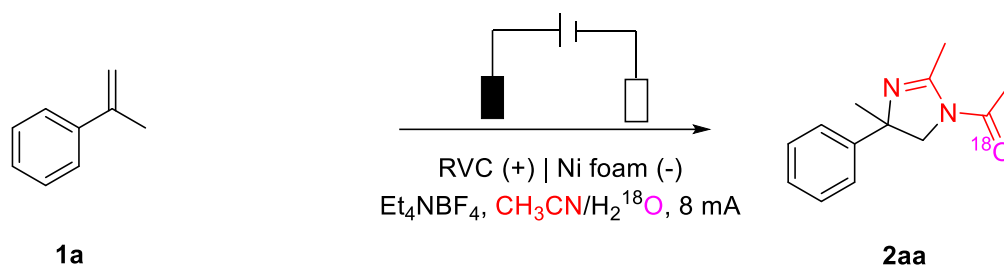

|             |                |                        |         |                 |                      |
|-------------|----------------|------------------------|---------|-----------------|----------------------|
| Sample Name | Sample6        | Position               | P1-A2   | Instrument Name | Instrument 1         |
| User Name   |                | Inj Vol                | 0.8     | InjPosition     |                      |
| Sample Type | Sample         | IRM Calibration Status | Success | Data Filename   | WGA-3-74.d           |
| ACQ Method  | #CYM-YJ-5MIN.m | Comment                |         | Acquired Time   | 5/29/2024 4:53:19 PM |

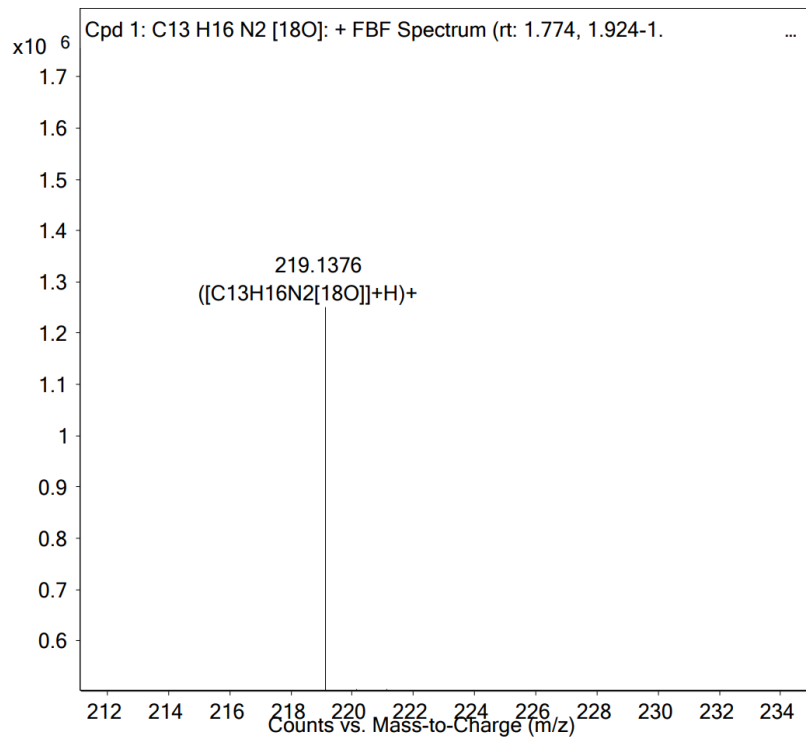

**Figure S2** HRMS analysis compound **2aa**. HRMS (m/z) [ESI]: calculated for C<sub>13</sub>H<sub>17</sub>N<sub>2</sub>[<sup>18</sup>O]<sup>+</sup> [M+H]<sup>+</sup>: 219.1378, found 219.1376.



### 4.3 Radical clock experiments

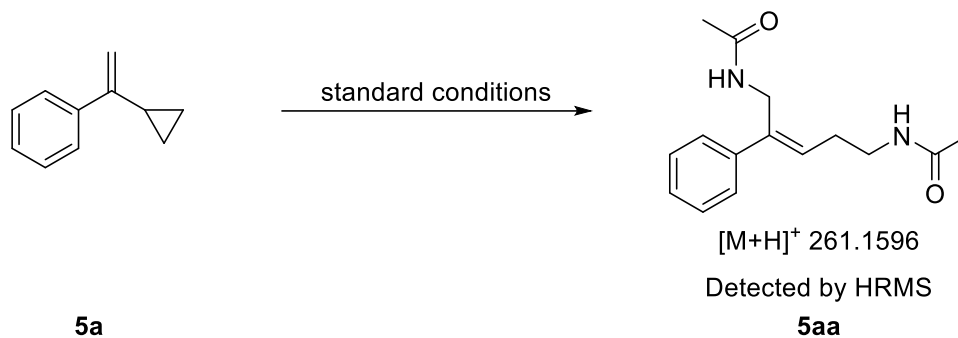

|             |                     |                        |         |                 |                      |
|-------------|---------------------|------------------------|---------|-----------------|----------------------|
| Sample Name | ZYY-01-ZYJ-0711     | Position               | P1-A1   | Instrument Name | Instrument 1         |
| User Name   |                     | Inj Vol                | 0.5     | InjPosition     |                      |
| Sample Type | Sample              | IRM Calibration Status | Success | Data Filename   | WGA-3-96.d           |
| ACQ Method  | #CYM-YJ-11MIN-300.m | Comment                |         | Acquired Time   | 7/12/2024 8:25:03 PM |

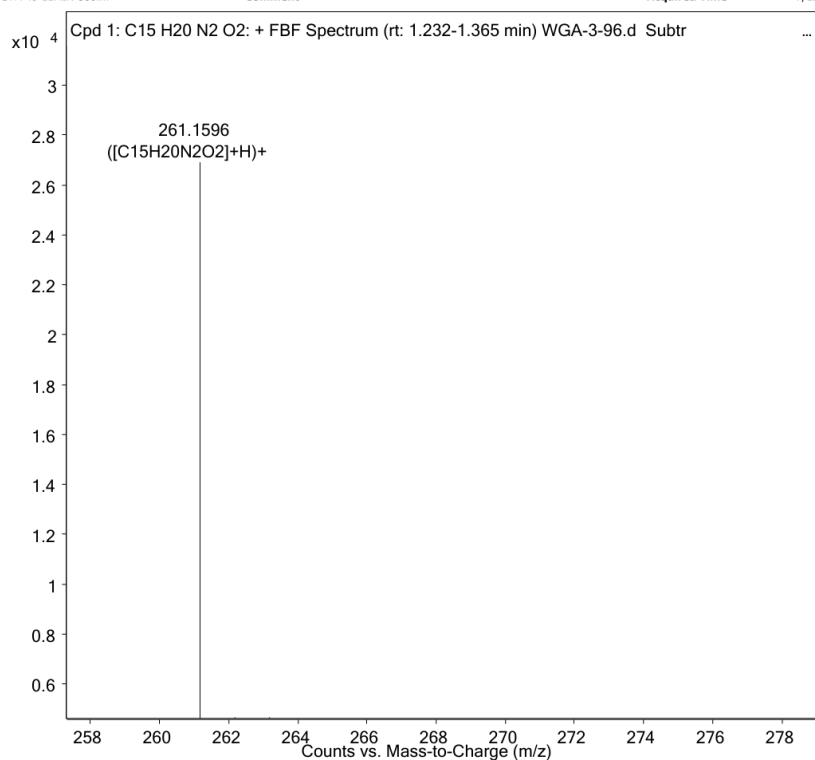

**Figure S3** HRMS analysis compound **5aa**. HRMS (m/z) [ESI]: calculated for C<sub>15</sub>H<sub>21</sub>N<sub>2</sub>O<sub>2</sub><sup>+</sup> [M+H]<sup>+</sup>: 261.1598, found 261.1596.

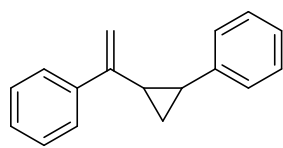

standard conditions

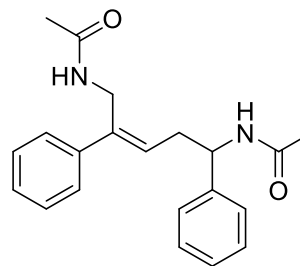

[M+H]<sup>+</sup> 337.1912

Detected by HRMS

**6a**

**6aa**

|             |                 |                        |         |                 |                       |
|-------------|-----------------|------------------------|---------|-----------------|-----------------------|
| Sample Name | 4               | Position               | P1-A4   | Instrument Name | Instrument 1          |
| User Name   |                 | Inj Vol                | 0.5     | InjPosition     |                       |
| Sample Type | Sample          | IRM Calibration Status | Success | Data Filename   | WGA-3-99-2.d          |
| ACQ Method  | #CYM-YJ-11MIN.m | Comment                |         | Acquired Time   | 7/16/2024 10:34:51 AM |

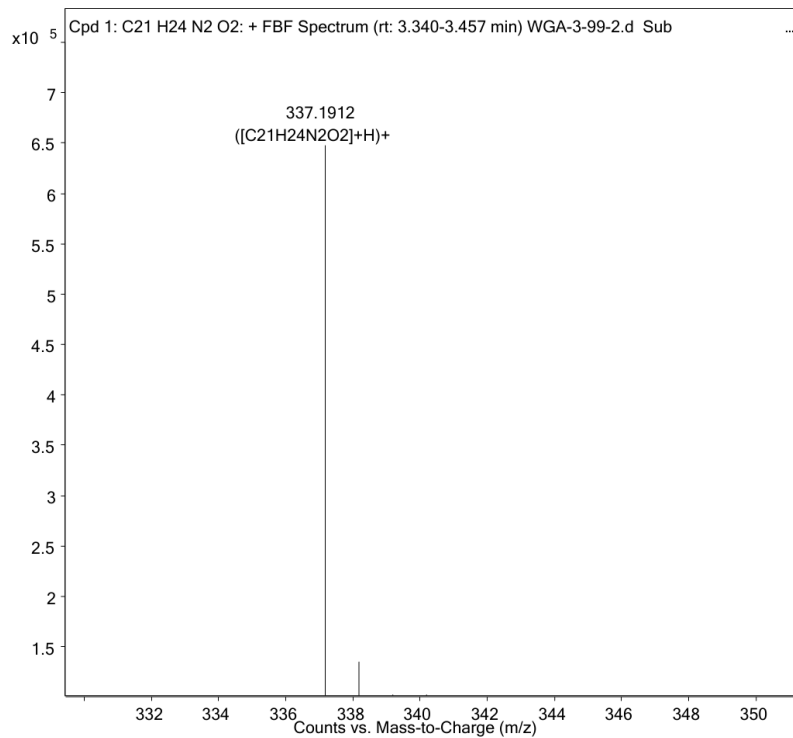

**Figure S4** HRMS analysis compound **6aa**. HRMS (m/z) [ESI]: calculated for C<sub>21</sub>H<sub>25</sub>N<sub>2</sub>O<sub>2</sub><sup>+</sup> [M+H]<sup>+</sup>: 337.1911, found 337.1912.

## 5. Electrochemical applications

### 5.1 Preparation of gram - scale reactions

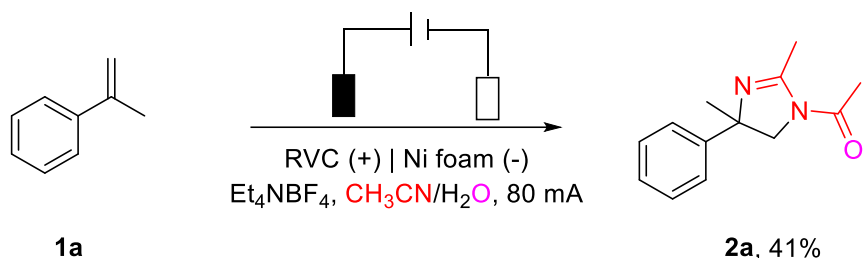

A 400 mL round-bottom flask was charged with **1a** (8 mmol, 1 equiv), Et<sub>4</sub>NBF<sub>4</sub> (32 mmol, 4.0 equiv), extra dry CH<sub>3</sub>CN and H<sub>2</sub>O as solvent (extra dry CH<sub>3</sub>CN = 300 mL, H<sub>2</sub>O = 250  $\mu$ L). The flask was equipped with a reticulated vitreous carbon (RVC) anode (100 PPI, 3 cm  $\times$  2 cm  $\times$  2 cm) and a Ni foam (4 cm  $\times$  0.5 cm  $\times$  1 cm) cathode, Electrolysis was carried out at room temperature under air atmosphere, which using a constant current of 80 mA until the substrate was completely consumed (monitored by TLC, about 20 hours). When the reaction was finished, the reaction mixture was washed with water and extracted with ethyl acetate (3  $\times$  100 mL). The organic layers were combined, dried over Na<sub>2</sub>SO<sub>4</sub>, and concentrated. The pure product was obtained by flash column chromatography on silica gel to afford the **2a** in 41% yield (0.71 g) (petroleum ether/ethyl acetate = 3: 1 to 1: 1)

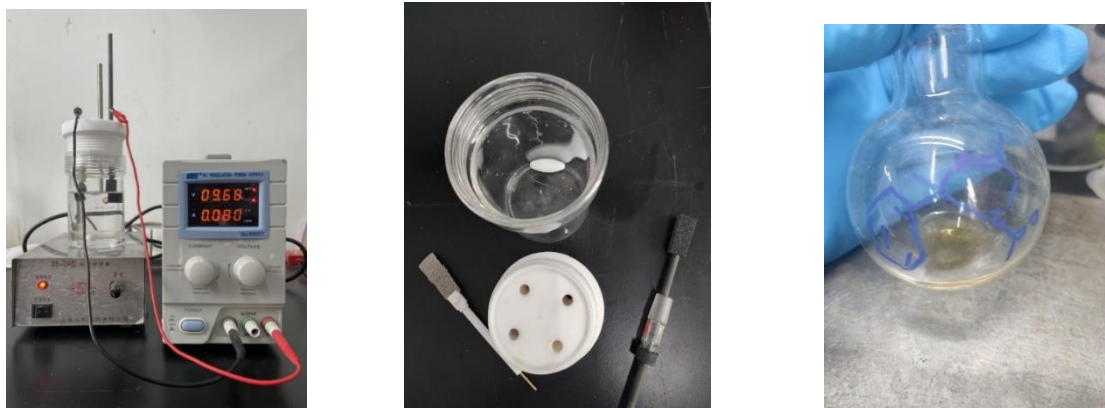

Figure S5 Electrolysis setup

## 5.2 Dihydroimidazole hydrolysis

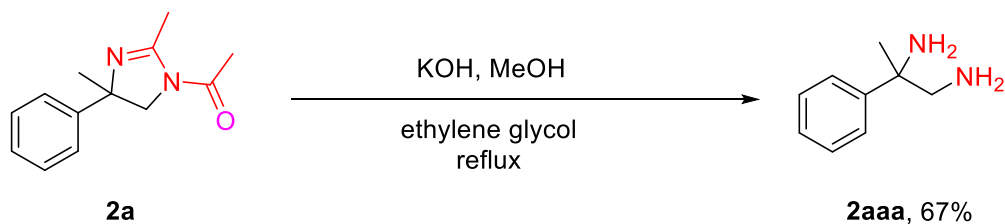

**2a** (0.2 mmol) was added to a mixture of KOH (10 M in H<sub>2</sub>O, 2.0 mL), MeOH (2.0 mL), and ethylene glycol (2.0 M), and the mixture was stirred while being heated to reflux (135 °C) for 48 h. After the reaction is complete, the methanol solvent is first removed by vacuum distillation. The solution is then added dropwise to a separately prepared 1M HCl (10 mL) solution. The mixture is then poured into water and extracted with CH<sub>2</sub>Cl<sub>2</sub> (3 × 10 mL). The combined organic layers are washed with brine and dried over anhydrous Na<sub>2</sub>SO<sub>4</sub>. After vacuum concentration. Then dissolve it in NaHCO<sub>3</sub> (aqueous solution) (15 mL) and extract with CH<sub>2</sub>Cl<sub>2</sub> (3 × 20 mL). Combine the organic layers and dry with Na<sub>2</sub>SO<sub>4</sub>, and concentrated under reduced pressure to obtain 20 mg (67% yield) of diamine product **2aaa**.

### 5.3 Dihydroimidazole-modified amino acids

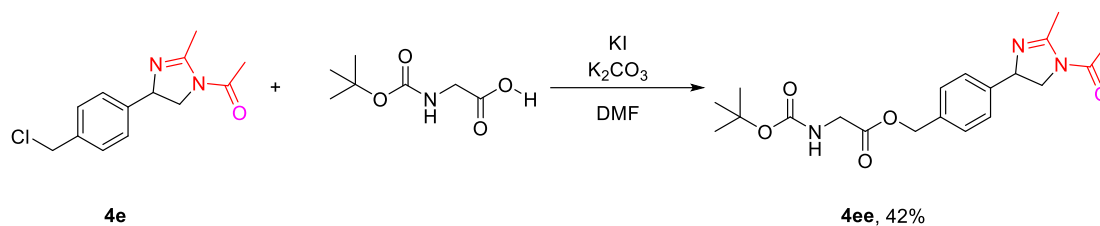

In a dry round bottom flask, BOC-Glycine (0.08 mmol) was dissolved in DMF (3 mL). Then, K<sub>2</sub>CO<sub>3</sub> (0.12 mmol), KI (0.12 mmol), and **4e** (0.08 mmol) were added, and the reaction was stirred at room temperature for 5 h. After completion of the reaction, 10 mL of ethyl acetate was added, followed by 10 mL of H<sub>2</sub>O. The reaction mixture was then extracted with ethyl acetate (3 x 10 mL), and the combined products were washed with saturated saline. The combined organic phases were washed with saturated brine. The organic layer was then dried with Na<sub>2</sub>SO<sub>4</sub>. After filtration, the solvent was removed under reduced pressure and the residue was purified by flash chromatography (eluent: PE/EA = 1:1) to give the desired product **4ee** (42%).

## 6. Cyclic Voltammetry Studies

The cyclic voltammograms were recorded in an electrolyte solution of  $\text{Et}_4\text{NBF}_4$  (0.1 M) in extra dry  $\text{CH}_3\text{CN}/\text{H}_2\text{O}$  using a glassy carbon disk working electrode (diameter, 3 mm), a Pt wire auxiliary electrode and an Ag/AgCl reference electrode. The scan rate was 100 mV/s

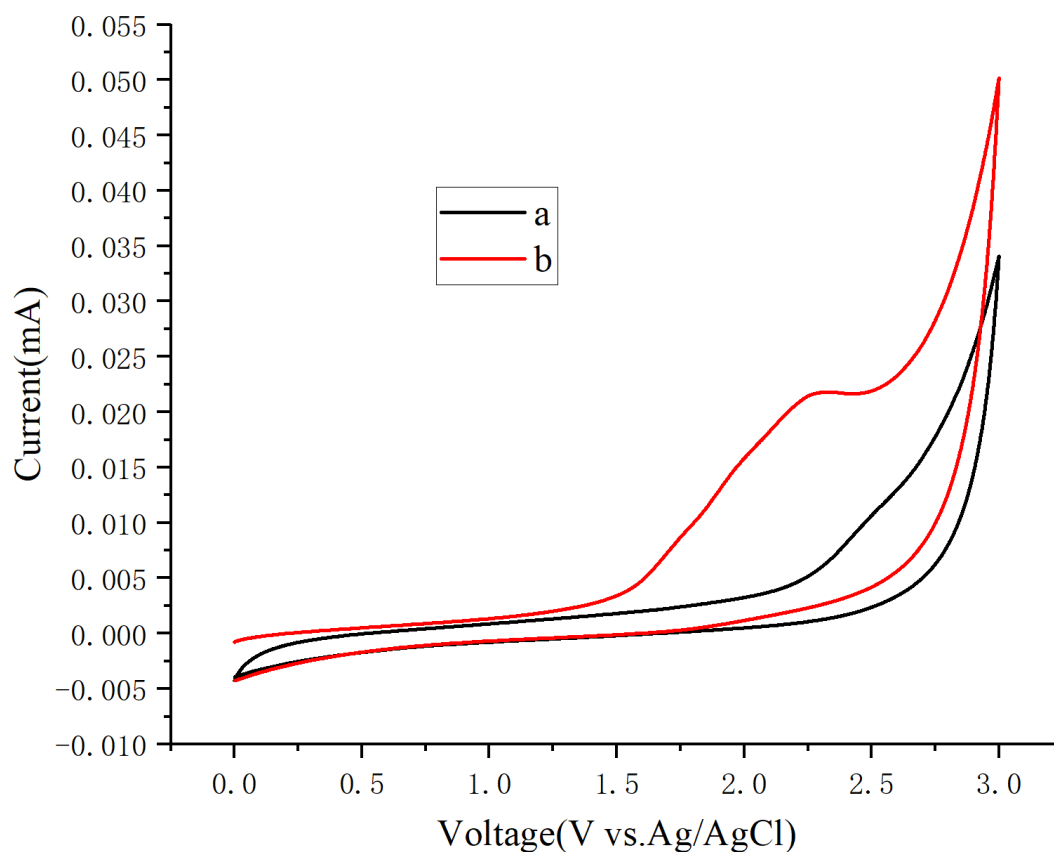

**Figure S6** Cyclic voltammograms in  $\text{CH}_3\text{CN}/\text{H}_2\text{O}$  (6:0.005) + 0.1 M  $\text{Et}_4\text{NBF}_4$ . (a) Blank. (b) **1a** (0.2 mmol). working electrode, glassy carbon disk. Charting with IUPAC. Init E (V) = 0 V, Final E (V) = 0 V, High E (V) = 2 V.

## 7. Characterization Data for the Products

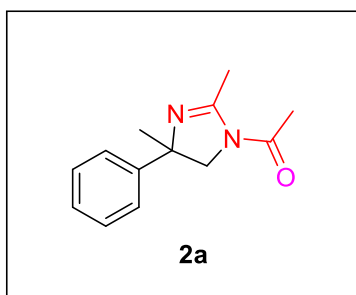

### 1-(2,4-dimethyl-4-phenyl-4,5-dihydro-1H-imidazol-1-yl) ethan-1-one.

The title compound (35.4 mg) was isolated by flash chromatography (petroleum ether/ethyl acetate = 3: 1 to 1: 1) in 82% yield, yellow oil.

**<sup>1</sup>H NMR** (400 MHz, Chloroform-*d*)  $\delta$  7.40 – 7.32 (m, 4H), 7.27 (m, 1H), 3.93 (s, 2H), 2.51 (s, 3H), 2.17 (s, 3H), 1.61 (s, 3H).

**<sup>13</sup>C NMR** (101 MHz, Chloroform-*d*)  $\delta$  168.0, 157.0, 147.0, 128.7, 127.1, 125.2, 69.6, 61.2, 30.2, 25.1, 19.0.

**HRMS** (*m/z*) (ESI): calculated for C<sub>13</sub>H<sub>17</sub>N<sub>2</sub>O<sup>+</sup> [M+H]<sup>+</sup>: 217.1335, found: 217.1337.

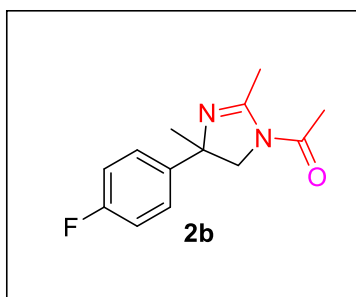

### 1-(4-(4-fluorophenyl)-2,4-dimethyl-4,5-dihydro-1H-imidazol-1-yl) ethan-1-one.

The title compound (35.6 mg) was isolated by flash chromatography (petroleum ether/ethyl acetate = 3: 1 to 1: 1) in 76% yield, yellow oil.

**<sup>1</sup>H NMR** (400 MHz, Chloroform-*d*)  $\delta$  7.33 (qd, *J* = 5.2, 2.1 Hz, 2H), 7.07 – 6.96 (m, 2H), 3.88 (qd, *J* = 10.0, 4.5 Hz, 2H), 2.47 (d, *J* = 4.7 Hz, 3H), 2.16 (d, *J* = 4.4 Hz, 3H), 1.57 (d, *J* = 4.5 Hz, 3H).

**<sup>13</sup>C NMR** (101 MHz, Chloroform-*d*)  $\delta$  168.0, 161.9 (d, *J* = 252.5 Hz), 157.1, 142.8 (d, *J* = 3.0 Hz), 126.9 (d, *J* = 8.08 Hz), 115.4 (d, *J* = 21.2 Hz), 69.1, 61.2, 30.3, 25.1, 19.0.

**<sup>19</sup>F NMR** (376 MHz, Chloroform-*d*)  $\delta$  -115.92.

**HRMS** (*m/z*) (ESI): calculated for C<sub>13</sub>H<sub>16</sub>FN<sub>2</sub>O<sup>+</sup> [M+H]<sup>+</sup>: 235.1242, found: 235.1244.

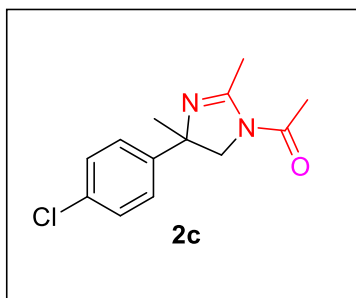

**1-(4-(4-chlorophenyl)-2,4-dimethyl-4,5-dihydro-1H-imidazol-1-yl) ethan-1-one.**

The title compound (35.5 mg) was isolated by flash chromatography (petroleum ether/ethyl acetate = 3: 1 to 1: 1) in 71% yield, yellow oil.

<sup>1</sup>H NMR (400 MHz, Chloroform-*d*) δ 7.29 (s, 4H), 3.92 – 3.80 (m, 2H), 2.45 (s, 3H), 2.14 (s, 3H), 1.54 (s, 3H).

<sup>13</sup>C NMR (151 MHz, Chloroform-*d*) δ 168.0, 157.2, 145.5, 132.9, 128.7, 126.7, 69.2, 61.0, 30.2, 25.0, 19.0.

HRMS (m/z) (ESI): calculated for C<sub>13</sub>H<sub>16</sub>ClN<sub>2</sub>O<sup>+</sup> [M+H]<sup>+</sup>: 251.0946, found: 251.0948.

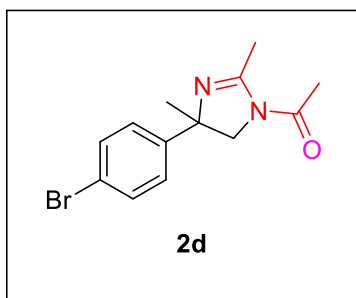

**1-(4-(4-bromophenyl)-2,4-dimethyl-4,5-dihydro-1H-imidazol-1-yl) ethan-1-one.**

The title compound (42.9 mg) was isolated by flash chromatography (petroleum ether/ethyl acetate = 3: 1 to 1: 1) in 73% yield, yellow oil.

<sup>1</sup>H NMR (400 MHz, Chloroform-*d*) δ 7.48 – 7.43 (m, 2H), 7.26 – 7.22 (m, 2H), 3.90 (d, *J* = 9.8 Hz, 1H), 3.84 (d, *J* = 9.8 Hz, 1H), 2.47 (s, 3H), 2.15 (s, 3H), 1.56 (s, 3H).

<sup>13</sup>C NMR (151 MHz, Chloroform-*d*) δ 168.0, 157.2, 146.1, 131.7, 127.1, 121.0, 69.3, 61.0, 30.2, 25.0, 19.0.

HRMS (m/z) (ESI): calculated for C<sub>13</sub>H<sub>16</sub>BrN<sub>2</sub>O<sup>+</sup> [M+H]<sup>+</sup>: 295.0441, found: 295.0442.

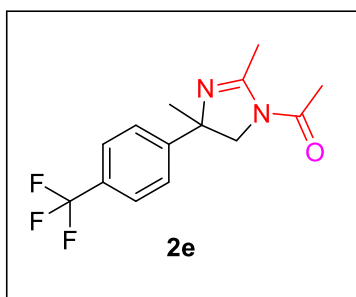

**1-(2,4-dimethyl-4-(4-(trifluoromethyl) phenyl)-4,5-dihydro-1H-imidazol-1-yl) ethan-1-one.**

The title compound (40.9 mg) was isolated by flash chromatography (petroleum ether/ethyl acetate = 3: 1 to 1: 1) in 72% yield, yellow oil.

<sup>1</sup>H NMR (400 MHz, Chloroform-*d*) δ 7.58 (d, *J* = 8.1 Hz, 2H), 7.48 (d, *J* = 8.0 Hz, 2H), 3.94 (d, *J*



= 9.8 Hz, 1H), 3.86 (d,  $J = 9.7$  Hz, 1H), 2.46 (d,  $J = 1.9$  Hz, 3H), 2.14 (s, 3H), 1.57 (s, 3H).

$^{13}\text{C}$  NMR (101 MHz, Chloroform-*d*)  $\delta$  168.0, 157.4, 150.9, 129.4 (q,  $J = 30.3$  Hz), 125.7, 125.6 (q,  $J = 4.0$  Hz), 122.8, 69.5, 60.8, 30.2, 25.0, 19.0.

$^{19}\text{F}$  NMR (376 MHz, Chloroform-*d*)  $\delta$  -62.47.

HRMS (m/z) (ESI): calculated for  $\text{C}_{14}\text{H}_{19}\text{F}_3\text{N}_3\text{O}^+$   $[\text{M}+\text{NH}_4]^+$ : 302.1475, found: 302.1473.

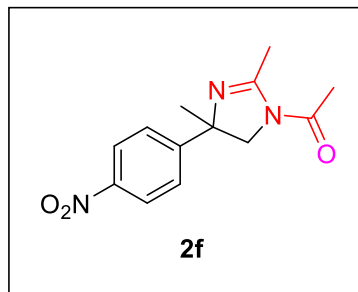

#### 1-(2,4-dimethyl-4-(4-nitrophenyl)-4,5-dihydro-1H-imidazol-1-yl) ethan-1-one.

The title compound (31.9 mg) was isolated by flash chromatography (petroleum ether/ethyl acetate = 3: 1 to 1: 1) in 61% yield, yellow oil.

$^1\text{H}$  NMR (400 MHz, Chloroform-*d*)  $\delta$  8.21 – 8.17 (m, 2H), 7.58 – 7.54 (m, 2H), 3.99 (d,  $J = 9.9$  Hz, 1H), 3.88 (d,  $J = 9.9$  Hz, 1H), 2.48 (s, 3H), 2.18 (s, 3H), 1.60 (s, 3H).

$^{13}\text{C}$  NMR (151 MHz, Chloroform-*d*)  $\delta$  168.0, 157.7, 154.2, 147.0, 126.4, 124.0, 69.6, 60.5, 30.4, 25.0, 19.0.

HRMS (m/z) (ESI): calculated for  $\text{C}_{13}\text{H}_{16}\text{N}_3\text{O}_3^+$   $[\text{M}+\text{H}]^+$ : 262.1187, found: 262.1189.

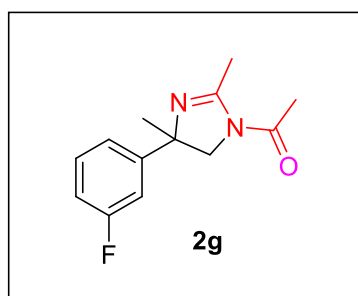

#### 1-(4-(3-fluorophenyl)-2,4-dimethyl-4,5-dihydro-1H-imidazol-1-yl) ethan-1-one.

The title compound (38.9 mg) was isolated by flash chromatography (petroleum ether/ethyl acetate = 3: 1 to 1: 1) in 83% yield, yellow oil.

$^1\text{H}$  NMR (400 MHz, Chloroform-*d*)  $\delta$  7.33 – 7.26 (m, 1H), 7.13 – 7.06 (m, 2H), 6.94 – 6.88 (m, 1H), 3.91 – 3.83 (m, 2H), 2.49 – 2.44 (m, 3H), 2.14 (s, 3H), 1.56 (s, 3H).

$^{13}\text{C}$  NMR (101 MHz, Chloroform-*d*)  $\delta$  167.9, 163.0 (d,  $J = 252.5$  Hz), 157.3, 149.7 (d,  $J = 10.1$  Hz), 130.2 (d,  $J = 10.1$  Hz), 120.8 (d,  $J = 10.1$  Hz), 113.9 (d,  $J = 20.2$  Hz), 112.5 (d,  $J = 20.2$  Hz), 69.3, 60.9, 30.1, 25.0, 18.9.

$^{19}\text{F}$  NMR (376 MHz, Chloroform-*d*)  $\delta$  -112.42.

HRMS (m/z) (ESI): calculated for  $\text{C}_{13}\text{H}_{16}\text{FN}_2\text{O}^+$   $[\text{M}+\text{H}]^+$ : 235.1242, found: 235.1244.

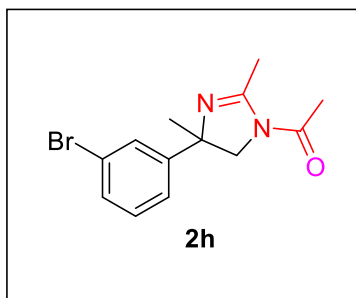

**1-(4-(3-bromophenyl)-2,4-dimethyl-4,5-dihydro-1H-imidazol-1-yl) ethan-1-one.**

The title compound (38.8 mg) was isolated by flash chromatography (petroleum ether/ethyl acetate = 3: 1 to 1: 1) in 66% yield, yellow oil.

**<sup>1</sup>H NMR** (400 MHz, Chloroform-*d*) δ 7.55 – 7.49 (m, 1H), 7.38 (dd, *J* = 6.9, 4.3 Hz, 1H), 7.29 (dt, *J* = 7.9, 4.8 Hz, 1H), 7.21 (td, *J* = 7.7, 4.4 Hz, 1H), 3.89 (qd, *J* = 10.0, 4.3 Hz, 2H), 2.48 (d, *J* = 4.6 Hz, 3H), 2.16 (d, *J* = 4.4 Hz, 3H), 1.57 (d, *J* = 4.5 Hz, 3H).

**<sup>13</sup>C NMR** (101 MHz, Chloroform-*d*) δ 168.0, 157.3, 149.3, 130.2, 130.2, 128.5, 123.9, 122.8, 69.2, 60.9, 30.2, 25.0, 18.9.

**HRMS** (*m/z*) (ESI): calculated for C<sub>13</sub>H<sub>16</sub>BrN<sub>2</sub>O<sup>+</sup> [*M*+*H*]<sup>+</sup>: 295.0441, found: 295.0442.

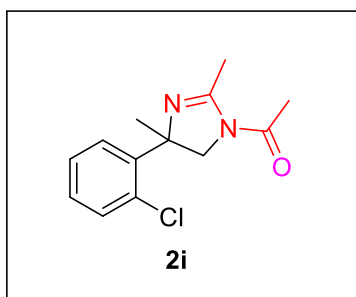

**1-(4-(2-chlorophenyl)-2,4-dimethyl-4,5-dihydro-1H-imidazol-1-yl) ethan-1-one.**

The title compound (32.5 mg) was isolated by flash chromatography (petroleum ether/ethyl acetate = 3: 1 to 1: 1) in 65% yield, yellow oil.

**<sup>1</sup>H NMR** (400 MHz, Chloroform-*d*) δ 7.86 (dd, *J* = 7.8, 1.9 Hz, 1H), 7.37 (dd, *J* = 7.7, 1.6 Hz, 1H), 7.27 – 7.19 (m, 2H), 4.20 (d, *J* = 10.5 Hz, 1H), 4.04 (d, *J* = 10.4 Hz, 1H), 2.49 (s, 3H), 2.19 (s, 3H), 1.65 (s, 3H).

**<sup>13</sup>C NMR** (101 MHz, Chloroform-*d*) δ 168.1, 156.3, 144.1, 131.0, 130.9, 128.6, 128.5, 127.1, 69.8, 59.6, 28.4, 25.1, 19.0.

**HRMS** (*m/z*) (ESI): calculated for C<sub>13</sub>H<sub>16</sub>ClN<sub>2</sub>O<sup>+</sup> [*M*+*H*]<sup>+</sup>: 251.0946, found: 251.0949.

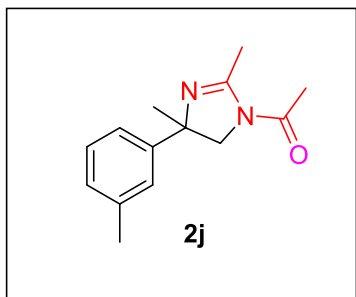

**1-(2,4-dimethyl-4-(m-tolyl)-4,5-dihydro-1H-imidazol-1-yl) ethan-1-one.**

The title compound (25.3 mg) was isolated by flash chromatography (petroleum ether/ethyl acetate

= 3: 1 to 1: 1) in 55% yield, yellow oil.

**<sup>1</sup>H NMR** (400 MHz, Chloroform-*d*)  $\delta$  7.23 (t,  $J = 7.6$  Hz, 1H), 7.20 – 7.13 (m, 2H), 7.06 (d,  $J = 7.4$  Hz, 1H), 3.90 (s, 2H), 2.48 (s, 3H), 2.35 (s, 3H), 2.15 (s, 3H), 1.58 (s, 3H).

**<sup>13</sup>C NMR** (151 MHz, Chloroform-*d*)  $\delta$  168.0, 156.8, 147.0, 138.2, 128.5, 127.7, 125.8, 122.1, 69.5, 61.1, 30.2, 25.0, 21.6, 19.0.

**HRMS** (m/z) (ESI): calculated for C<sub>14</sub>H<sub>19</sub>N<sub>2</sub>O<sup>+</sup> [M+H]<sup>+</sup>: 231.1492, found: 231.1496.

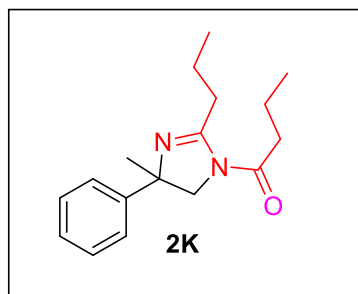

**1-(4-methyl-4-phenyl-2-propyl-4,5-dihydro-1H-imidazol-1-yl) butan-1-one.**

The title compound (33.3 mg) was isolated by flash chromatography (petroleum ether/ethyl acetate = 10: 1) in 61% yield, yellow oil.

**<sup>1</sup>H NMR** (400 MHz, Chloroform-*d*)  $\delta$  7.40 – 7.31 (m, 4H), 7.24 (td,  $J = 5.0, 2.3$  Hz, 1H), 3.89 (d,  $J = 9.7$  Hz, 1H), 3.85 (d,  $J = 9.7$  Hz, 1H), 2.87 (td,  $J = 7.2, 2.5$  Hz, 2H), 2.36 – 2.23 (m, 2H), 1.76 (q,  $J = 7.5$  Hz, 2H), 1.69 – 1.63 (m, 2H), 1.59 (s, 3H), 1.03 (t,  $J = 7.4$  Hz, 3H), 0.96 (t,  $J = 7.4$  Hz, 3H).

**<sup>13</sup>C NMR** (101 MHz, Chloroform-*d*)  $\delta$  170.4, 160.6, 147.3, 128.6, 127.0, 125.3, 69.6, 60.8, 39.0, 33.8, 30.2, 20.4, 17.7, 14.1, 13.8.

**HRMS** (m/z) (ESI): calculated for C<sub>17</sub>H<sub>25</sub>N<sub>2</sub>O<sup>+</sup> [M+H]<sup>+</sup>: 273.1962, found: 273.1959.

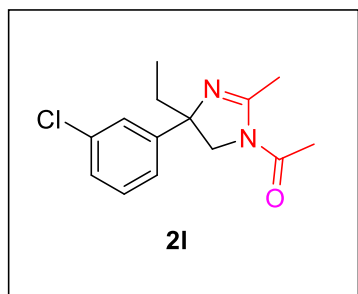

**1-(4-(3-chlorophenyl)-4-ethyl-2-methyl-4,5-dihydro-1H-imidazol-1-yl) ethan-1-one.**

The title compound (39.1 mg) was isolated by flash chromatography (petroleum ether/ethyl acetate = 3: 1 to 1: 1) in 74% yield, yellow oil.

**<sup>1</sup>H NMR** (400 MHz, Chloroform-*d*)  $\delta$  7.37 (s, 1H), 7.29 (d,  $J = 7.9$  Hz, 1H), 7.23 (dd,  $J = 6.5, 4.6$  Hz, 2H), 3.96 (d,  $J = 10.0$  Hz, 1H), 3.86 (d,  $J = 9.9$  Hz, 1H), 2.49 (d,  $J = 1.5$  Hz, 3H), 2.17 (s, 3H), 1.90 – 1.81 (m, 2H), 0.85 – 0.80 (m, 3H).

**<sup>13</sup>C NMR** (101 MHz, Chloroform-*d*)  $\delta$  167.8, 157.2, 148.5, 134.4, 129.8, 127.0, 126.0, 123.8, 72.8, 58.6, 36.1, 25.0, 18.8, 8.3.

**HRMS** (m/z) (ESI): calculated for C<sub>14</sub>H<sub>18</sub>ClN<sub>2</sub>O<sup>+</sup> [M+H]<sup>+</sup>: 265.1103, found: 265.1108.

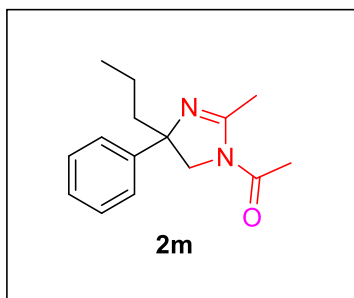

**1-(2-methyl-4-phenyl-4-propyl-4,5-dihydro-1H-imidazol-1-yl) ethan-1-one.**

The title compound (32.2 mg) was isolated by flash chromatography (petroleum ether/ethyl acetate = 3: 1 to 1: 1) in 66% yield, yellow oil.

<sup>1</sup>H NMR (400 MHz, Chloroform-*d*) δ 7.39 – 7.29 (m, 4H), 7.25 – 7.20 (m, 1H), 3.96 (d, *J* = 9.9 Hz, 1H), 3.89 (d, *J* = 9.8 Hz, 1H), 2.48 (s, 3H), 2.15 (s, 3H), 1.80 (qdd, *J* = 13.6, 11.5, 4.8 Hz, 2H), 1.33 (tdd, *J* = 12.1, 7.4, 5.0 Hz, 1H), 1.21 – 1.07 (m, 1H), 0.86 (t, *J* = 7.3 Hz, 3H).

<sup>13</sup>C NMR (101 MHz, Chloroform-*d*) δ 167.8, 156.8, 146.7, 128.5, 126.9, 125.5, 72.8, 59.2, 46.0, 25.0, 18.9, 17.3, 14.3.

HRMS (*m/z*) (ESI): calculated for C<sub>15</sub>H<sub>21</sub>N<sub>2</sub>O<sup>+</sup> [M+H]<sup>+</sup>: 245.1649, found: 245.1650.

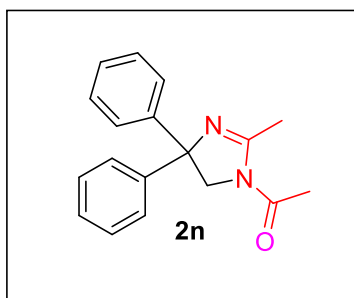

**1-(2-methyl-4,4-diphenyl-4,5-dihydro-1H-imidazol-1-yl) ethan-1-one.**

The title compound (33.9 mg) was isolated by flash chromatography (petroleum ether/ethyl acetate = 3: 1 to 1: 1) in 61% yield, yellow oil.

<sup>1</sup>H NMR (400 MHz, Chloroform-*d*) δ 7.33 (d, *J* = 3.9 Hz, 10H), 4.44 (s, 2H), 2.53 (s, 3H), 2.22 (s, 3H).

<sup>13</sup>C NMR (101 MHz, Chloroform-*d*) δ 167.7, 158.7, 146.2, 128.7, 127.3, 126.5, 68.4, 60.6, 25.1, 19.0.

HRMS (*m/z*) (ESI): calculated for C<sub>18</sub>H<sub>19</sub>N<sub>2</sub>O<sup>+</sup> [M+H]<sup>+</sup>: 279.1492, found: 279.1496.

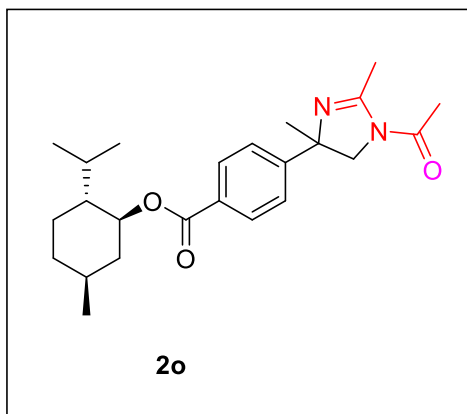

**(1S,2R,5S)-2-isopropyl-5-methylcyclohexyl  
imidazol-4-yl) benzoate.**

**4-(1-acetyl-2,4-dimethyl-4,5-dihydro-1H-**

The title compound (43.8 mg) was isolated by flash chromatography (petroleum ether/ethyl acetate = 3: 1 to 1: 1) in 55% yield, yellow oil.

**<sup>1</sup>H NMR** (400 MHz, Chloroform-*d*) δ 8.04 – 7.96 (m, 2H), 7.48 – 7.39 (m, 2H), 4.90 (td, *J* = 10.9, 4.4 Hz, 1H), 3.98 – 3.83 (m, 2H), 2.47 (s, 3H), 2.14 (s, 3H), 2.11 – 2.05 (m, 1H), 1.95 – 1.86 (m, 1H), 1.74 – 1.67 (m, 2H), 1.58 (s, 3H), 1.56 – 1.48 (m, 2H), 1.14 – 1.04 (m, 2H), 0.94 – 0.86 (m, 7H), 0.76 (dd, *J* = 7.0, 1.3 Hz, 3H).

**<sup>13</sup>C NMR** (101 MHz, Chloroform-*d*) δ 167.9, 165.8, 157.1, 151.9, 151.8, 130.0, 129.7, 129.7, 125.2, 74.9, 69.6, 60.8, 47.3, 41.0, 34.4, 31.5, 30.3, 30.2, 26.6, 26.6, 25.0, 23.8, 22.1, 20.8, 19.0, 16.6.

**HRMS** (m/z) (ESI): calculated for C<sub>24</sub>H<sub>35</sub>N<sub>2</sub>O<sub>3</sub><sup>+</sup> [M+H]<sup>+</sup>: 399.2643, found: 399.2651.

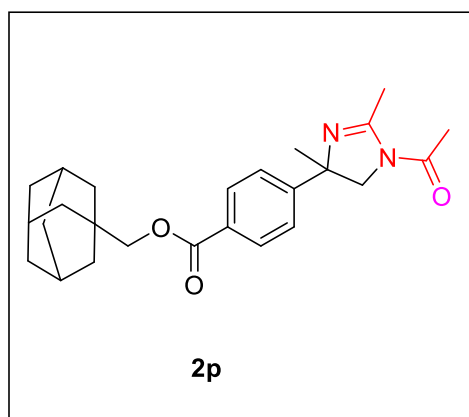

**Adamantan-1-ylmethyl 4-(1-acetyl-2,4-dimethyl-4,5-dihydro-1H-imidazol-4-yl) benzoate.**

The title compound (35.1 mg) was isolated by flash chromatography (petroleum ether/ethyl acetate = 3: 1 to 1: 1) in 43% yield, yellow oil.

**<sup>1</sup>H NMR** (400 MHz, Chloroform-*d*) δ 8.03 (d, *J* = 8.1 Hz, 2H), 7.46 (d, *J* = 8.1 Hz, 2H), 3.97 – 3.87 (m, 4H), 2.49 (s, 3H), 2.17 (s, 3H), 2.00 (s, 3H), 1.77 – 1.65 (m, 7H), 1.63 – 1.60 (m, 8H).

**<sup>13</sup>C NMR** (101 MHz, Chloroform-*d*) δ 167.9, 166.5, 157.6, 151.9, 130.0, 129.5, 125.3, 74.6, 69.6, 60.9, 39.5, 37.1, 33.7, 30.3, 28.2, 25.1, 19.0.

**HRMS** (m/z) (ESI): calculated for C<sub>25</sub>H<sub>33</sub>N<sub>2</sub>O<sub>3</sub><sup>+</sup> [M+H]<sup>+</sup>: 409.2486, found: 409.2496.

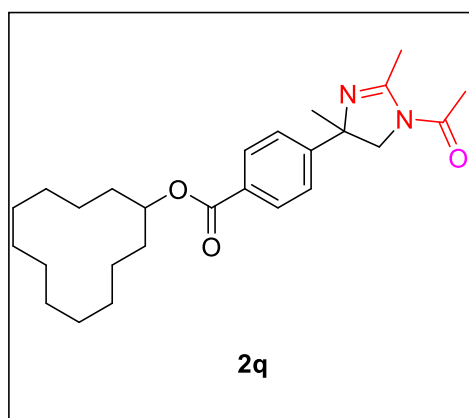

**Cyclododecyl 4-(1-acetyl-2,4-dimethyl-4,5-dihydro-1H-imidazol-4-yl) benzoate.**

The title compound (34.1 mg) was isolated by flash chromatography (petroleum ether/ethyl acetate = 3: 1 to 1: 1) in 40% yield, yellow oil.

**<sup>1</sup>H NMR** (400 MHz, Chloroform-*d*) δ 8.00 (d, *J* = 8.1 Hz, 2H), 7.44 (d, *J* = 8.1 Hz, 2H), 5.24 (tt, *J* = 7.3, 4.6 Hz, 1H), 3.97 – 3.82 (m, 2H), 2.49 (s, 3H), 2.16 (s, 3H), 1.81 (dt, *J* = 13.3, 6.7 Hz, 2H), 1.63 (dd, *J* = 10.4, 4.4 Hz, 2H), 1.59 (s, 3H), 1.44 (p, *J* = 6.8, 4.9 Hz, 9H), 1.39 – 1.32 (m, 9H).

**<sup>13</sup>C NMR** (101 MHz, Chloroform-*d*) δ 168.0, 166.1, 157.3, 151.7, 130.0, 129.8, 125.2, 73.1, 69.6, 60.9, 30.3, 29.2, 29.2, 25.1, 24.3, 24.1, 23.5, 23.3, 23.3, 21.0, 19.0.

**HRMS** (*m/z*) (ESI): calculated for C<sub>26</sub>H<sub>39</sub>N<sub>2</sub>O<sub>3</sub><sup>+</sup> [*M*+*H*]<sup>+</sup>: 427.2956, found: 427.2961.

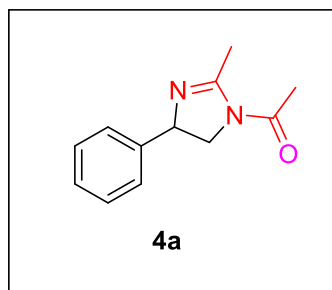

**1-(2-methyl-4-phenyl-4,5-dihydro-1H-imidazol-1-yl) ethan-1-one.**

The title compound (30.3 mg) was isolated by flash chromatography (petroleum ether/ethyl acetate = 1: 1 to 0: 1) in 75% yield, yellow oil.

**<sup>1</sup>H NMR** (500 MHz, Chloroform-*d*) δ 7.38 (m, 2H), 7.34 – 7.26 (m, 3H), 5.13 (ddd, *J* = 10.2, 7.8, 1.8 Hz, 1H), 4.28 (t, *J* = 10.2 Hz, 1H), 3.73 (dd, *J* = 10.0, 7.5 Hz, 1H), 2.52 (d, *J* = 1.6 Hz, 3H), 2.20 (s, 3H).

**<sup>13</sup>C NMR** (126 MHz, Chloroform-*d*) δ 168.0, 159.2, 142.3, 129.0, 127.8, 126.6, 66.9, 55.3, 25.1, 18.9.

**HRMS** (*m/z*) (ESI): calculated for C<sub>12</sub>H<sub>15</sub>N<sub>2</sub>O<sup>+</sup> [*M*+*H*]<sup>+</sup>: 203.1179, found: 203.1175.

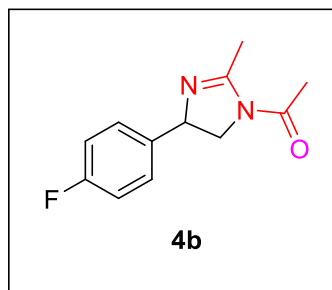

**1-(4-(4-fluorophenyl)-2-methyl-4,5-dihydro-1H-imidazol-1-yl) ethan-1-one.**

The title compound (26.9 mg) was isolated by flash chromatography (petroleum ether/ethyl acetate = 2: 1 to 0: 1) in 61% yield, yellow oil.

**<sup>1</sup>H NMR** (400 MHz, Chloroform-*d*) δ 7.24 – 7.17 (m, 2H), 7.07 – 7.00 (m, 2H), 5.09 (ddd, *J* = 9.8, 7.7, 1.8 Hz, 1H), 4.25 (t, *J* = 10.2 Hz, 1H), 3.66 (dd, *J* = 10.1, 7.6 Hz, 1H), 2.49 (d, *J* = 1.7 Hz, 3H), 2.18 (s, 3H).

**<sup>13</sup>C NMR** (101 MHz, Chloroform-*d*) δ 168.0, 162.6 (d, *J* = 242.4 Hz), 159.5, 138.1 (d, *J* = 10.1 Hz), 128.3 (d, *J* = 10.1 Hz), 115.8 (d, *J* = 20.2 Hz), 66.3, 55.4, 25.1, 18.9.

**<sup>19</sup>F NMR** (376 MHz, Chloroform-*d*) δ -114.72.

**HRMS** (*m/z*) (ESI): calculated for C<sub>12</sub>H<sub>14</sub>FN<sub>2</sub>O<sup>+</sup> [*M*+*H*]<sup>+</sup>: 221.1085, found: 221.1077.

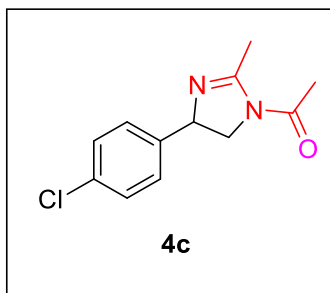

**1-(4-(4-chlorophenyl)-2-methyl-4,5-dihydro-1H-imidazol-1-yl) ethan-1-one.**

The title compound (27.4 mg) was isolated by flash chromatography (petroleum ether/ethyl acetate = 3: 1 to 1: 1) in 58% yield, yellow oil.

**<sup>1</sup>H NMR** (400 MHz, Chloroform-*d*) δ 7.35 – 7.29 (m, 2H), 7.21 – 7.15 (m, 2H), 5.08 (ddd, *J* = 10.0, 7.8, 1.9 Hz, 1H), 4.24 (t, *J* = 10.2 Hz, 1H), 3.64 (dd, *J* = 10.0, 7.6 Hz, 1H), 2.49 (d, *J* = 1.7 Hz, 3H), 2.17 (s, 3H).

**<sup>13</sup>C NMR** (101 MHz, Chloroform-*d*) δ 168.0, 159.7, 140.7, 133.7, 129.1, 128.0, 66.2, 55.2, 25.1, 19.0.

**HRMS** (*m/z*) (ESI): calculated for C<sub>12</sub>H<sub>14</sub>ClN<sub>2</sub>O<sup>+</sup> [M+H]<sup>+</sup>: 237.0790, found: 237.0783.

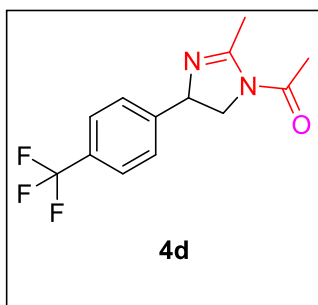

**1-(2-methyl-4-(4-(trifluoromethyl) phenyl)-4,5-dihydro-1H-imidazol-1-yl) ethan-1-one.**

The title compound (33.5 mg) was isolated by flash chromatography (petroleum ether/ethyl acetate = 3: 1 to 1: 1) in 62% yield, yellow oil.

**<sup>1</sup>H NMR** (400 MHz, Chloroform-*d*) δ 7.62 (d, *J* = 8.0 Hz, 2H), 7.38 (d, *J* = 8.0 Hz, 2H), 5.18 (t, *J* = 9.2 Hz, 1H), 4.29 (t, *J* = 10.3 Hz, 1H), 3.67 (dd, *J* = 10.1, 7.6 Hz, 1H), 2.51 (d, *J* = 1.6 Hz, 3H), 2.18 (s, 3H).

**<sup>13</sup>C NMR** (101 MHz, Chloroform-*d*) δ 167.9, 159.9, 146.2, 130.1 (q, *J* = 32.3 Hz), 127.0, 125.9 (q, *J* = 4.0 Hz), 123.9 (q, *J* = 273.7 Hz), 66.5, 55.0, 25.1, 19.0.

**<sup>19</sup>F NMR** (376 MHz, Chloroform-*d*) δ -62.51.

**HRMS** (*m/z*) (ESI): calculated for C<sub>13</sub>H<sub>14</sub>F<sub>3</sub>N<sub>2</sub>O<sup>+</sup> [M+H]<sup>+</sup>: 271.1053, found: 271.1057.

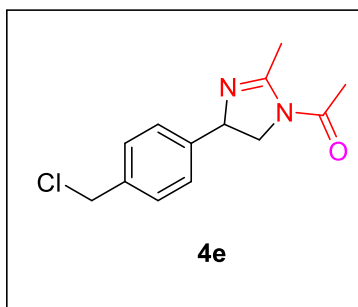

**1-(4-(4-(chloromethyl) phenyl)-2-methyl-4,5-dihydro-1H-imidazol-1-yl)ethan-1-one.**

The title compound (33.5 mg) was isolated by flash chromatography (petroleum ether/ethyl acetate = 3: 1 to 1: 1) in 67% yield, yellow oil.

**<sup>1</sup>H NMR** (400 MHz, Chloroform-*d*)  $\delta$  7.39 (d,  $J$  = 8.2 Hz, 2H), 7.25 (d,  $J$  = 8.7 Hz, 2H), 5.17 – 5.09 (m, 1H), 4.58 (s, 2H), 4.26 (t,  $J$  = 10.2 Hz, 1H), 3.70 (dd,  $J$  = 10.0, 7.5 Hz, 1H), 2.51 (d,  $J$  = 1.6 Hz, 3H), 2.18 (s, 3H).

**<sup>13</sup>C NMR** (101 MHz, Chloroform-*d*)  $\delta$  168.0, 160.0, 142.5, 137.1, 129.3, 127.0, 66.5, 55.2, 46.0, 25.2, 19.0.

**HRMS** ( $m/z$ ) (ESI): calculated for C<sub>13</sub>H<sub>16</sub>ClN<sub>2</sub>O<sup>+</sup> [M+H]<sup>+</sup>: 251.0946, found: 251.0947.

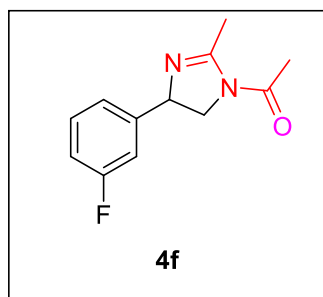

**1-(4-(3-fluorophenyl)-2-methyl-4,5-dihydro-1H-imidazol-1-yl) ethan-1-one.**

The title compound (35.2 mg) was isolated by flash chromatography (petroleum ether/ethyl acetate = 3: 1 to 1: 1) in 80% yield, yellow oil.

**<sup>1</sup>H NMR** (500 MHz, Chloroform-*d*)  $\delta$  7.32 (m, 1H), 7.02 (m, 1H), 7.00 – 6.94 (m, 2H), 5.10 (ddd,  $J$  = 9.9, 7.7, 1.9 Hz, 1H), 4.25 (t,  $J$  = 10.3 Hz, 1H), 3.67 (dd,  $J$  = 10.1, 7.6 Hz, 1H), 2.49 (d,  $J$  = 1.6 Hz, 3H), 2.17 (s, 3H).

**<sup>13</sup>C NMR** (126 MHz, Chloroform-*d*)  $\delta$  168.0, 163.2 (d,  $J$  = 202.0 Hz), 159.6, 144.9 (d,  $J$  = 6.1 Hz), 130.5 (d,  $J$  = 10.1 Hz), 122.2 (d,  $J$  = 2.0 Hz), 114.7 (d,  $J$  = 20.2 Hz), 113.6 (d,  $J$  = 20.2 Hz), 66.5, 55.1, 25.1, 19.0.

**<sup>19</sup>F NMR** (471 MHz, Chloroform-*d*)  $\delta$  -112.33.

**HRMS** ( $m/z$ ) (ESI): calculated for C<sub>12</sub>H<sub>14</sub>FN<sub>2</sub>O<sup>+</sup> [M+H]<sup>+</sup>: 221.1085, found: 221.1080.

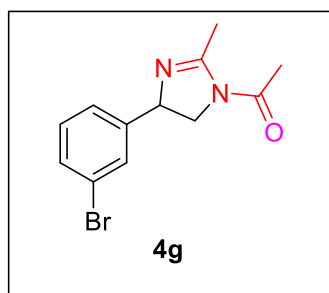

**1-(4-(3-bromophenyl)-2-methyl-4,5-dihydro-1H-imidazol-1-yl) ethan-1-one.**

The title compound (39.8 mg) was isolated by flash chromatography (petroleum ether/ethyl acetate = 3: 1 to 1: 1) in 71% yield, yellow oil.

**<sup>1</sup>H NMR** (400 MHz, Chloroform-*d*)  $\delta$  7.44 – 7.38 (m, 2H), 7.25 – 7.15 (m, 2H), 5.08 (ddd,  $J$  = 10.2, 7.8, 1.9 Hz, 1H), 4.24 (t,  $J$  = 10.3 Hz, 1H), 3.66 (dd,  $J$  = 10.1, 7.7 Hz, 1H), 2.49 (d,  $J$  = 1.7 Hz, 3H), 2.17 (s, 3H).

**<sup>13</sup>C NMR** (101 MHz, Chloroform-*d*)  $\delta$  167.9, 159.7, 144.6, 130.9, 130.5, 129.7, 125.3, 123.1, 66.4, 55.1, 25.1, 19.0.



**HRMS** (m/z) (ESI): calculated for  $C_{12}H_{14}BrN_2O^+$   $[M+H]^+$ : 281.0285, found: 281.0281.

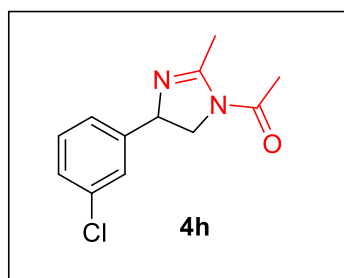

**1-(4-(3-chlorophenyl)-2-methyl-4,5-dihydro-1H-imidazol-1-yl) ethan-1-one.**

The title compound (28.8 mg) was isolated by flash chromatography (petroleum ether/ethyl acetate = 3: 1 to 1: 1) in 61% yield, yellow oil.

**$^1H$  NMR** (400 MHz, Chloroform-*d*)  $\delta$  7.32 – 7.27 (m, 2H), 7.25 (d,  $J$  = 1.9 Hz, 1H), 7.14 (dt,  $J$  = 7.0, 1.9 Hz, 1H), 5.10 (ddd,  $J$  = 10.0, 7.7, 1.9 Hz, 1H), 4.26 (t,  $J$  = 10.3 Hz, 1H), 3.68 (dd,  $J$  = 10.1, 7.6 Hz, 1H), 2.51 (d,  $J$  = 1.7 Hz, 3H), 2.19 (s, 3H).

**$^{13}C$  NMR** (101 MHz, Chloroform-*d*)  $\delta$  167.9, 159.7, 144.3, 134.8, 130.2, 128.0, 126.8, 124.8, 66.4, 55.1, 25.1, 19.0.

**HRMS** (m/z) (ESI): calculated for  $C_{12}H_{14}ClN_2O^+$   $[M+H]^+$ : 237.0790, found: 237.0795.

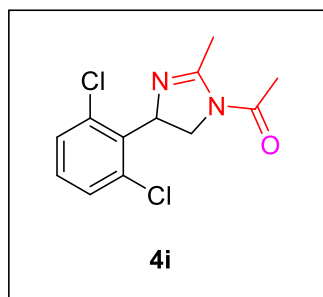

**1-(4-(2,6-dichlorophenyl)-2-methyl-4,5-dihydro-1H-imidazol-1-yl) ethan-1-one.**

The title compound (33.5 mg) was isolated by flash chromatography (petroleum ether/ethyl acetate = 3: 1 to 1: 1) in 62% yield, yellow oil.

**$^1H$  NMR** (400 MHz, Chloroform-*d*)  $\delta$  7.30 (d,  $J$  = 8.0 Hz, 2H), 7.15 (dd,  $J$  = 8.5, 7.5 Hz, 1H), 5.98 – 5.89 (m, 1H), 4.15 (dd,  $J$  = 11.5, 10.1 Hz, 1H), 3.98 (dd,  $J$  = 10.0, 8.4 Hz, 1H), 2.44 (d,  $J$  = 1.9 Hz, 3H), 2.19 (s, 3H).

**$^{13}C$  NMR** (101 MHz, Chloroform-*d*)  $\delta$  168.0, 160.5, 135.9, 134.9, 129.5, 129.5, 63.5, 51.3, 25.1, 18.8.

**HRMS** (m/z) (ESI): calculated for  $C_{12}H_{13}Cl_2N_2O^+$   $[M+H]^+$ : 271.0400, found: 271.0400.

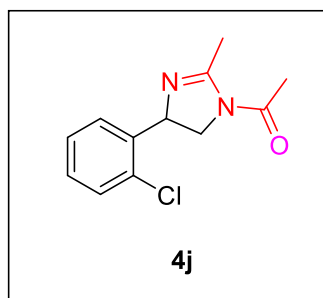

**1-(4-(2-chlorophenyl)-2-methyl-4,5-dihydro-1H-imidazol-1-yl) ethan-1-one.**

The title compound (24.6 mg) was isolated by flash chromatography (petroleum ether/ethyl acetate

= 3: 1 to 1: 1) in 52% yield, white solid.

**<sup>1</sup>H NMR** (400 MHz, Chloroform-*d*) δ 7.41 – 7.36 (m, 1H), 7.34 (dd, *J* = 7.6, 2.0 Hz, 1H), 7.30 – 7.22 (m, 2H), 5.47 – 5.39 (m, 1H), 4.40 (t, *J* = 10.4 Hz, 1H), 3.54 (dd, *J* = 10.1, 7.5 Hz, 1H), 2.54 (s, 3H), 2.16 (s, 3H).

**<sup>13</sup>C NMR** (101 MHz, Chloroform-*d*) δ 168.1, 160.3, 140.3, 132.3, 129.5, 128.9, 127.7, 127.3, 64.5, 54.4, 25.2, 19.1.

**HRMS** (m/z) (ESI): calculated for C<sub>12</sub>H<sub>14</sub>ClN<sub>2</sub>O<sup>+</sup> [M+H]<sup>+</sup>: 237.0790, found: 237.0784.

**MP:** 102-106 °C

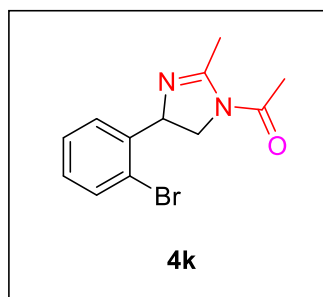

**1-(4-(2-bromophenyl)-2-methyl-4,5-dihydro-1H-imidazol-1-yl) ethan-1-one.**

The title compound (28.0 mg) was isolated by flash chromatography (petroleum ether/ethyl acetate = 3: 1 to 1: 1) in 50% yield, yellow oil.

**<sup>1</sup>H NMR** (400 MHz, Chloroform-*d*) δ 7.57 (dd, *J* = 7.9, 1.1 Hz, 1H), 7.31 (qd, *J* = 7.8, 1.8 Hz, 2H), 7.16 (ddd, *J* = 7.8, 6.6, 2.5 Hz, 1H), 5.44 – 5.36 (m, 1H), 4.42 (t, *J* = 10.3 Hz, 1H), 3.52 (dd, *J* = 10.1, 7.4 Hz, 1H), 2.54 (d, *J* = 1.7 Hz, 3H), 2.15 (s, 3H).

**<sup>13</sup>C NMR** (101 MHz, Chloroform-*d*) δ 168.1, 160.4, 142.0, 132.8, 129.2, 128.0, 127.9, 122.6, 66.3, 54.5, 25.2, 19.1.

**HRMS** (m/z) (ESI): calculated for C<sub>12</sub>H<sub>14</sub>BrN<sub>2</sub>O<sup>+</sup> [M+H]<sup>+</sup>: 281.0285, found: 281.0286.

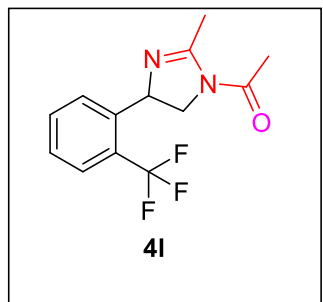

**1-(2-methyl-4-(2-(trifluoromethyl) phenyl)-4,5-dihydro-1H-imidazol-1-yl) ethan-1-one.**

The title compound (35.1 mg) was isolated by flash chromatography (petroleum ether/ethyl acetate = 3: 1 to 1: 1) in 65% yield, white solid.

**<sup>1</sup>H NMR** (400 MHz, Chloroform-*d*) δ 7.66 (d, *J* = 7.8 Hz, 1H), 7.57 (t, *J* = 7.6 Hz, 1H), 7.39 (t, *J* = 7.8 Hz, 2H), 5.50 (t, *J* = 9.2 Hz, 1H), 4.26 (t, *J* = 10.4 Hz, 1H), 3.52 (dd, *J* = 10.2, 7.6 Hz, 1H), 2.54 (d, *J* = 1.6 Hz, 3H), 2.14 (s, 3H).

**<sup>13</sup>C NMR** (101 MHz, Chloroform-*d*) δ 168.0, 160.5, 140.9, 132.8, 127.8 (q, *J* = 12.1 Hz), 127.4 (q, *J* = 30.3 Hz), 125.9 (q, *J* = 10.1 Hz), 123.1, 63.0, 55.7 (q, *J* = 2.02 Hz), 25.1, 19.0.

**<sup>19</sup>F NMR** (376 MHz, Chloroform-*d*) δ -58.91.

**HRMS** (m/z) (ESI): calculated for C<sub>13</sub>H<sub>14</sub>F<sub>3</sub>N<sub>2</sub>O<sup>+</sup> [M+H]<sup>+</sup>: 271.1053, found: 271.1054.

**MP:** 110-114 °C

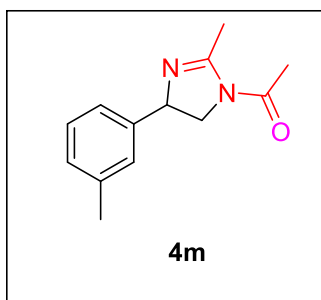

**1-(2-methyl-4-(m-tolyl)-4,5-dihydro-1H-imidazol-1-yl) ethan-1-one.**

The title compound (19.5 mg) was isolated by flash chromatography (petroleum ether/ethyl acetate = 3: 1 to 1: 1) in 45% yield, yellow oil.

**<sup>1</sup>H NMR** (400 MHz, Chloroform-*d*) δ 7.24 (t, *J* = 7.5 Hz, 1H), 7.09 (d, *J* = 7.6 Hz, 1H), 7.06 – 6.98 (m, 2H), 5.07 (ddd, *J* = 9.9, 7.7, 1.9 Hz, 1H), 4.22 (t, *J* = 10.2 Hz, 1H), 3.69 (dd, *J* = 10.0, 7.6 Hz, 1H), 2.50 (d, *J* = 1.7 Hz, 3H), 2.35 (s, 3H), 2.17 (s, 3H).

**<sup>13</sup>C NMR** (101 MHz, Chloroform-*d*) δ 168.0, 159.0, 142.2, 138.7, 128.8, 128.5, 127.1, 123.6, 70.0, 55.3, 25.1, 21.6, 19.0.

**HRMS** (*m/z*) (ESI): calculated for C<sub>13</sub>H<sub>17</sub>N<sub>2</sub>O<sup>+</sup> [M+H]<sup>+</sup>: 217.1336, found: 217.1329.

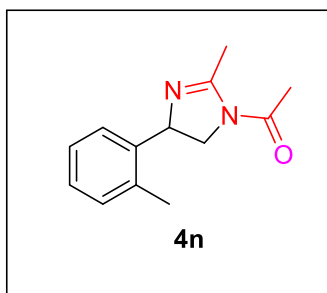

**1-(2-methyl-4-(o-tolyl)-4,5-dihydro-1H-imidazol-1-yl) ethan-1-one.**

The title compound (17.7 mg) was isolated by flash chromatography (petroleum ether/ethyl acetate = 3: 1 to 1: 1) in 41% yield, yellow oil.

**<sup>1</sup>H NMR** (400 MHz, Chloroform-*d*) δ 7.24 – 7.14 (m, 4H), 5.29 (ddd, *J* = 10.7, 7.5, 1.8 Hz, 1H), 4.28 (t, *J* = 10.1 Hz, 1H), 3.56 (dd, *J* = 9.8, 7.5 Hz, 1H), 2.53 (d, *J* = 1.7 Hz, 3H), 2.33 (s, 3H), 2.16 (s, 3H).

**<sup>13</sup>C NMR** (101 MHz, Chloroform-*d*) δ 168.0, 159.4, 140.8, 134.6, 130.5, 127.6, 126.7, 125.8, 63.8, 54.6, 25.2, 19.6, 19.0.

**HRMS** (*m/z*) (ESI): calculated for C<sub>13</sub>H<sub>17</sub>N<sub>2</sub>O<sup>+</sup> [M+H]<sup>+</sup>: 217.1336, found: 217.1336.

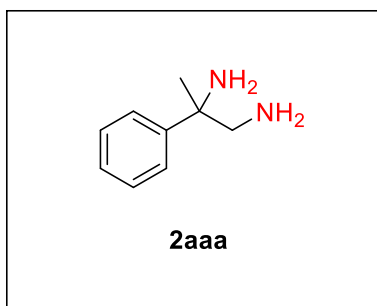

**2-phenylpropane-1,2-diamine.**

**<sup>1</sup>H NMR** (400 MHz, Chloroform-*d*) δ 7.45 – 7.40 (m, 2H), 7.33 (t, *J* = 7.6 Hz, 2H), 7.22 (t, *J* = 7.3 Hz, 1H), 2.91 (d, *J* = 13.0 Hz, 1H), 2.74 (d, *J* = 12.9 Hz, 1H), 1.80 (s, 4H), 1.42 (s, 3H).

**<sup>13</sup>C NMR** (101 MHz, Chloroform-*d*) δ 146.9, 128.4, 126.6, 125.5, 56.2, 54.5, 28.8.

**HRMS** (*m/z*) (ESI): calculated for C<sub>9</sub>H<sub>15</sub>N<sub>2</sub><sup>+</sup> [M+H]<sup>+</sup>: 151.1230, found: 151.1228.

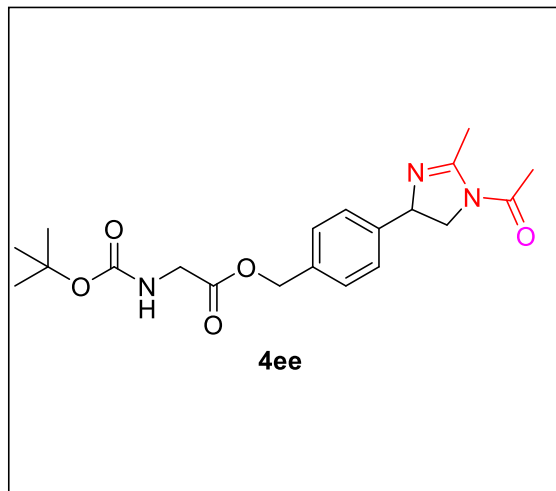

**4-(1-acetyl-2-methyl-4,5-dihydro-1H-imidazol-4-yl) benzyl (tert-butoxycarbonyl) glycinate.**

The title compound (13.1 mg) was isolated by flash chromatography (petroleum ether/ethyl acetate = 1: 1 to 0: 1) in 42 % yield, yellow oil.

**<sup>1</sup>H NMR** (400 MHz, Chloroform-*d*) δ 7.35 (d, *J* = 7.9 Hz, 2H), 7.26 (s, 2H), 5.17 (s, 2H), 5.14 (d, *J* = 6.7 Hz, 1H), 5.00 (s, 1H), 4.29 (t, *J* = 10.2 Hz, 1H), 3.94 (d, *J* = 5.7 Hz, 2H), 3.72 (dd, *J* = 10.0, 7.5 Hz, 1H), 2.54 (s, 3H), 2.19 (s, 3H), 1.44 (s, 9H).

**<sup>13</sup>C NMR** (151 MHz, Chloroform-*d*) δ 170.2, 162.7, 167.9, 155.7, 134.9, 129.0, 126.7, 66.7, 66.1, 55.1, 42.5, 29.2, 25.0, 18.7.

**HRMS** (*m/z*) (ESI): calculated for C<sub>20</sub>H<sub>28</sub>N<sub>3</sub>O<sub>5</sub><sup>+</sup> [M+H]<sup>+</sup>: 390.2024, found: 390.2022.

## 8. Single-Crystal X-Ray Diffraction

Single-crystal X-ray diffraction data were collected on a Rigaku XtaLAB Synergy, Dualflex, Rigaku XtaLAB Synergy-S diffractometer coupled to a RigakuHypix detector with Cu K $\alpha$  radiation ( $\lambda = 1.54184 \text{ \AA}$ ). Single crystals suitable for X-ray diffraction were obtained by recrystallization from a solution of CHCl<sub>3</sub> layered the crystal was kept at a steady T = 100 K during the data collection. The structures were solved with the SHELXT solution program by using Olex 2 (Dolomanov et al., 2009) as the graphical interface. The model was refined using Least Squares minimisation with the 2018/3 version of the program SHELXL.<sup>2</sup>

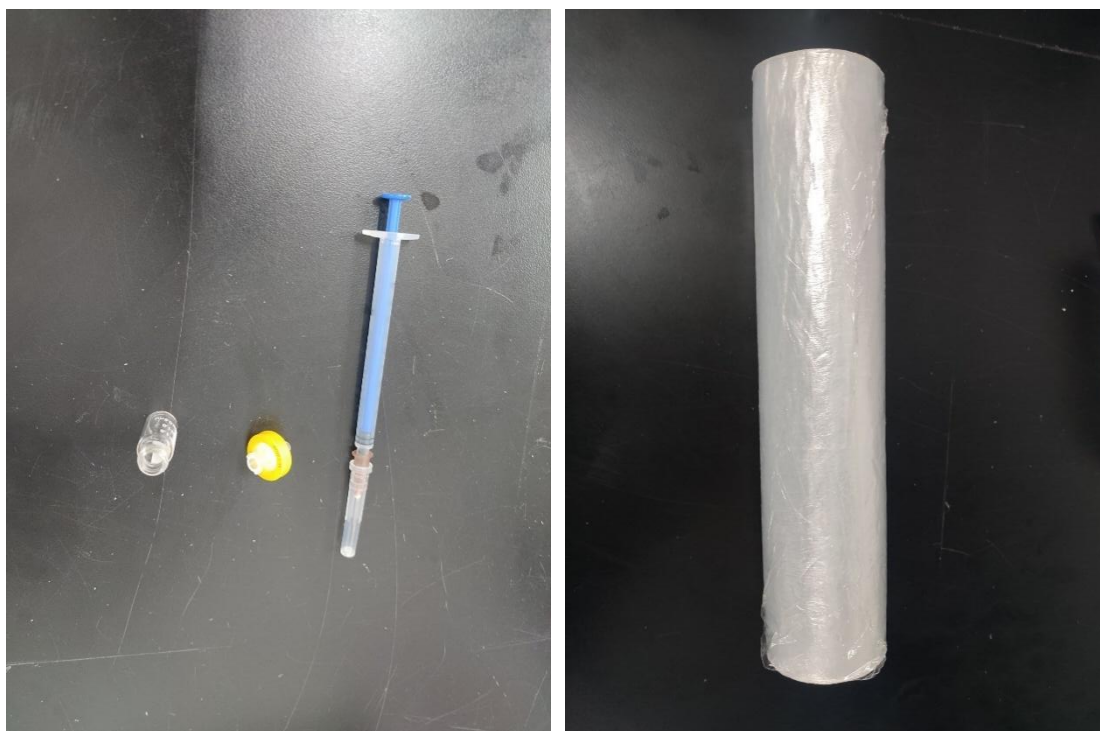

**Figure S7** Preparation of crystals: The solvent used was CHCl<sub>3</sub>, and after the solid was fully dissolved, it was drawn up in a 1 mL syringe, punched through the filter membrane into a small-mouthed glass vial, sealed with a cling film, and then several holes were pierced with a needle, and left to evaporate until crystals were produced.

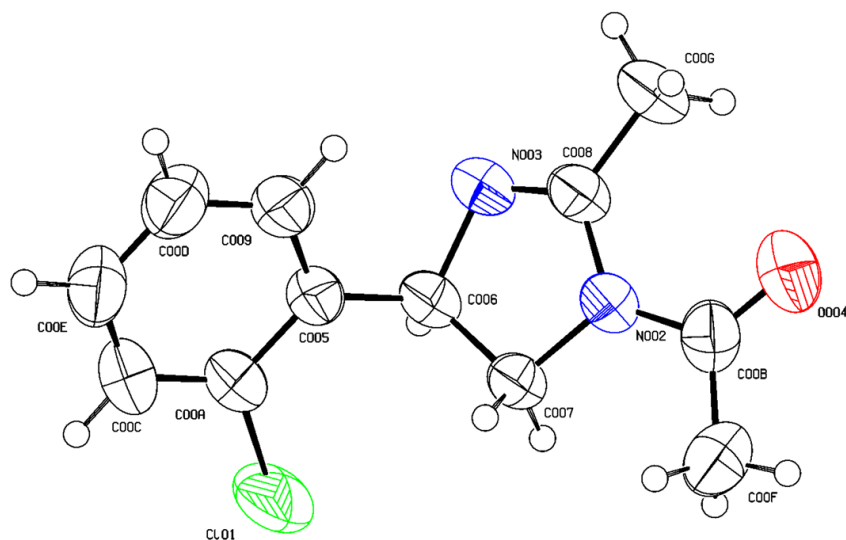

**Figure S8** X-ray molecular structure of **4j** (ellipsoids set at 50% probability).

**Table S2** Crystal data and structure refinement for **4j**

| Identification code                         | <b>4j</b>                                                     |
|---------------------------------------------|---------------------------------------------------------------|
| Empirical formula                           | C <sub>12</sub> H <sub>13</sub> ClN <sub>2</sub> O            |
| Formula weight                              | 236.69                                                        |
| Temperature/K                               | 295.89(10)                                                    |
| Crystal system                              | orthorhombic                                                  |
| Space group                                 | P2 <sub>1</sub> 2 <sub>1</sub> 2 <sub>1</sub>                 |
| a/Å                                         | 8.3724(5)                                                     |
| b/Å                                         | 10.2633(5)                                                    |
| c/Å                                         | 13.8066(7)                                                    |
| α/°                                         | 90                                                            |
| β/°                                         | 90                                                            |
| γ/°                                         | 90                                                            |
| Volume/Å <sup>3</sup>                       | 1186.38(11)                                                   |
| Z                                           | 4                                                             |
| ρ <sub>calc</sub> /cm <sup>3</sup>          | 1.325                                                         |
| μ/mm <sup>-1</sup>                          | 2.690                                                         |
| F(000)                                      | 496.0                                                         |
| Crystal size/mm <sup>3</sup>                | 0.1 × 0.1 × 0.05                                              |
| Radiation                                   | Cu Kα (λ = 1.54184)                                           |
| 2θ range for data collection/°              | 10.74 to 153.67                                               |
| Index ranges                                | -6 ≤ h ≤ 10, -12 ≤ k ≤ 12, -16 ≤ l ≤ 16                       |
| Reflections collected                       | 5283                                                          |
| Independent reflections                     | 2177 [R <sub>int</sub> = 0.0201, R <sub>sigma</sub> = 0.0255] |
| Data/restraints/parameters                  | 2177/0/147                                                    |
| Goodness-of-fit on F <sup>2</sup>           | 1.090                                                         |
| Final R indexes [I ≥ 2σ (I)]                | R <sub>1</sub> = 0.0455, wR <sub>2</sub> = 0.1326             |
| Final R indexes [all data]                  | R <sub>1</sub> = 0.0500, wR <sub>2</sub> = 0.1366             |
| Largest diff. peak/hole / e Å <sup>-3</sup> | 0.12/-0.25                                                    |

**Table S3** Selected bond distances and angles for **4j**.

| Bond Distances(Å) |          |
|-------------------|----------|
| Cl01 - C00A       | 1.743(3) |
| N002 - C007       | 1.475(4) |
| N002 - C008       | 1.411(4) |
| N002 - C00B       | 1.369(4) |
| N003 - C006       | 1.468(4) |
| N003 - C008       | 1.264(4) |
| O004 - C00B       | 1.214(4) |
| C005 - C006       | 1.510(4) |
| C005 - C009       | 1.383(4) |
| Cl01 - C00A       | 1.743(3) |
| N002 - C007       | 1.475(4) |
| N002 - C008       | 1.411(4) |
| N002 - C00B       | 1.369(4) |
| N003 - C006       | 1.468(4) |
| N003 - C008       | 1.264(4) |
| O004 - C00B       | 1.214(4) |
| C005 - C006       | 1.510(4) |
| C005 - C009       | 1.383(4) |

## 9. Copies of $^1\text{H}$ NMR and $^{13}\text{C}$ NMR for the Products

1-(2,4-dimethyl-4-phenyl-4,5-dihydro-1H-imidazol-1-yl) ethan-1-one (**2a**)

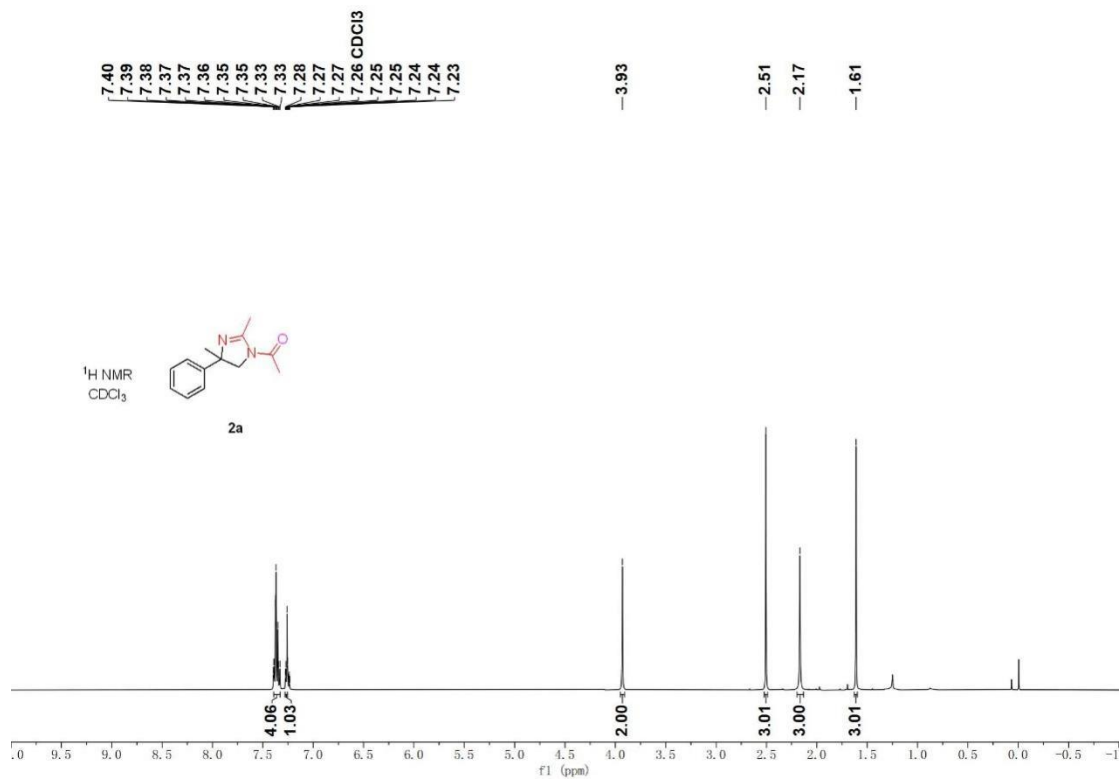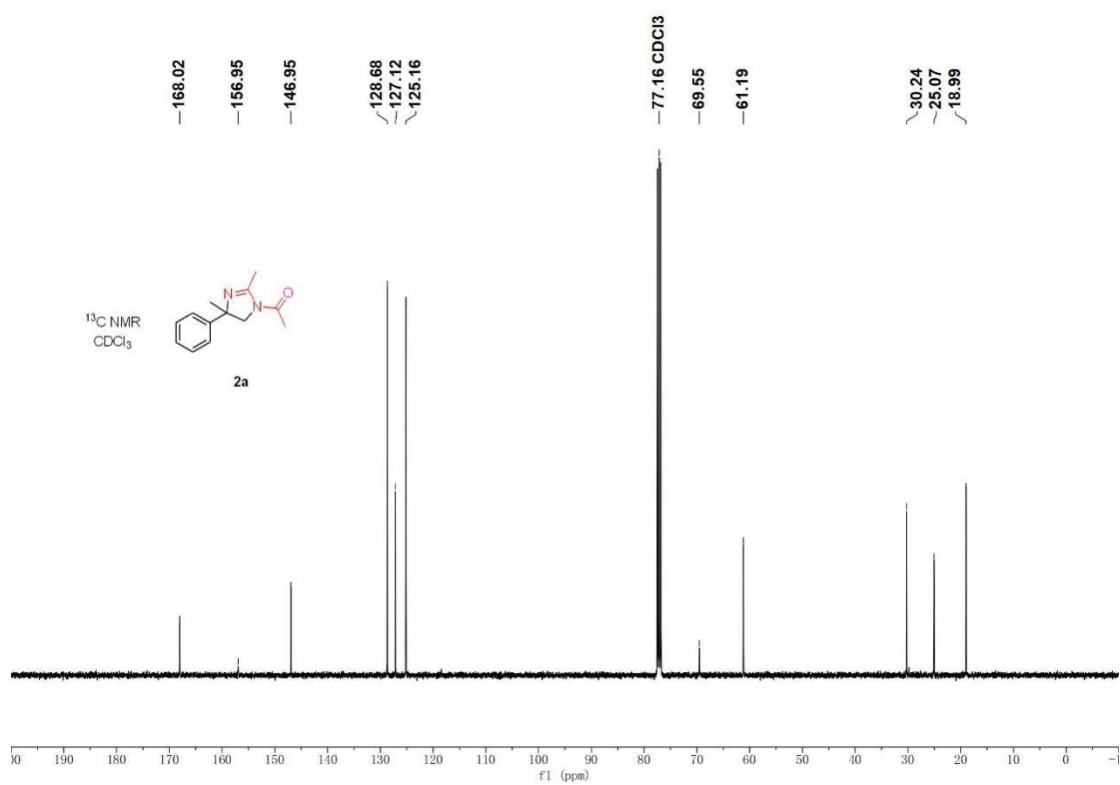



1-(4-(4-fluorophenyl)-2,4-dimethyl-4,5-dihydro-1H-imidazol-1-yl) ethan-1-one (**2b**)

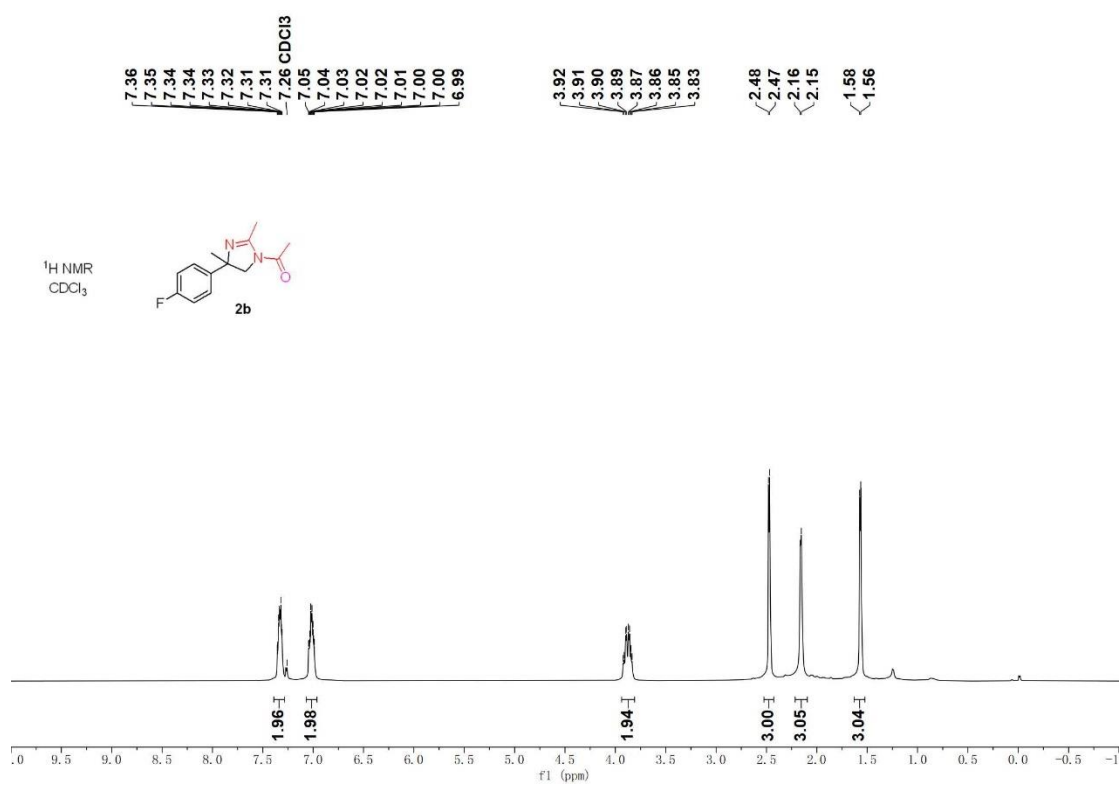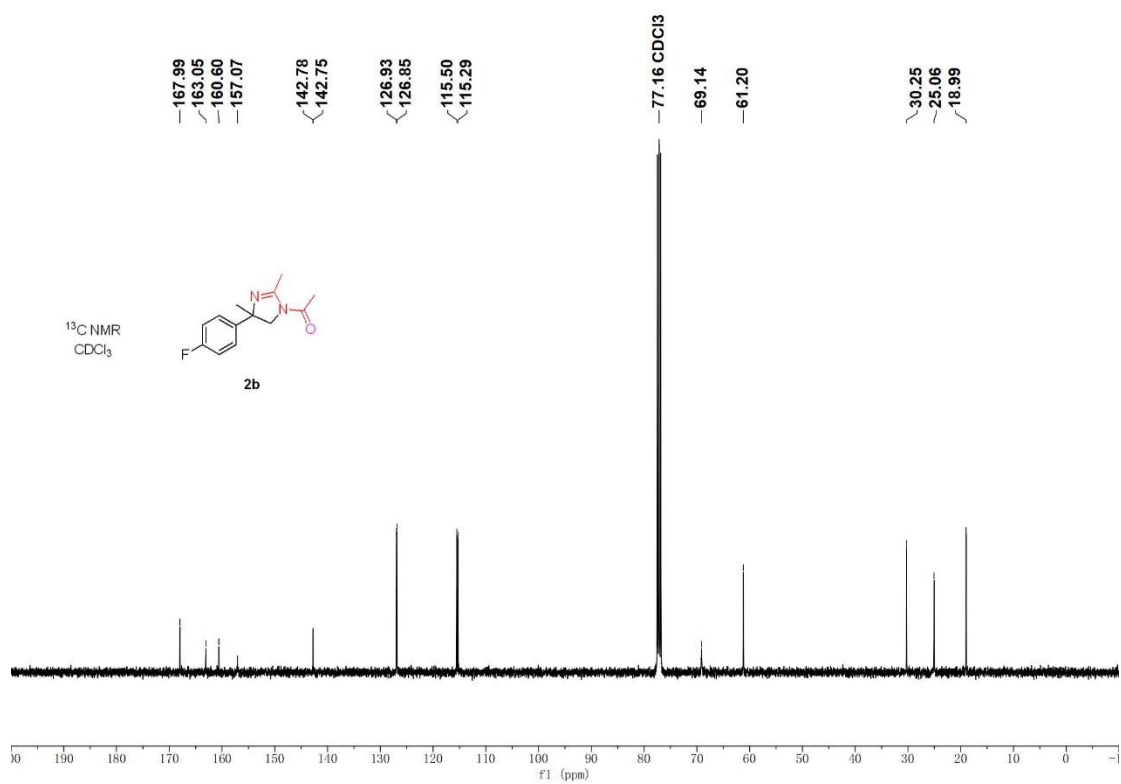

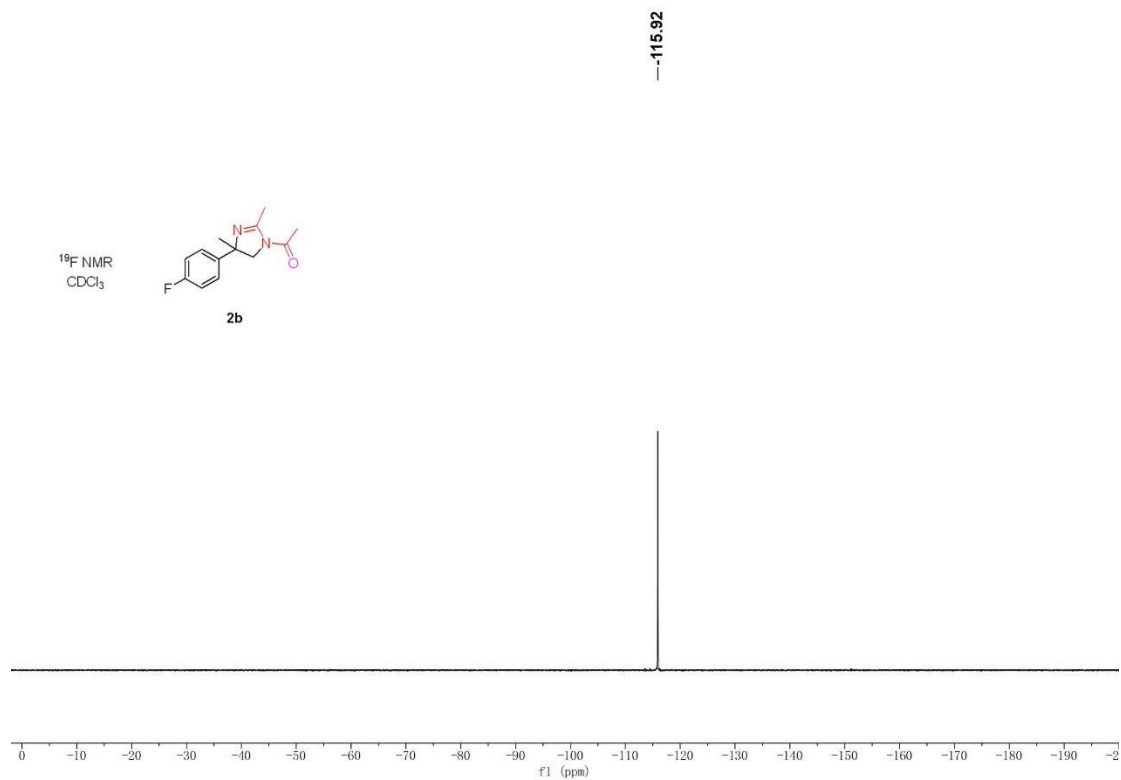

1-(4-(4-chlorophenyl)-2,4-dimethyl-4,5-dihydro-1H-imidazol-1-yl) ethan-1-one (2c)

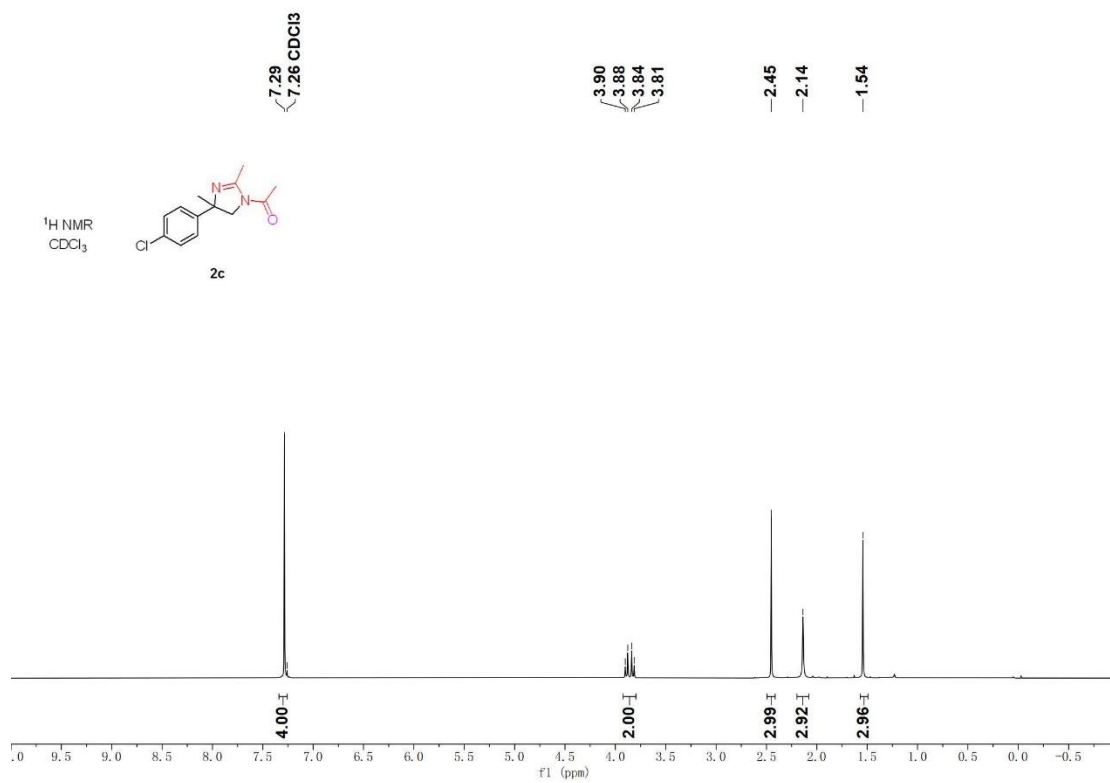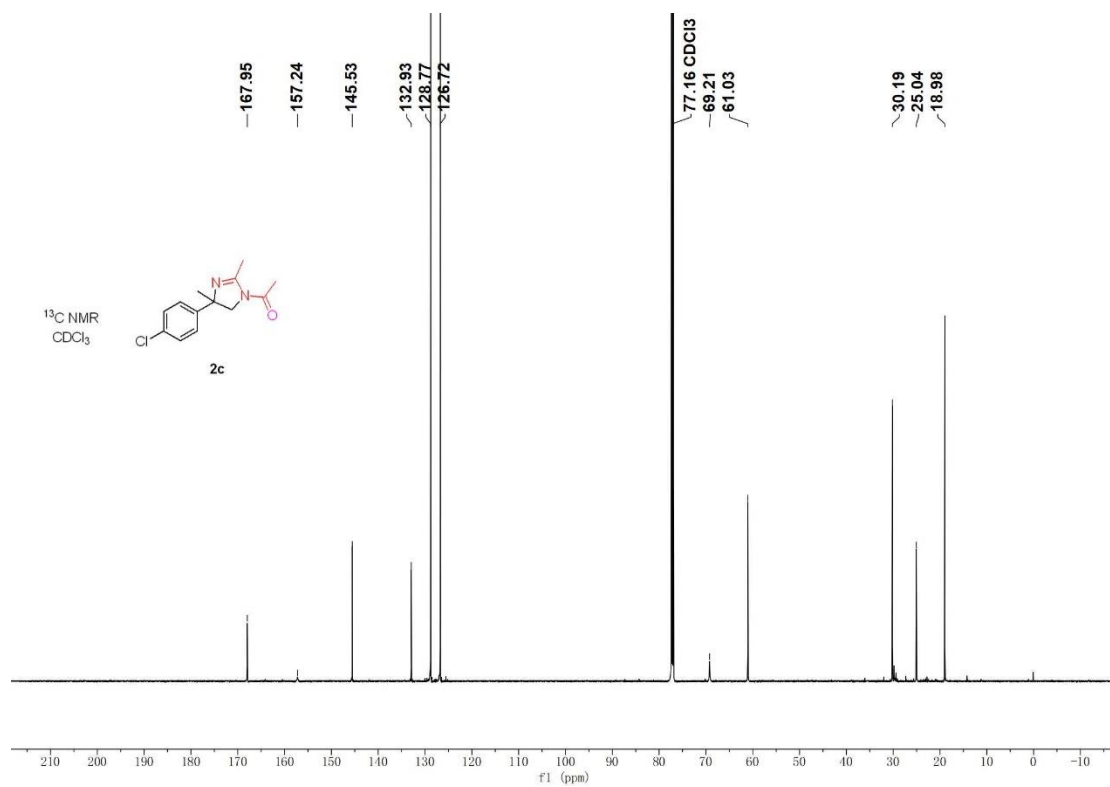

1-(4-(4-bromophenyl)-2,4-dimethyl-4,5-dihydro-1H-imidazol-1-yl) ethan-1-one (**2d**)

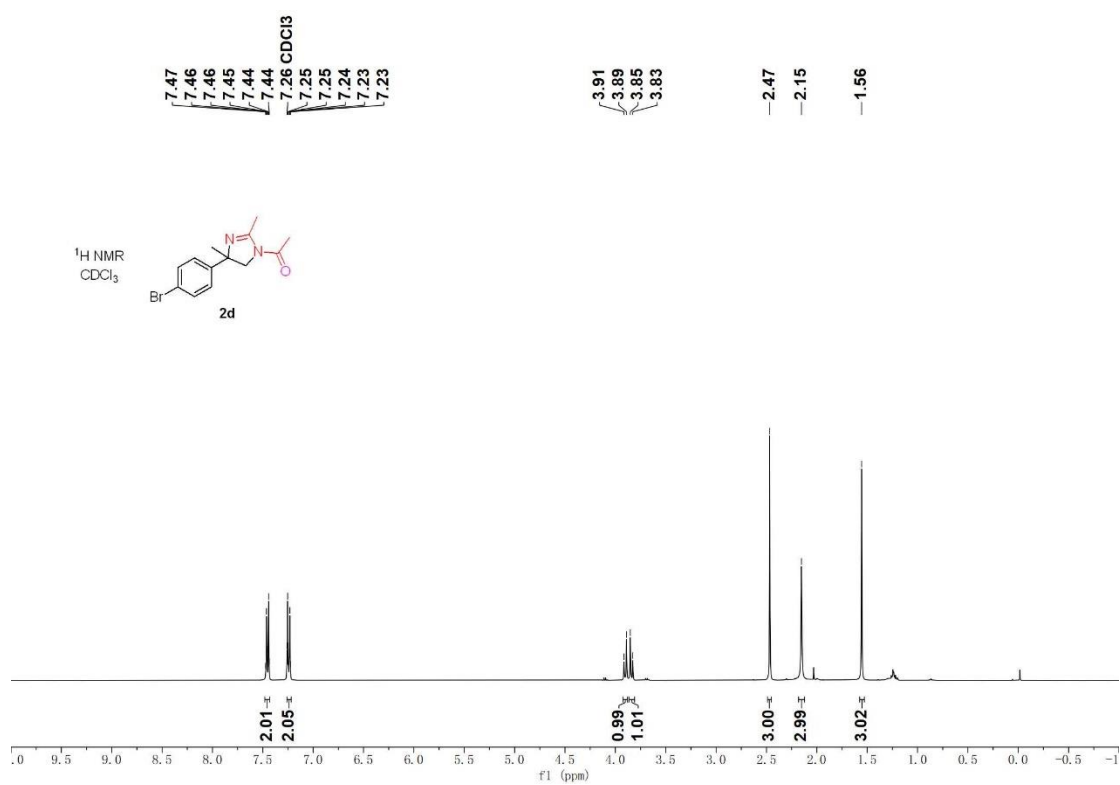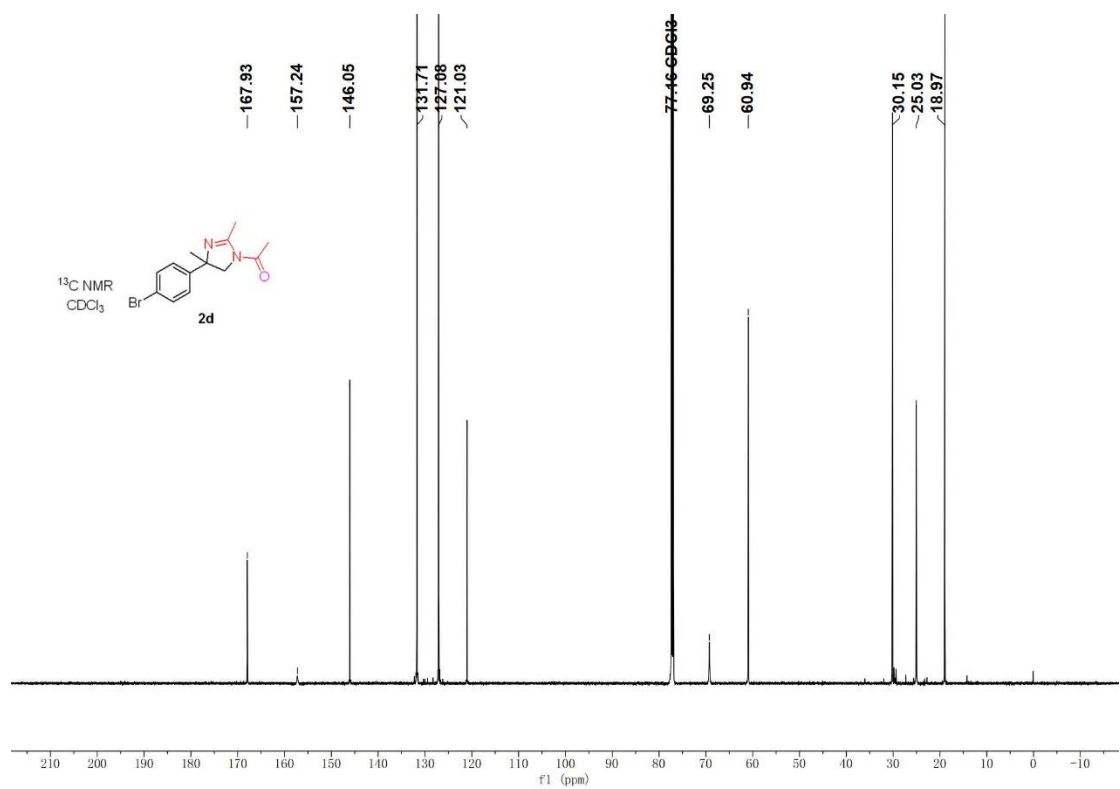

1-(2,4-dimethyl-4-(4-(trifluoromethyl) phenyl)-4,5-dihydro-1H-imidazol-1-yl) ethan-1-one (2e)

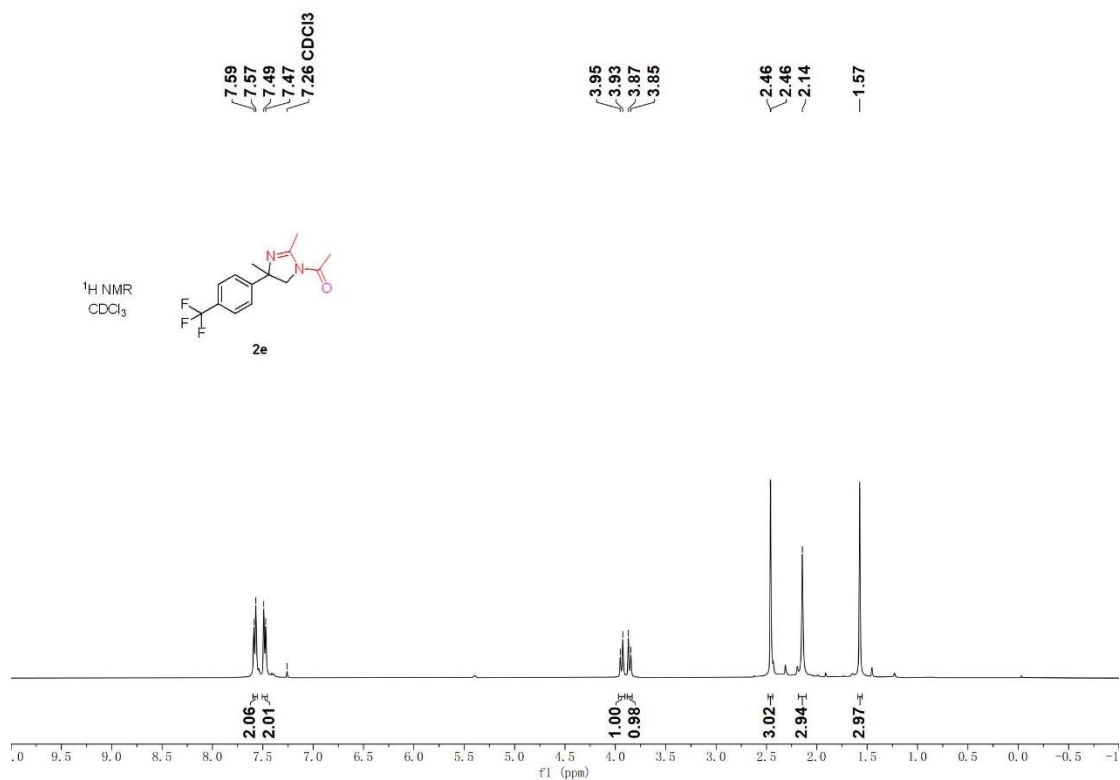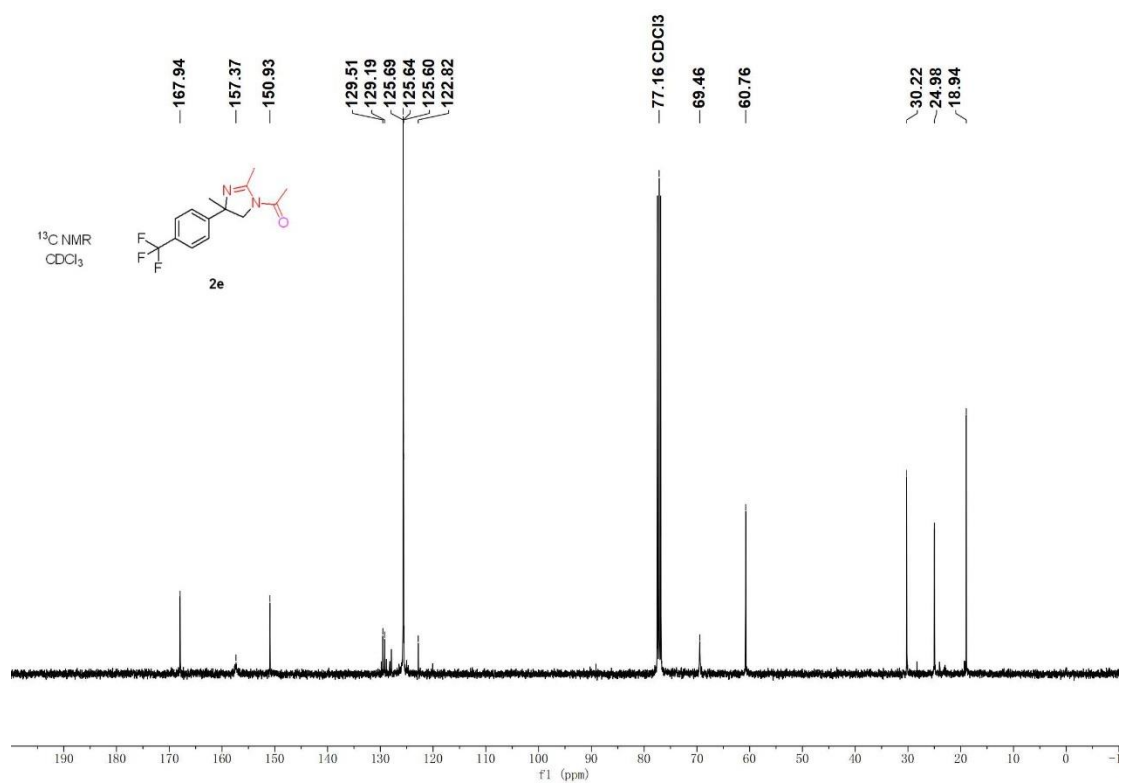

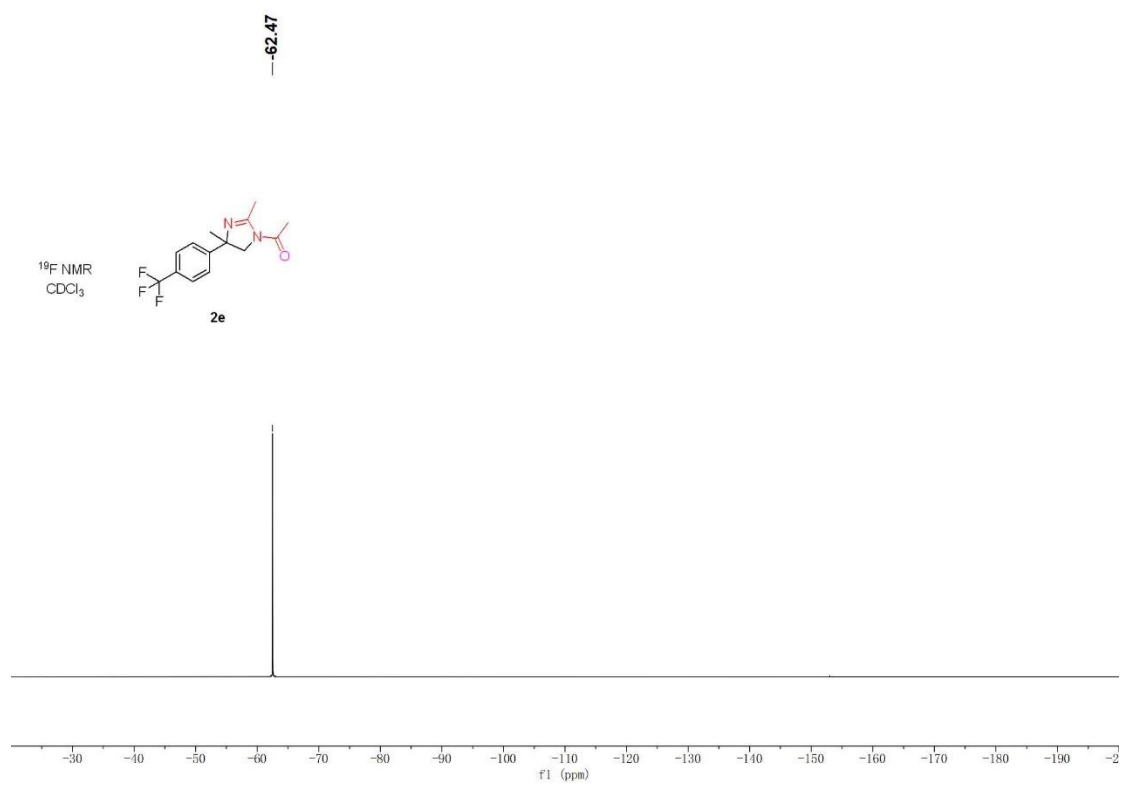

1-(2,4-dimethyl-4-(4-nitrophenyl)-4,5-dihydro-1H-imidazol-1-yl) ethan-1-one (**2f**)

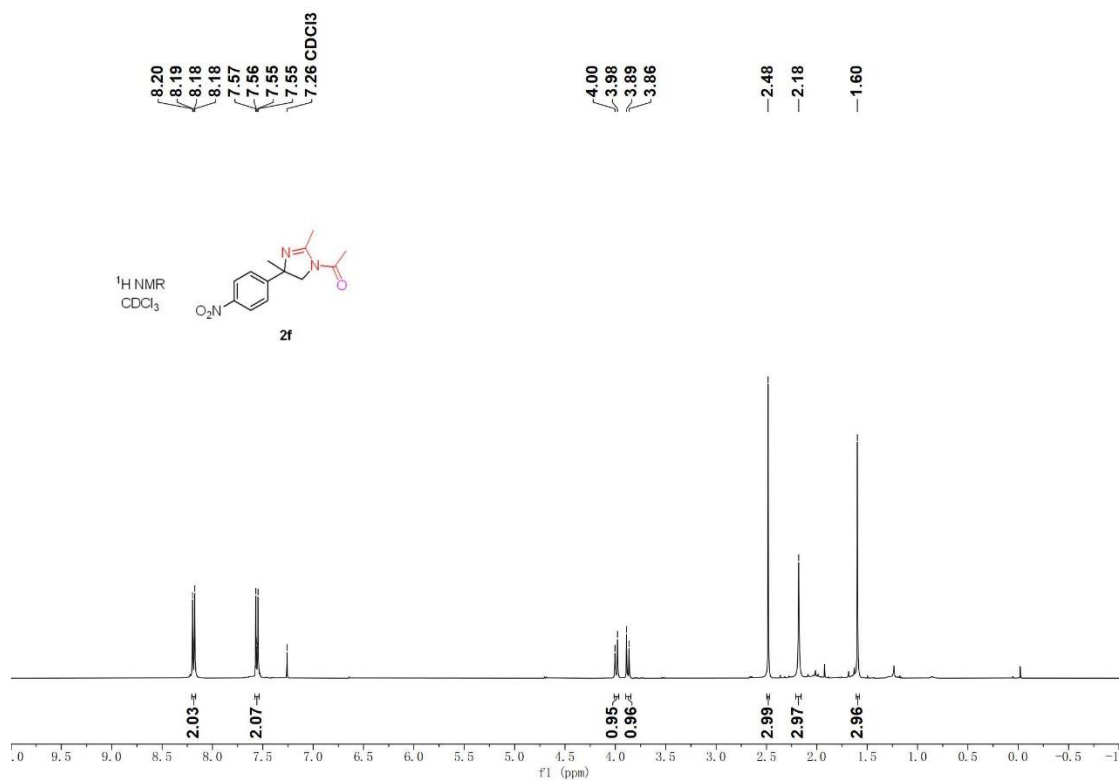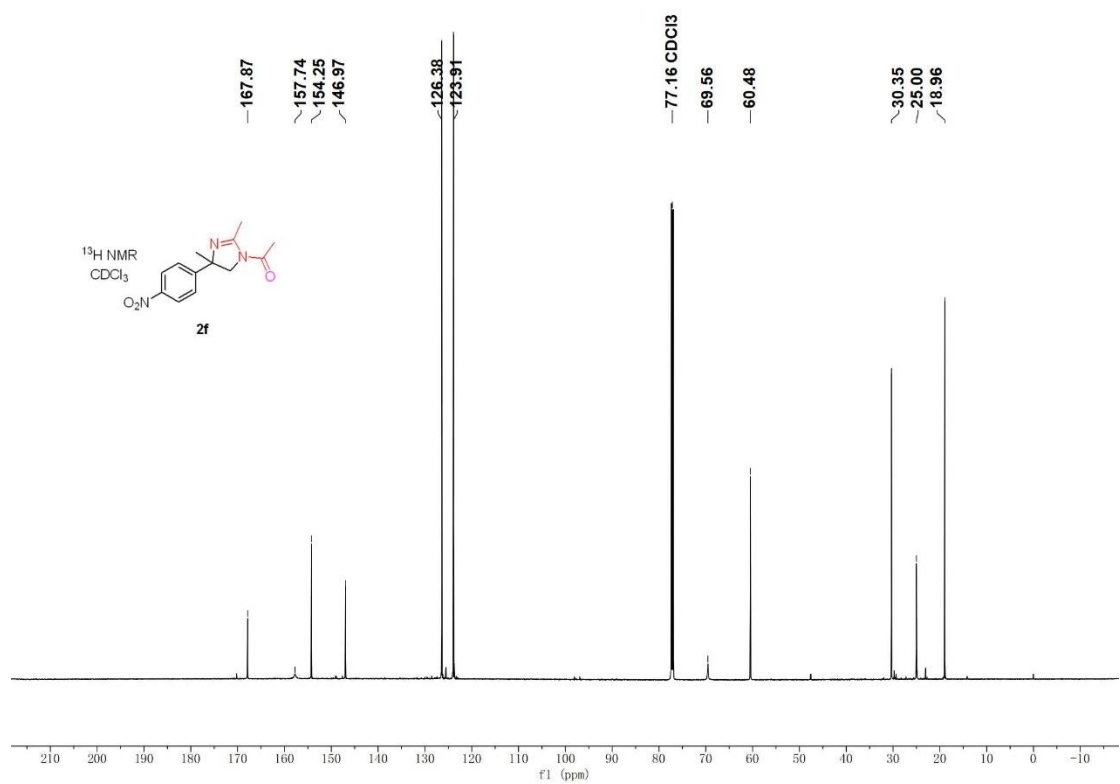

1-(4-(3-fluorophenyl)-2,4-dimethyl-4,5-dihydro-1H-imidazol-1-yl) ethan-1-one (**2g**)

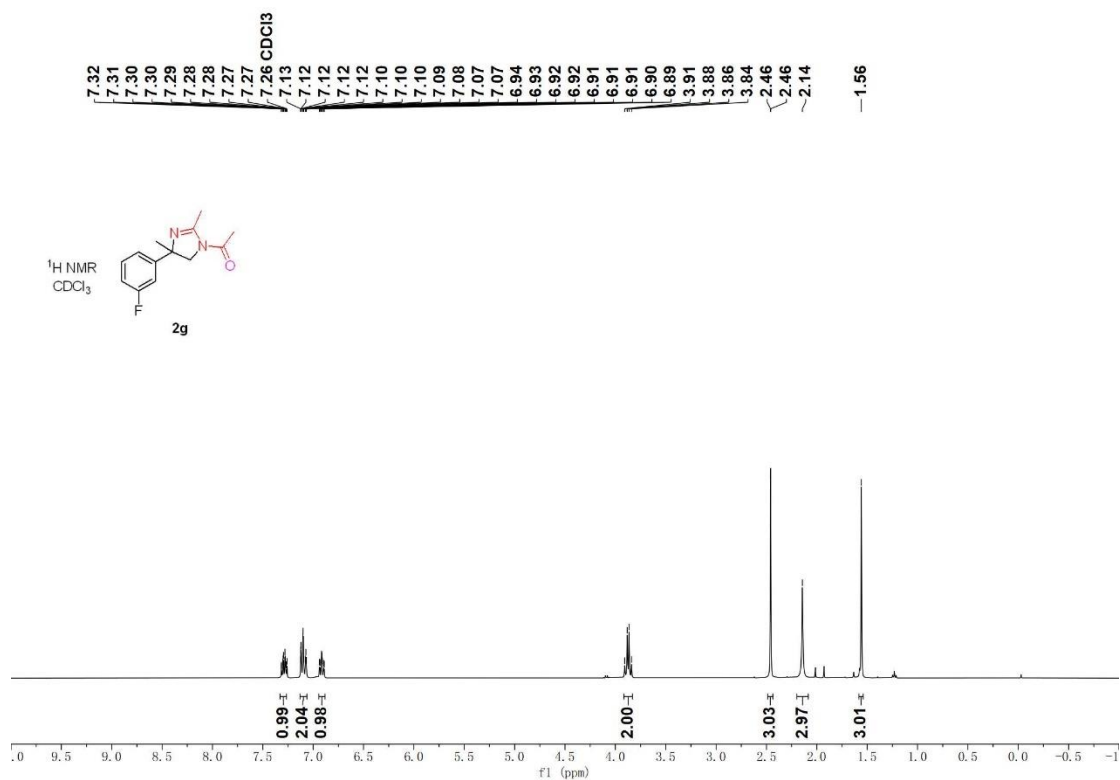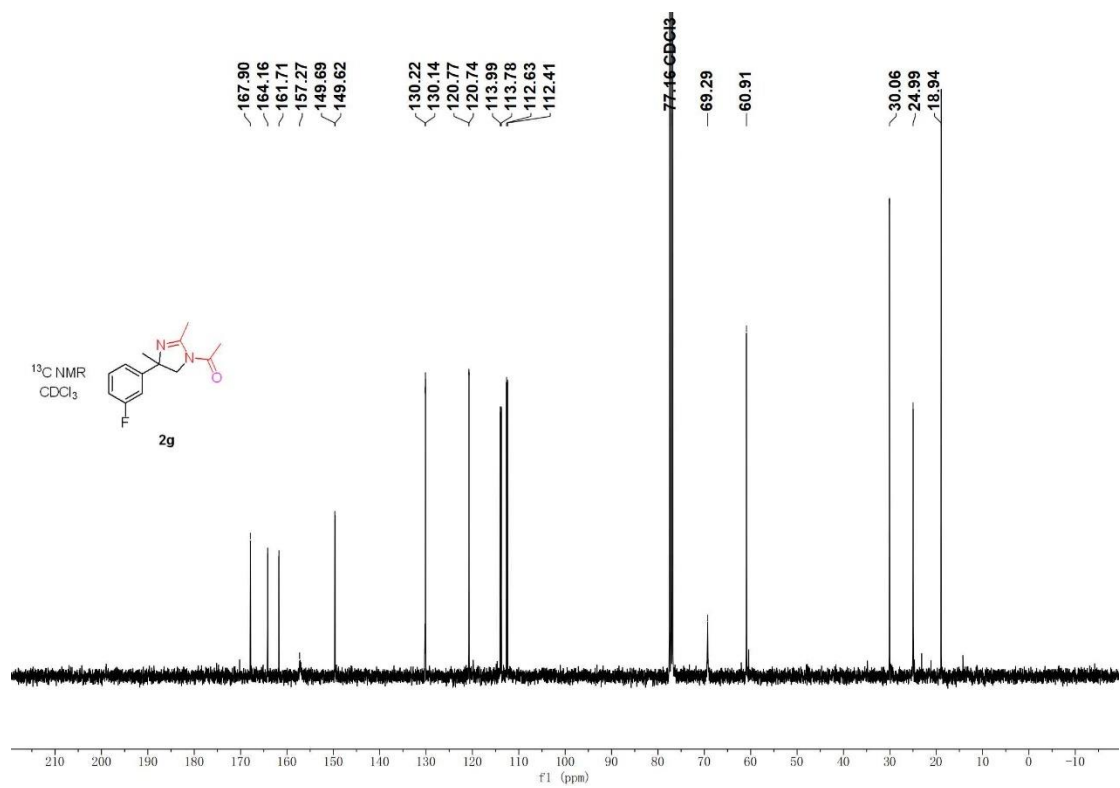



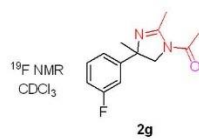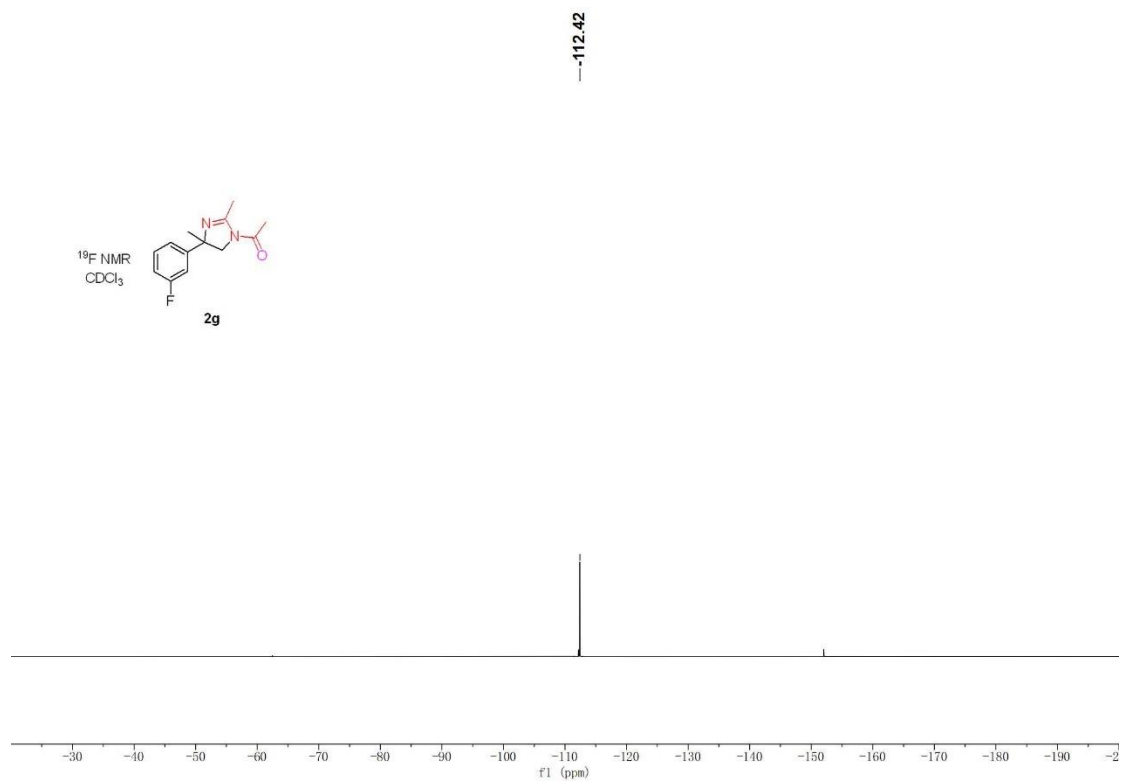

1-(4-(3-bromophenyl)-2,4-dimethyl-4,5-dihydro-1H-imidazol-1-yl) ethan-1-one (**2h**)

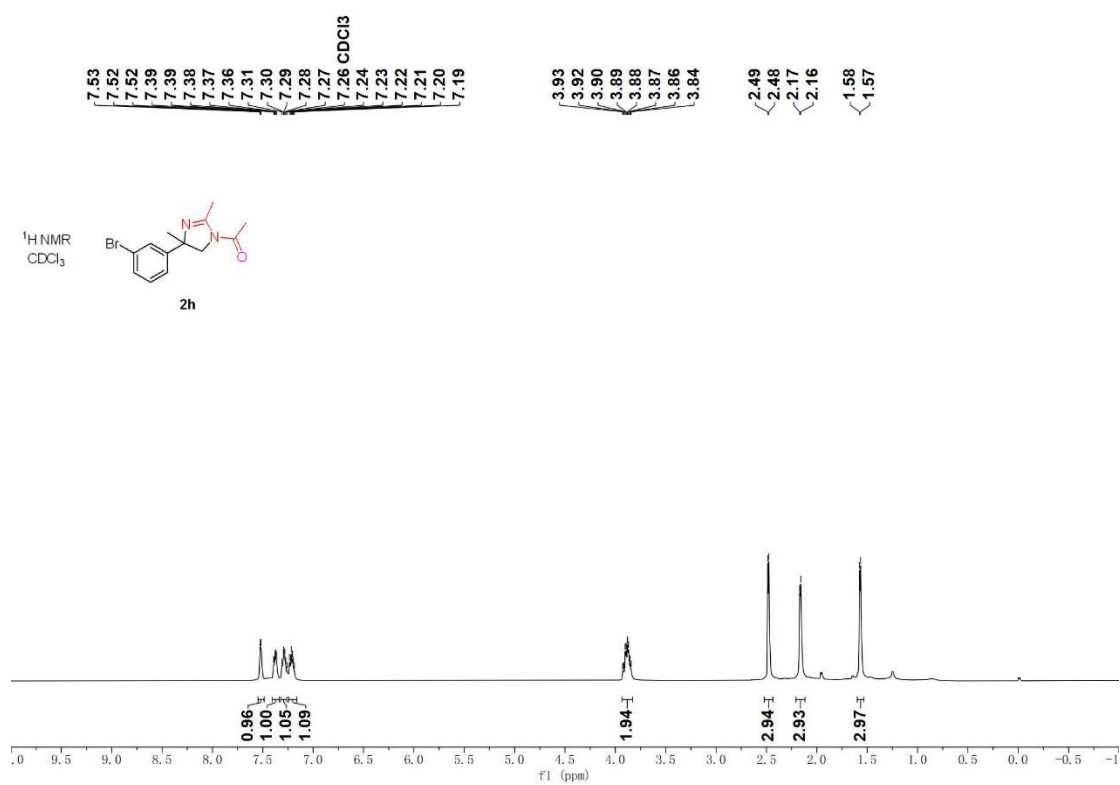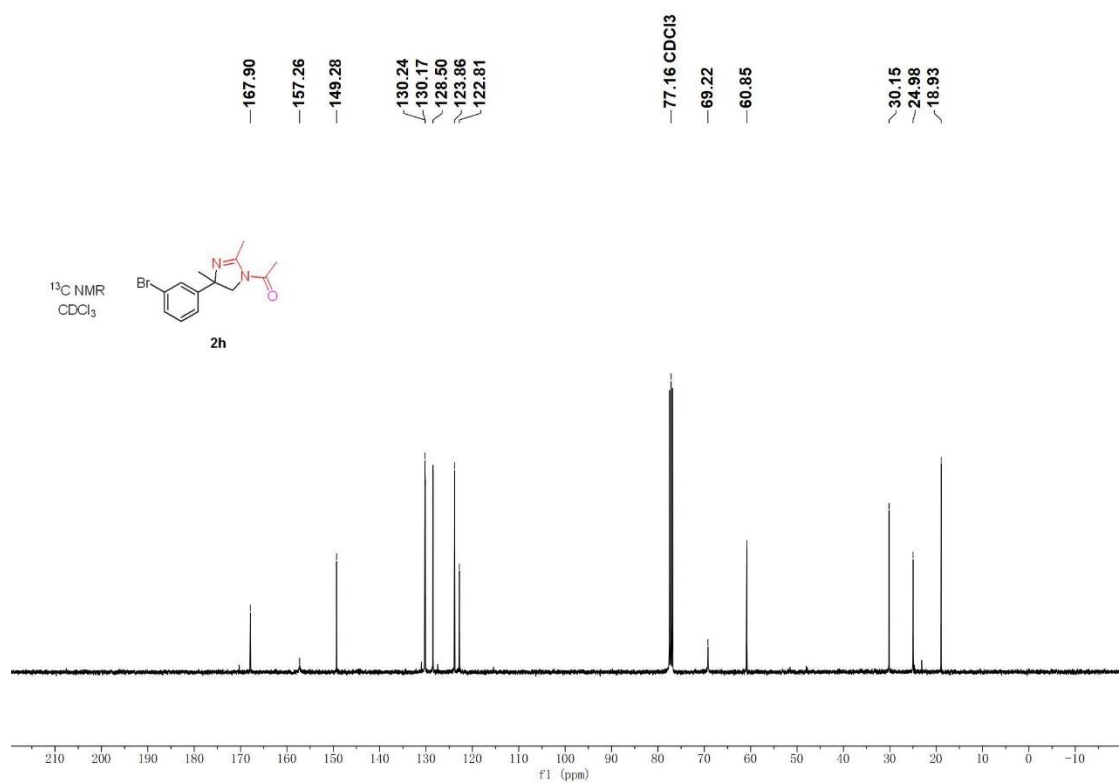

1-(4-(2-chlorophenyl)-2,4-dimethyl-4,5-dihydro-1H-imidazol-1-yl) ethan-1-one (**2i**)

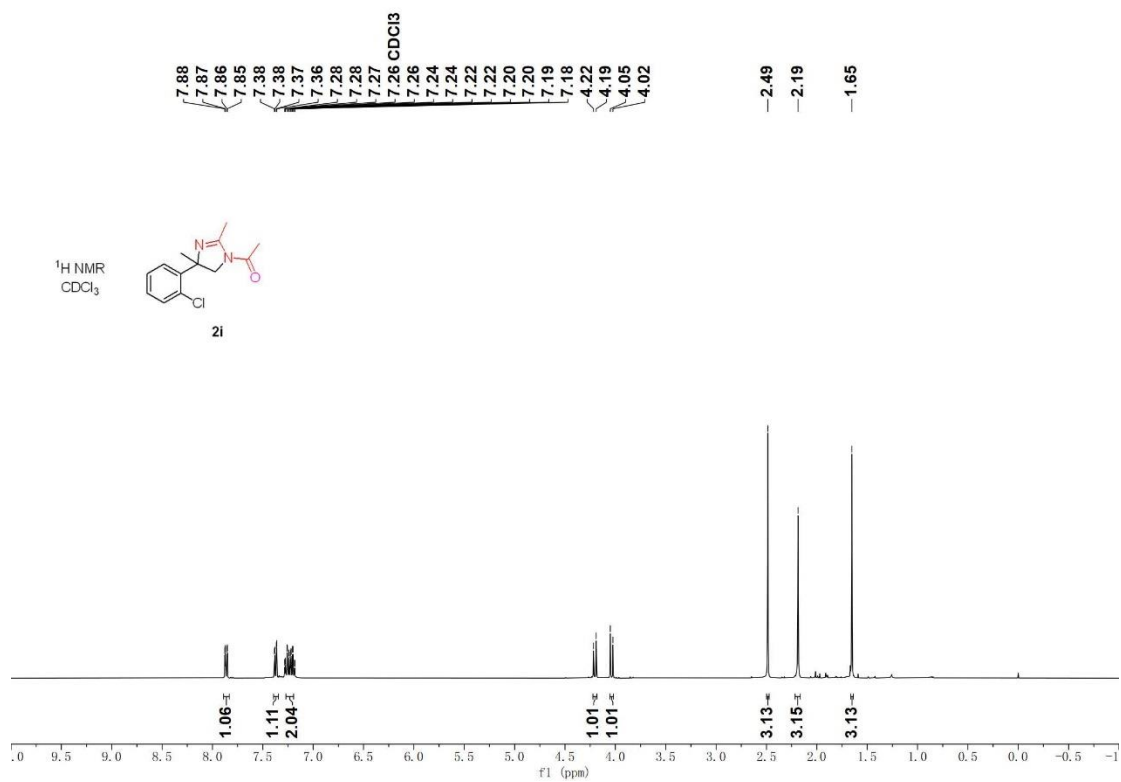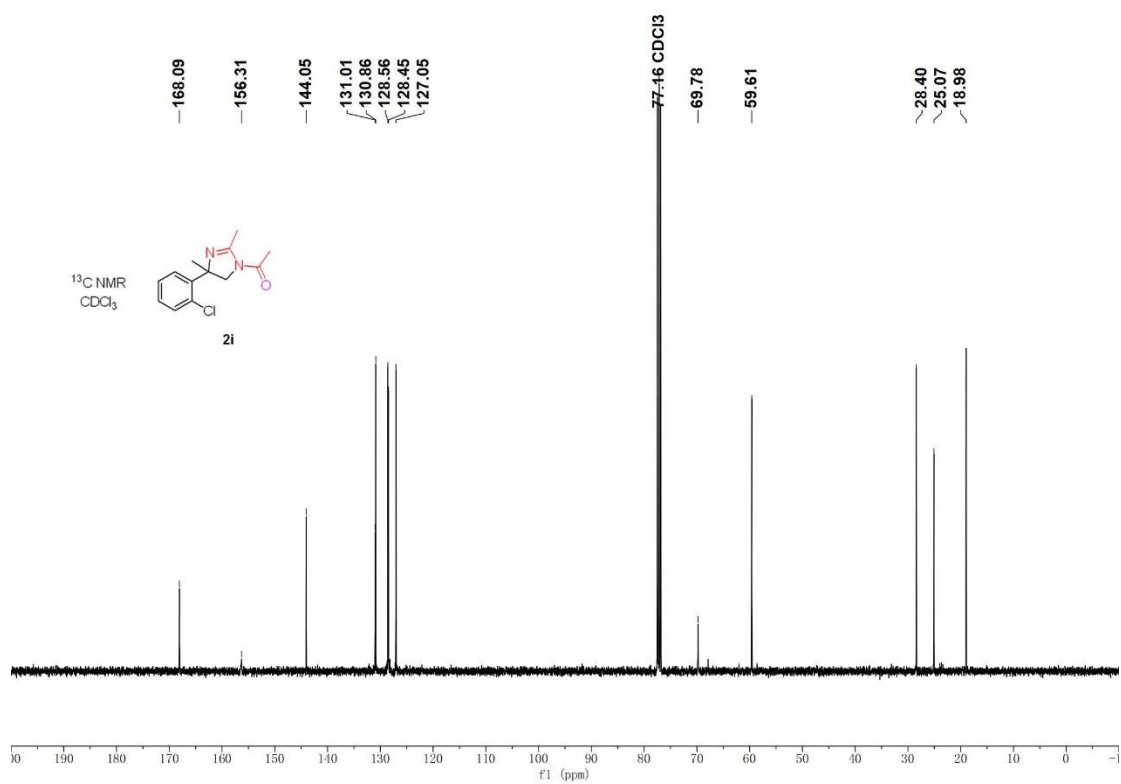

1-(2,4-dimethyl-4-(m-tolyl)-4,5-dihydro-1H-imidazol-1-yl) ethan-1-one (2j)

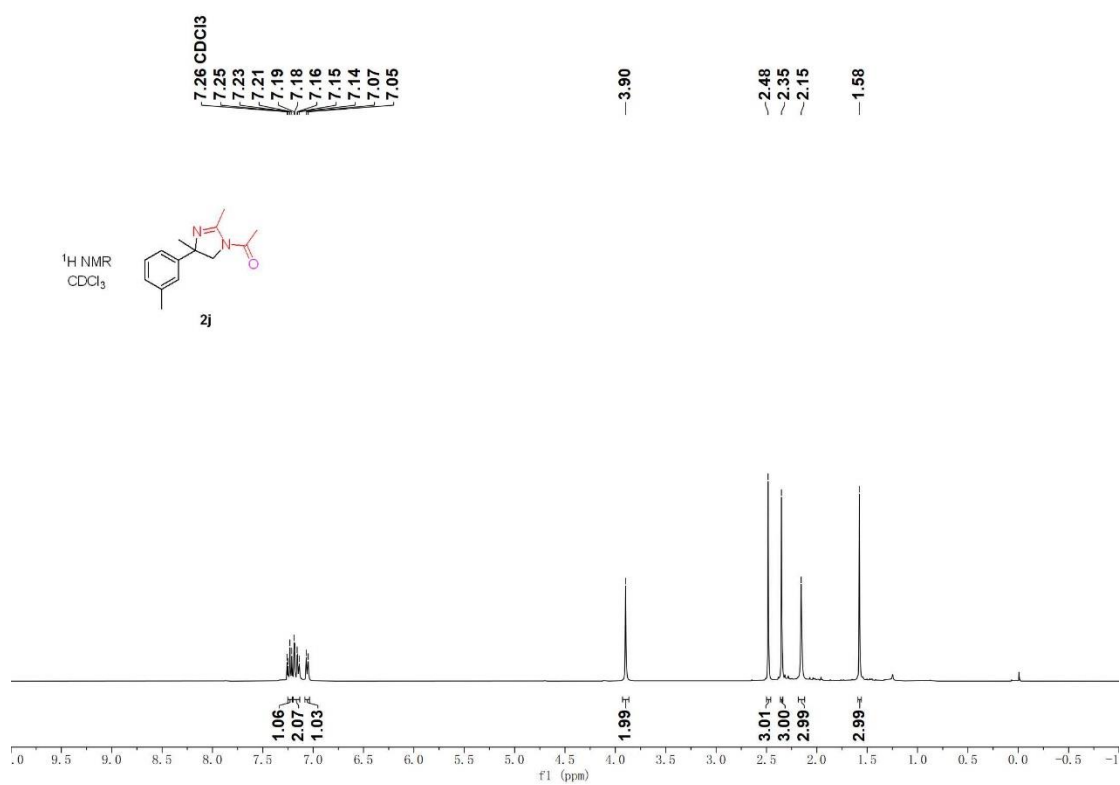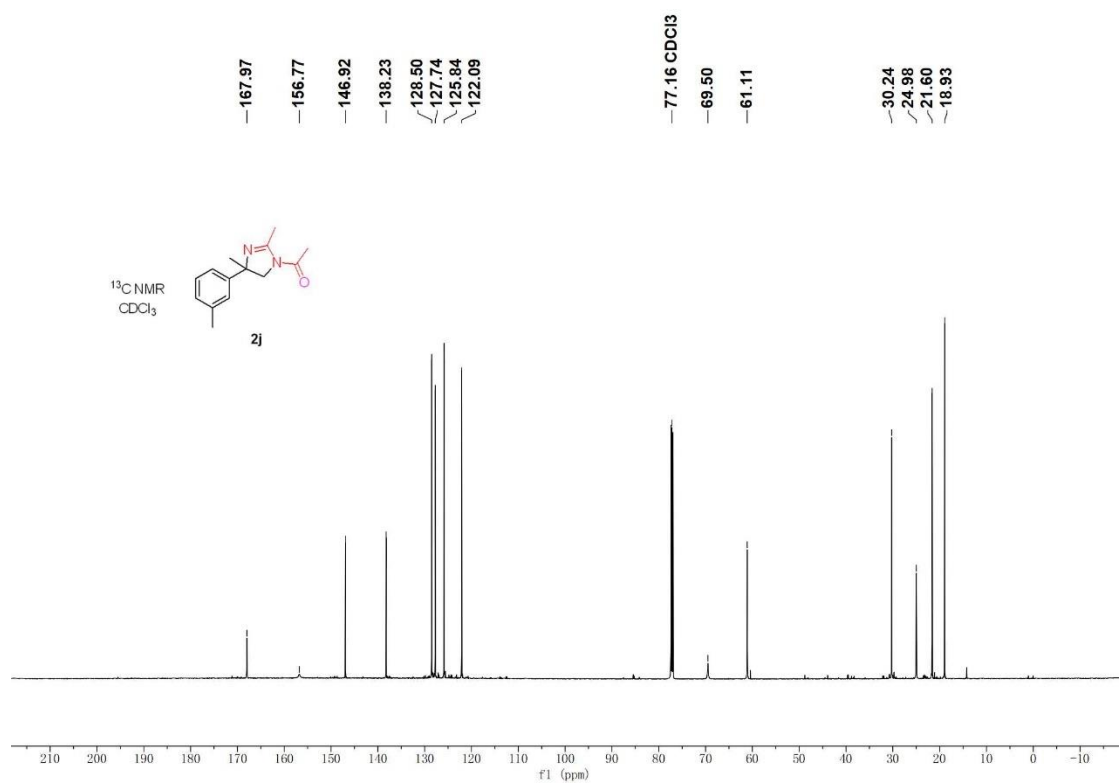

1-(4-methyl-4-phenyl-2-propyl-4,5-dihydro-1H-imidazol-1-yl) butan-1-one (**2k**)

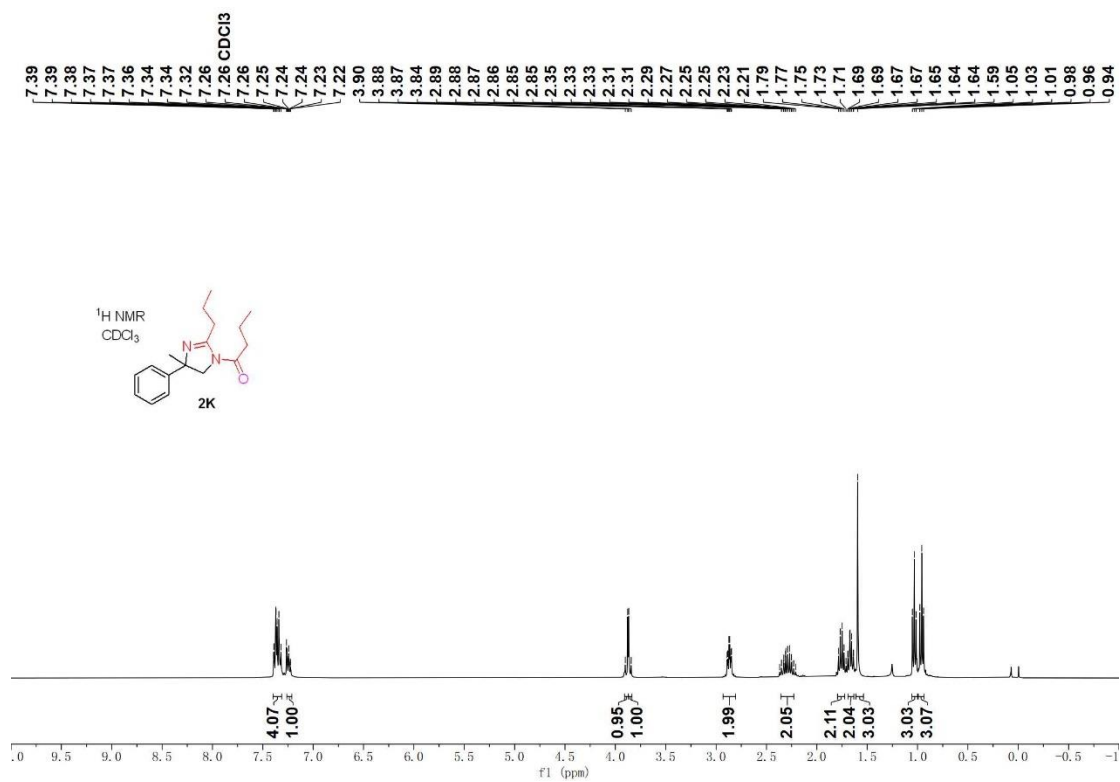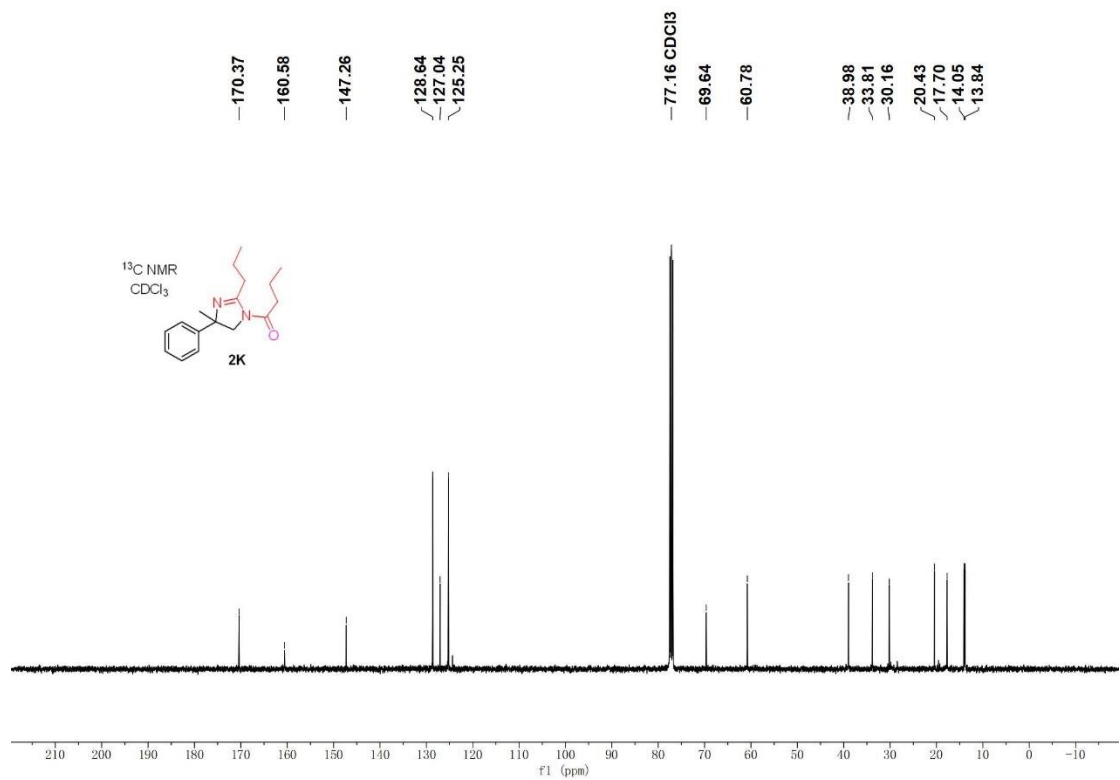

1-(4-(3-chlorophenyl)-4-ethyl-2-methyl-4,5-dihydro-1H-imidazol-1-yl) ethan-1-one (21)

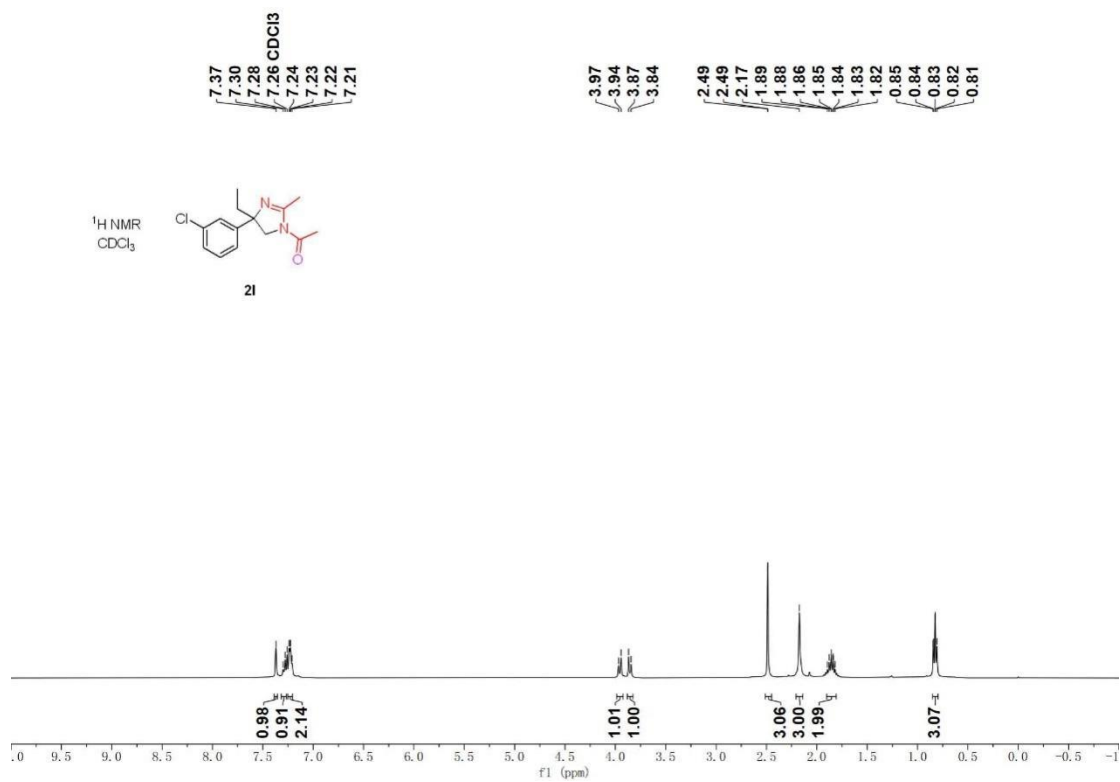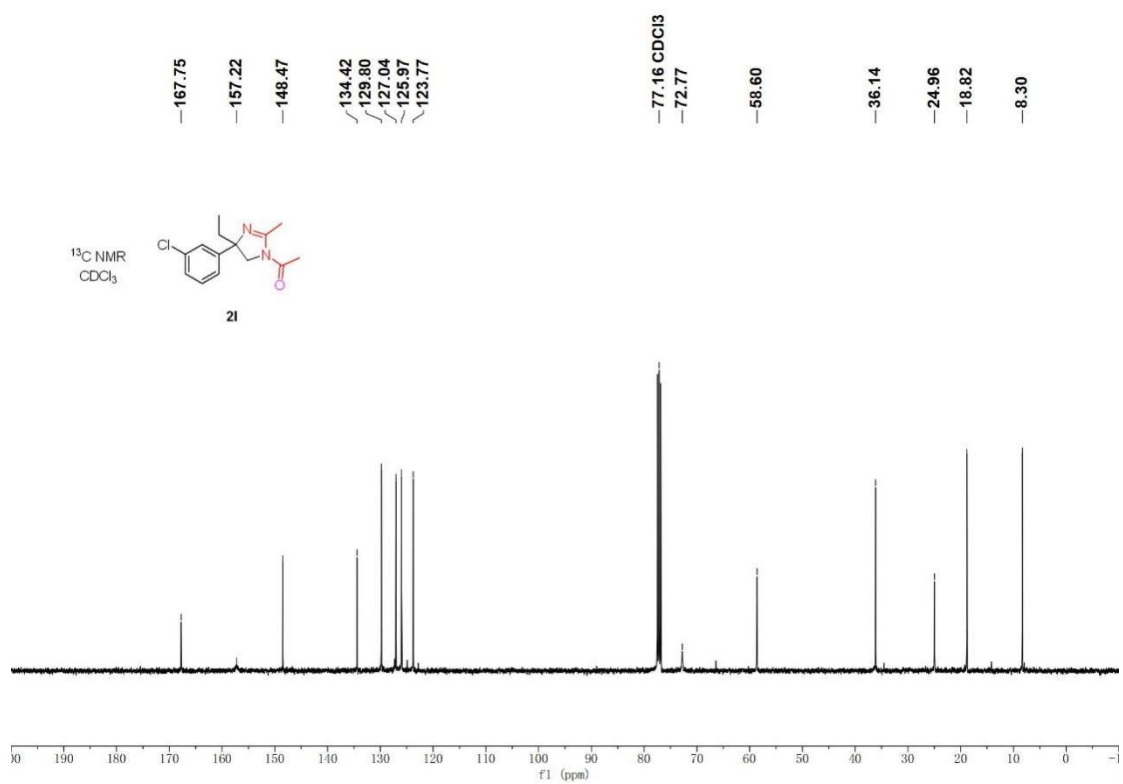

1-(2-methyl-4-phenyl-4-propyl-4,5-dihydro-1H-imidazol-1-yl) ethan-1-one (**2m**)

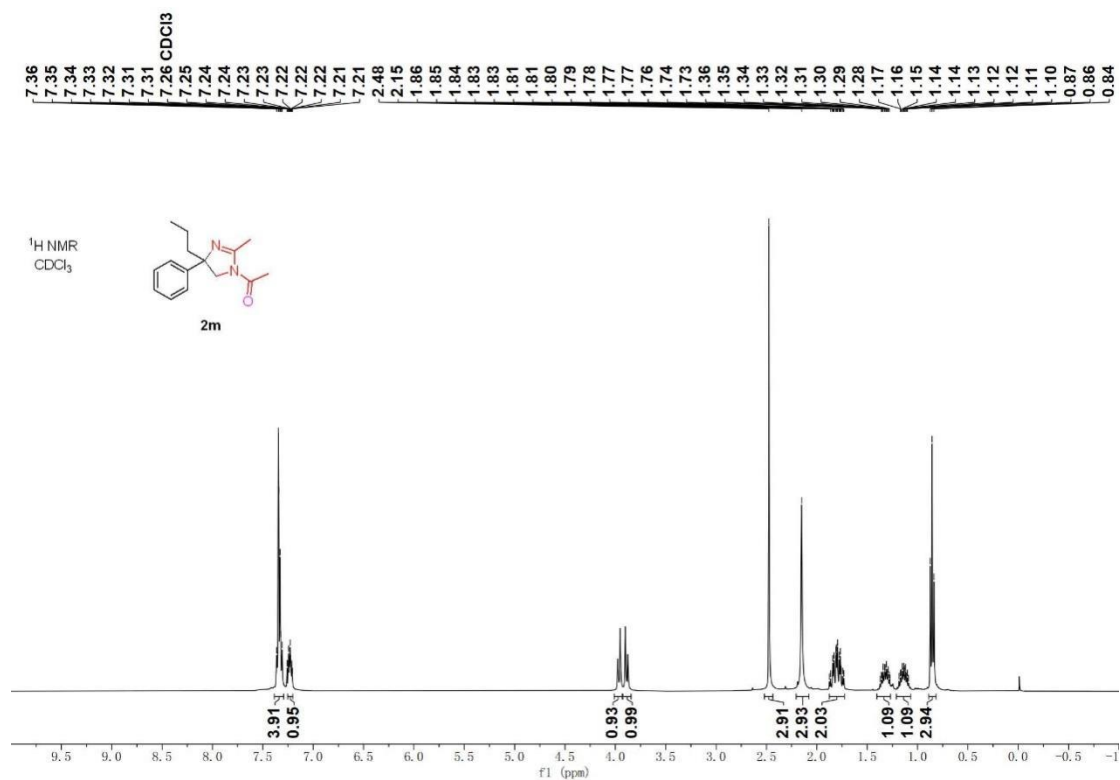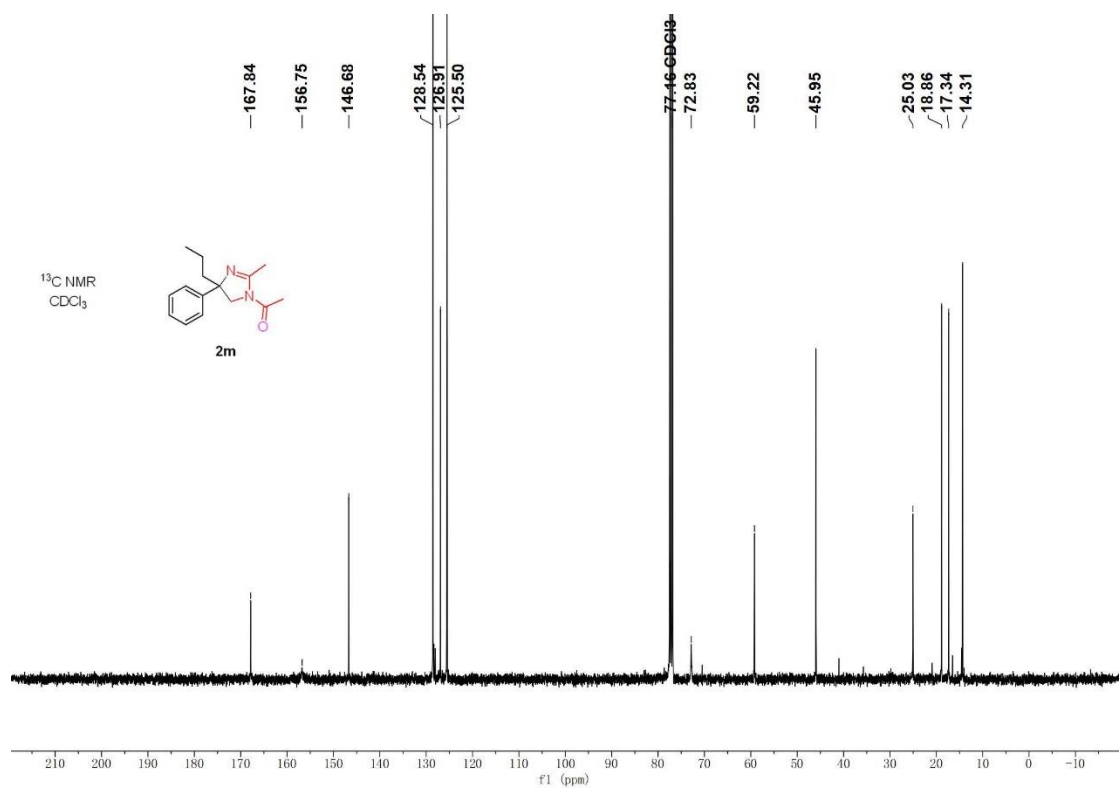

1-(2-methyl-4,4-diphenyl-4,5-dihydro-1H-imidazol-1-yl) ethan-1-one (**2n**)

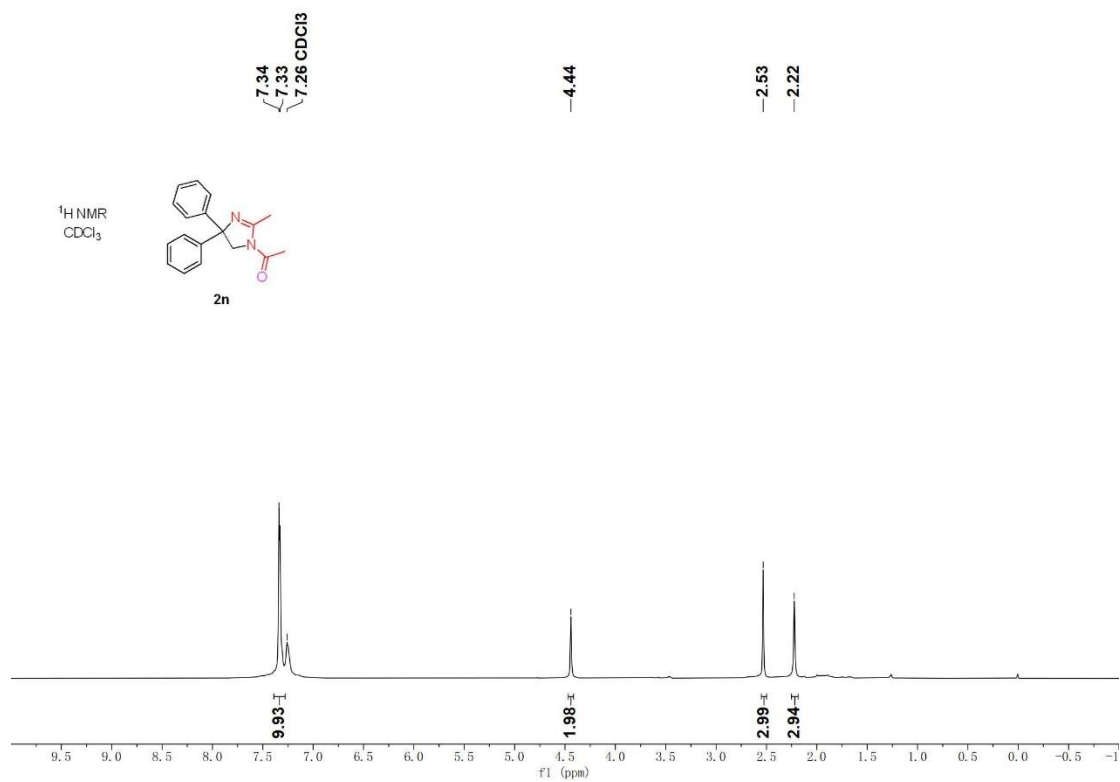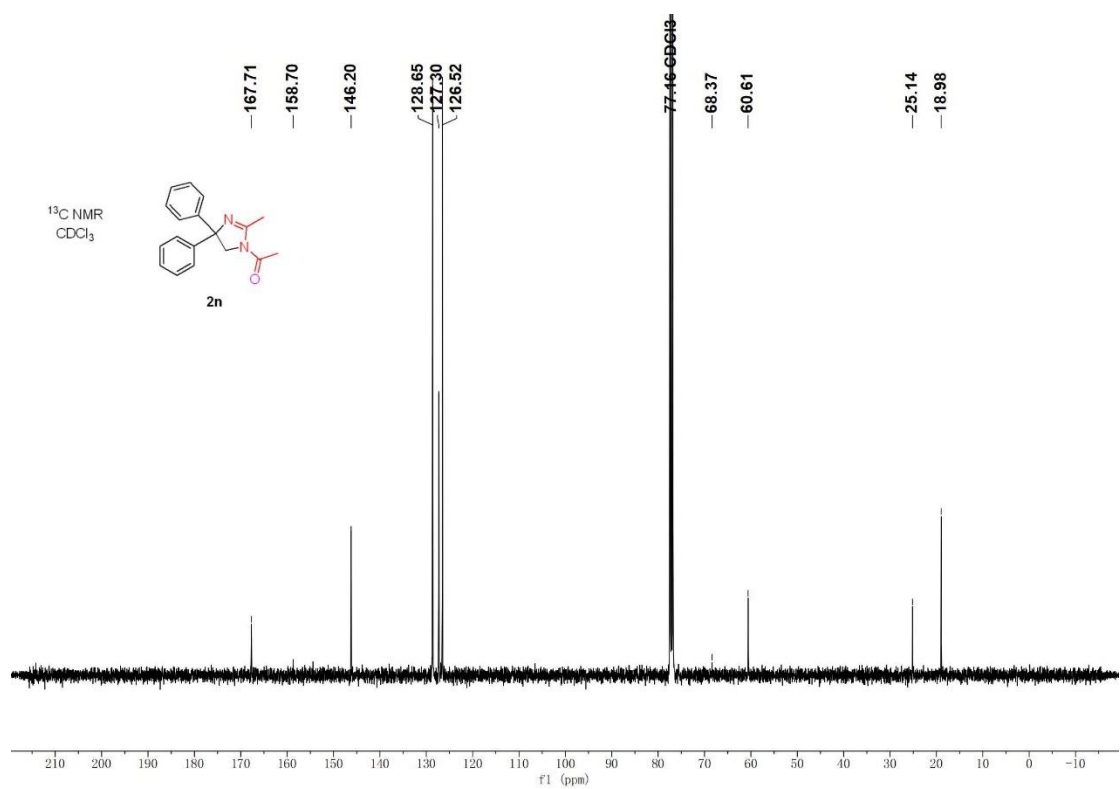



(1S,2R,5S)-2-isopropyl-5-methylcyclohexyl 4-(1-acetyl-2,4-dimethyl-4,5-dihydro-1H-imidazol-4-yl) benzoate (**2o**)

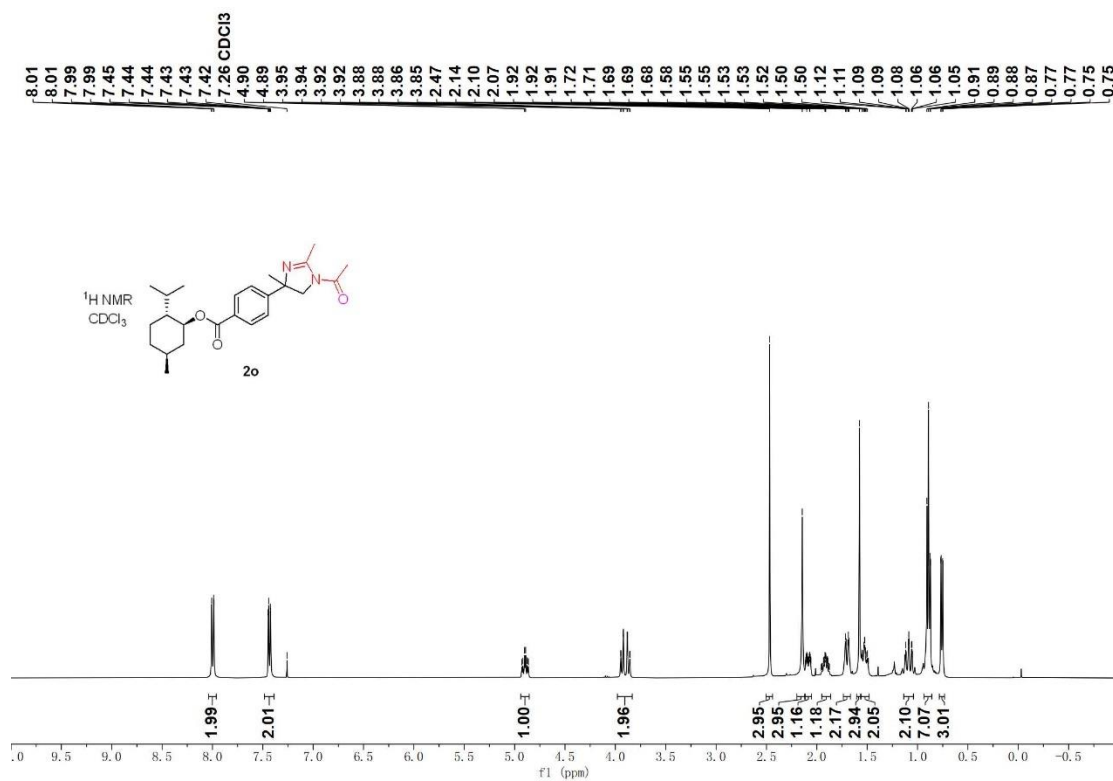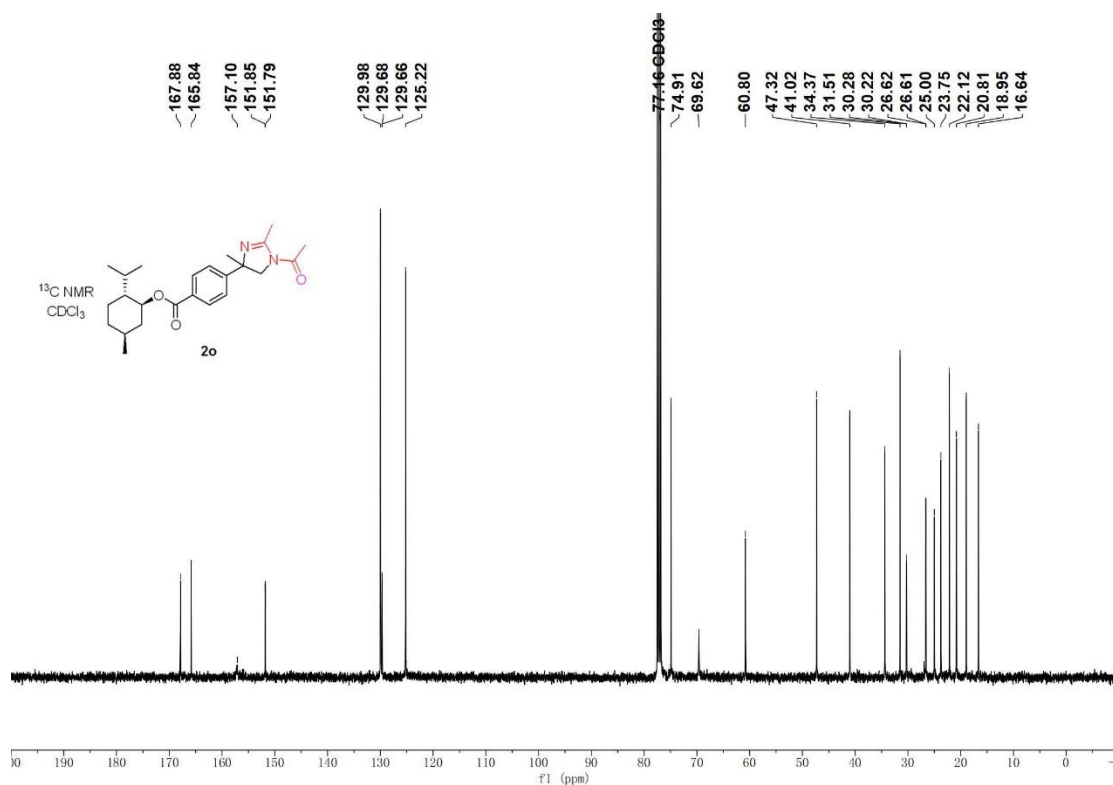

Adamantan-1-ylmethyl 4-(1-acetyl-2,4-dimethyl-4,5-dihydro-1H-imidazol-4-yl) benzoate (**2p**)

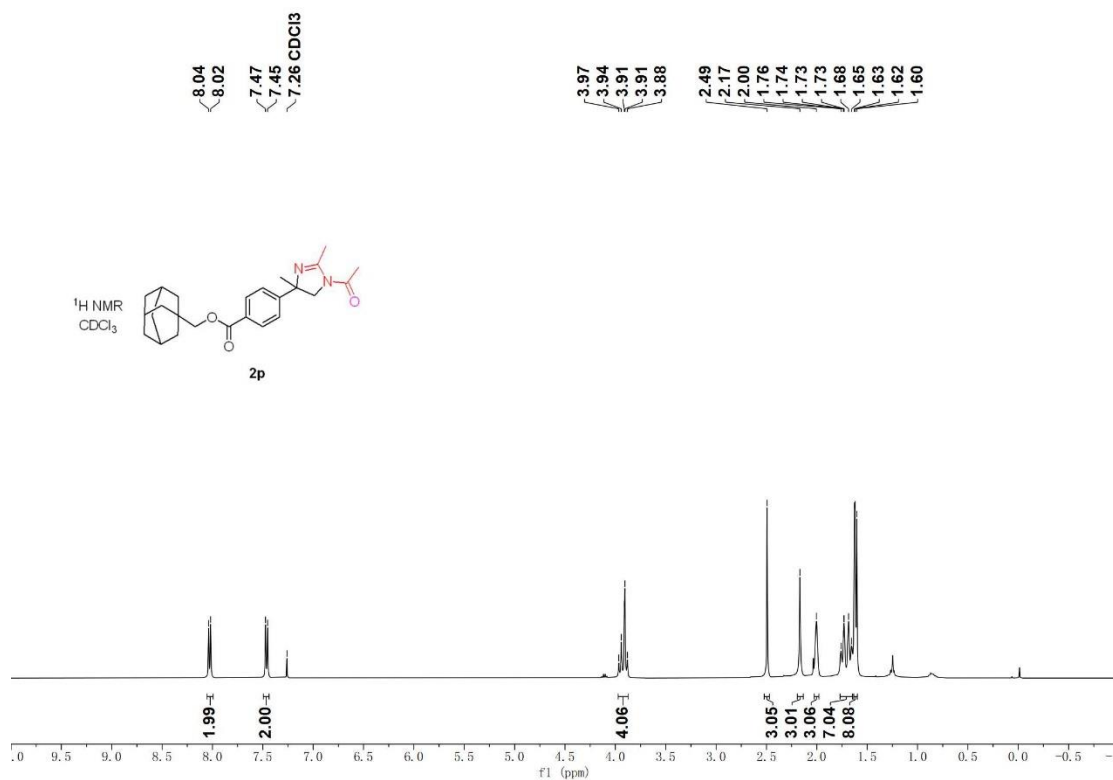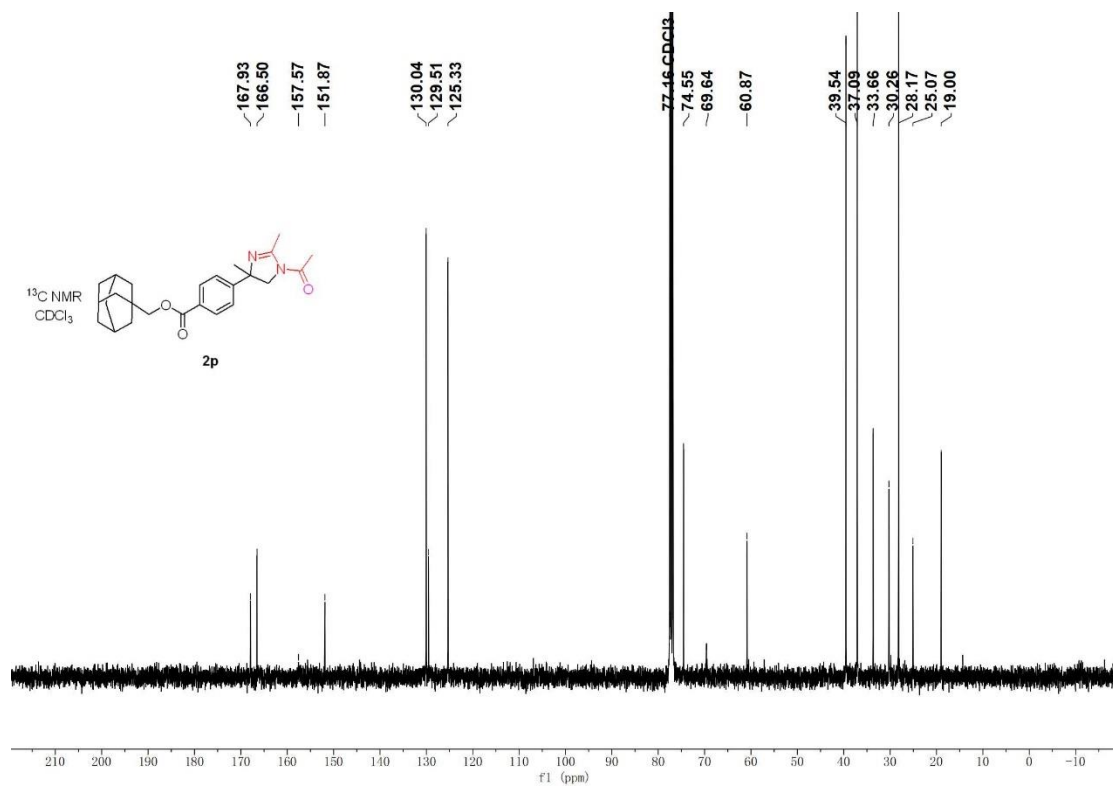

Cyclododecyl 4-(1-acetyl-2,4-dimethyl-4,5-dihydro-1H-imidazol-4-yl) benzoate (**2q**)

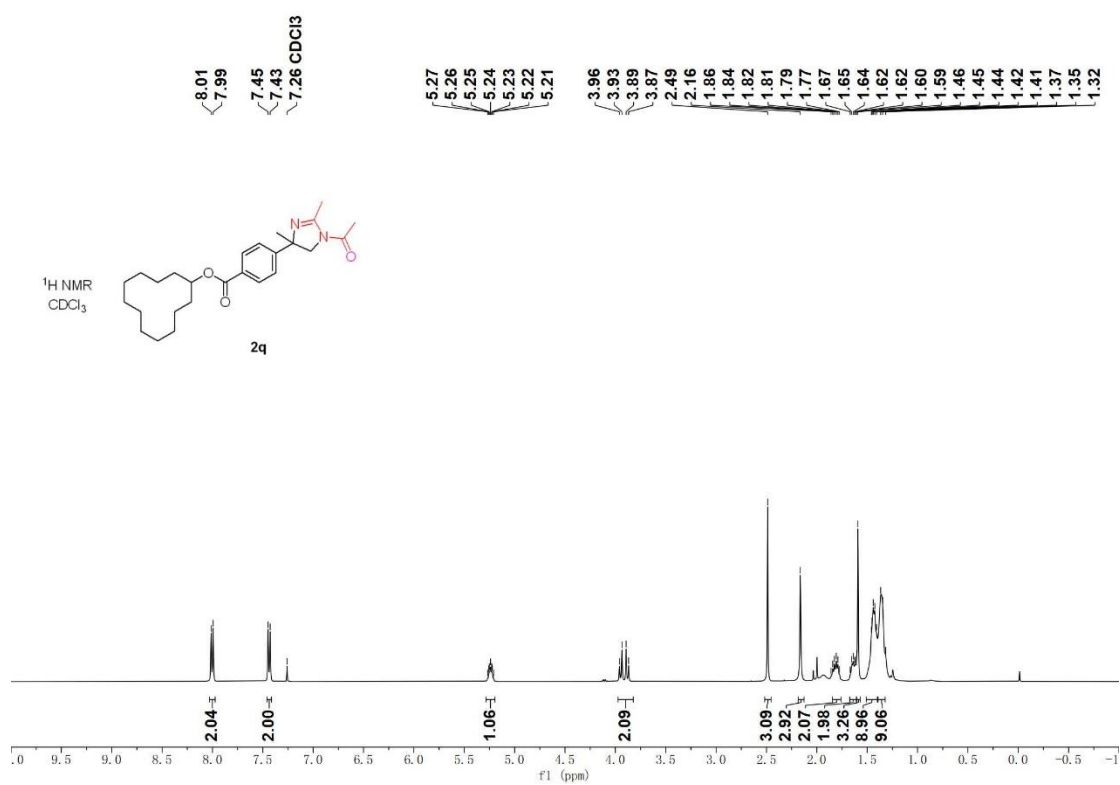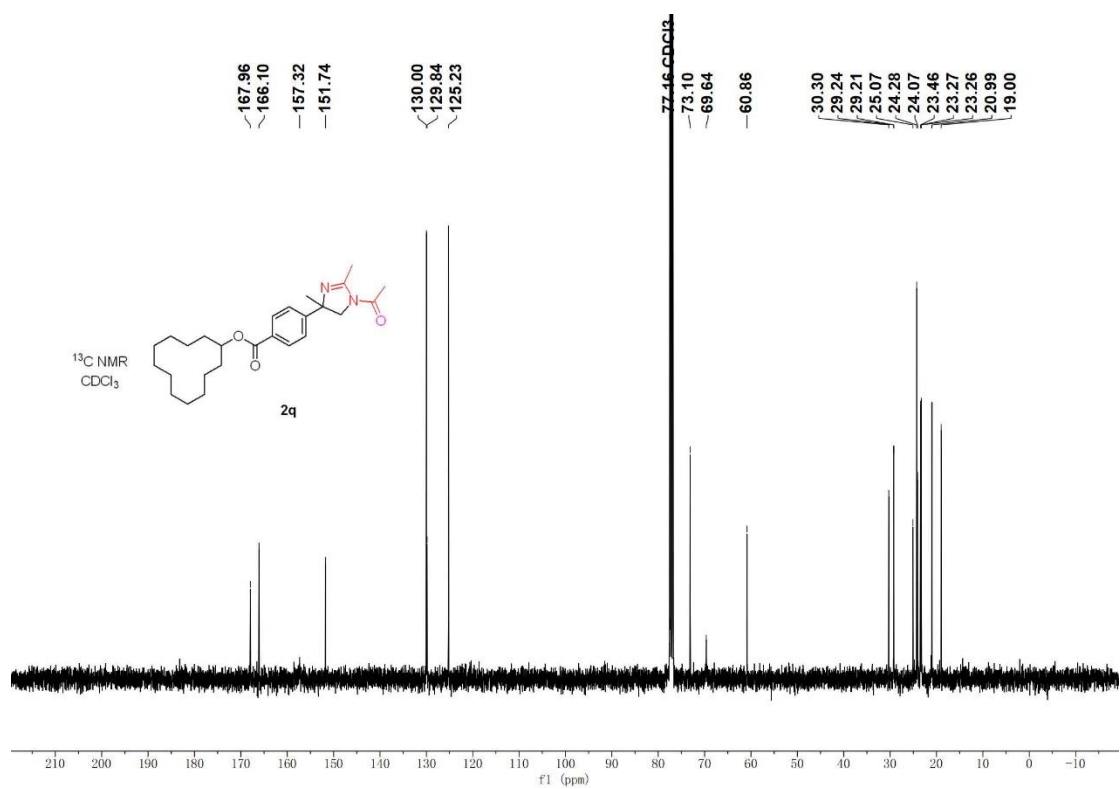

1-(2-methyl-4-phenyl-4,5-dihydro-1H-imidazol-1-yl) ethan-1-one (**4a**)

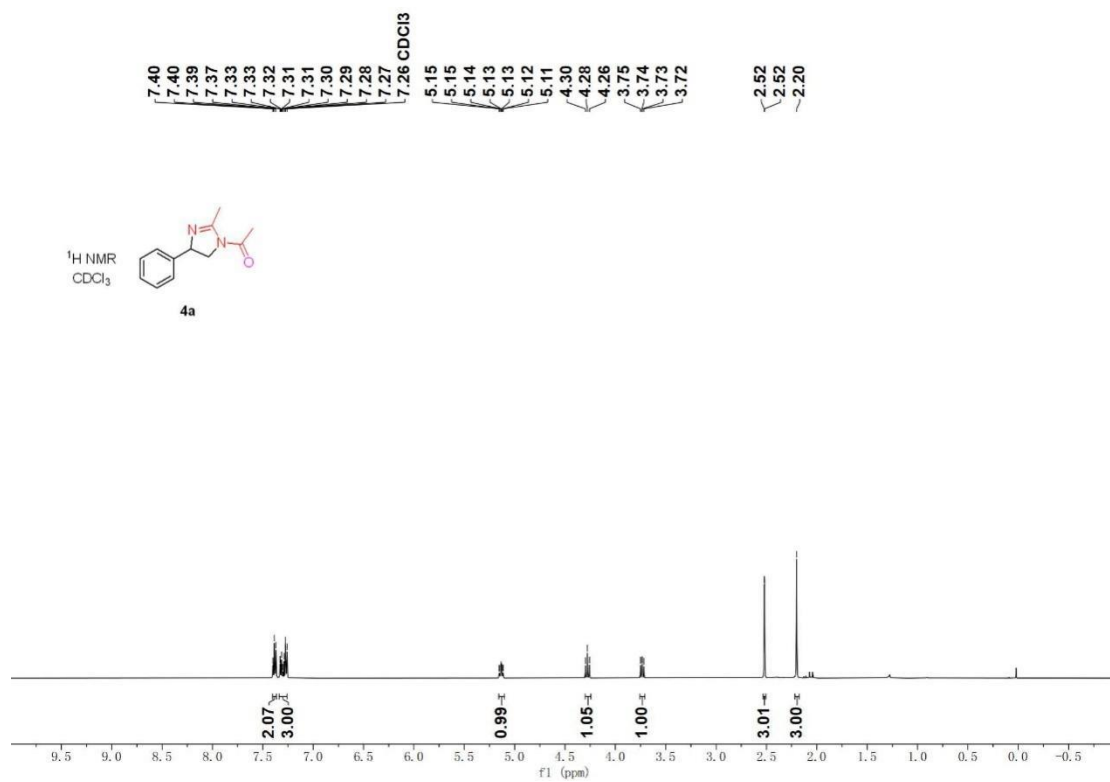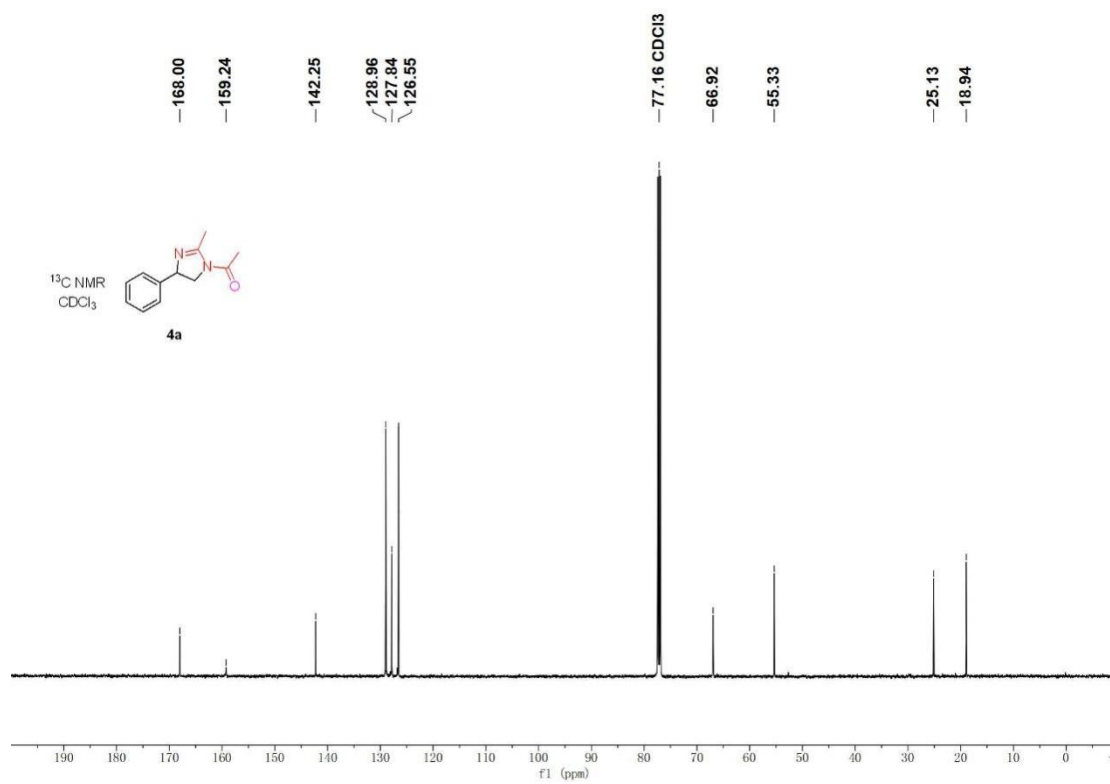

1-(4-(4-fluorophenyl)-2-methyl-4,5-dihydro-1H-imidazol-1-yl) ethan-1-one (**4b**)

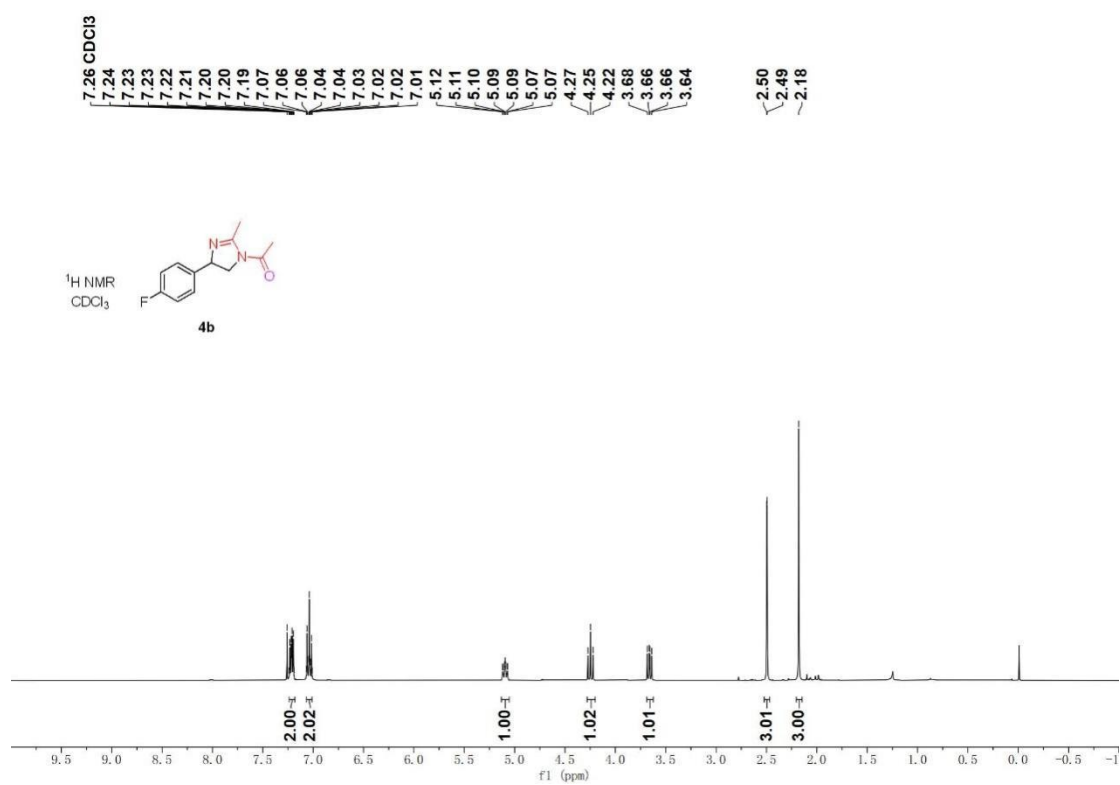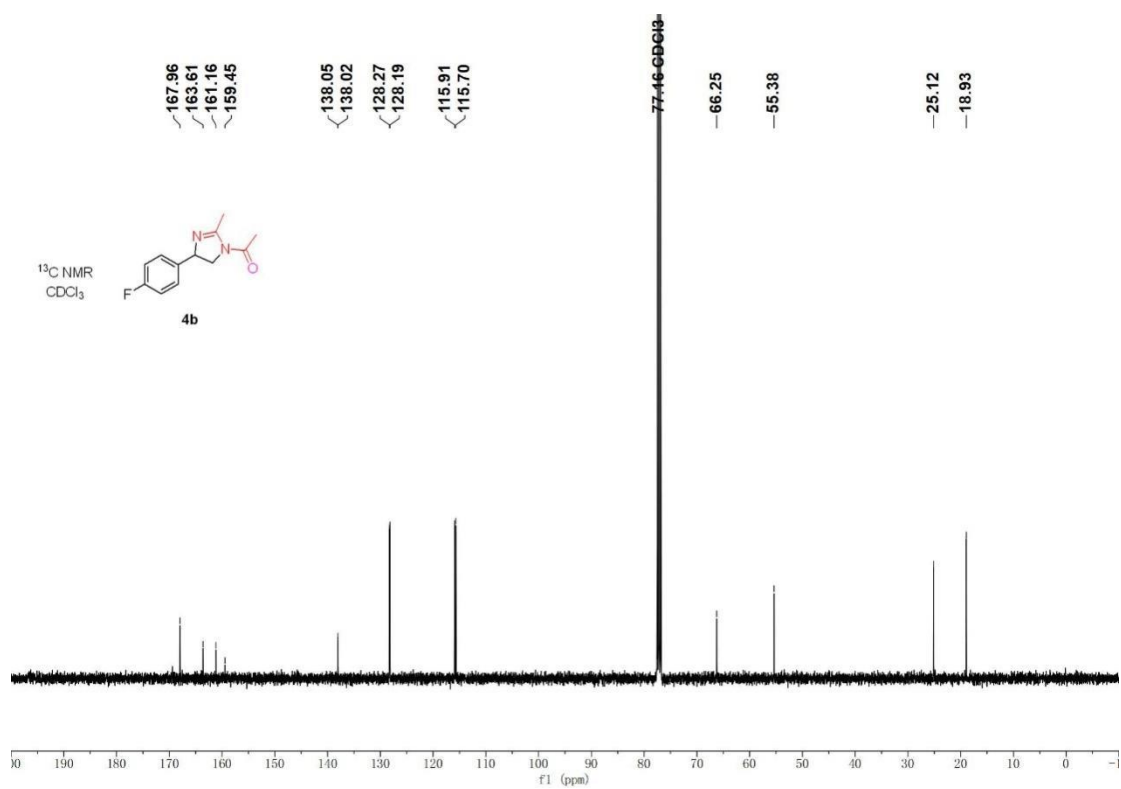

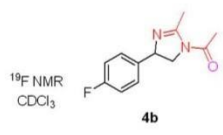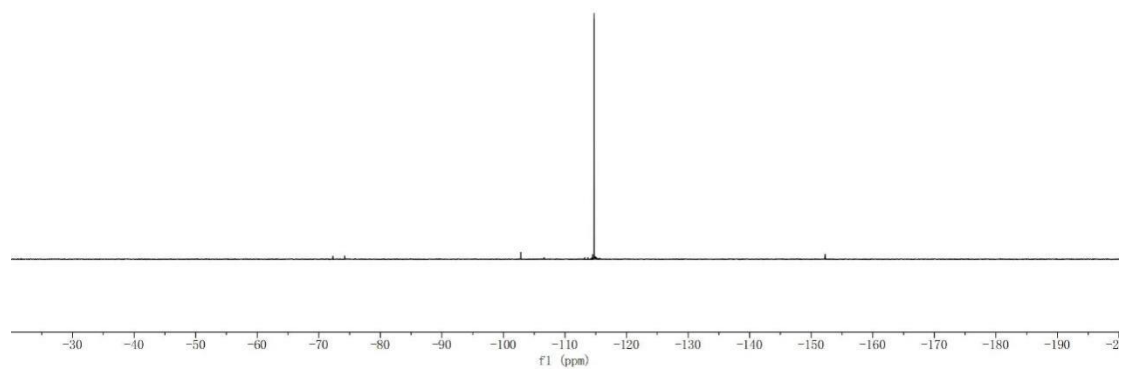

1-(4-(4-chlorophenyl)-2-methyl-4,5-dihydro-1H-imidazol-1-yl) ethan-1-one (**4c**)

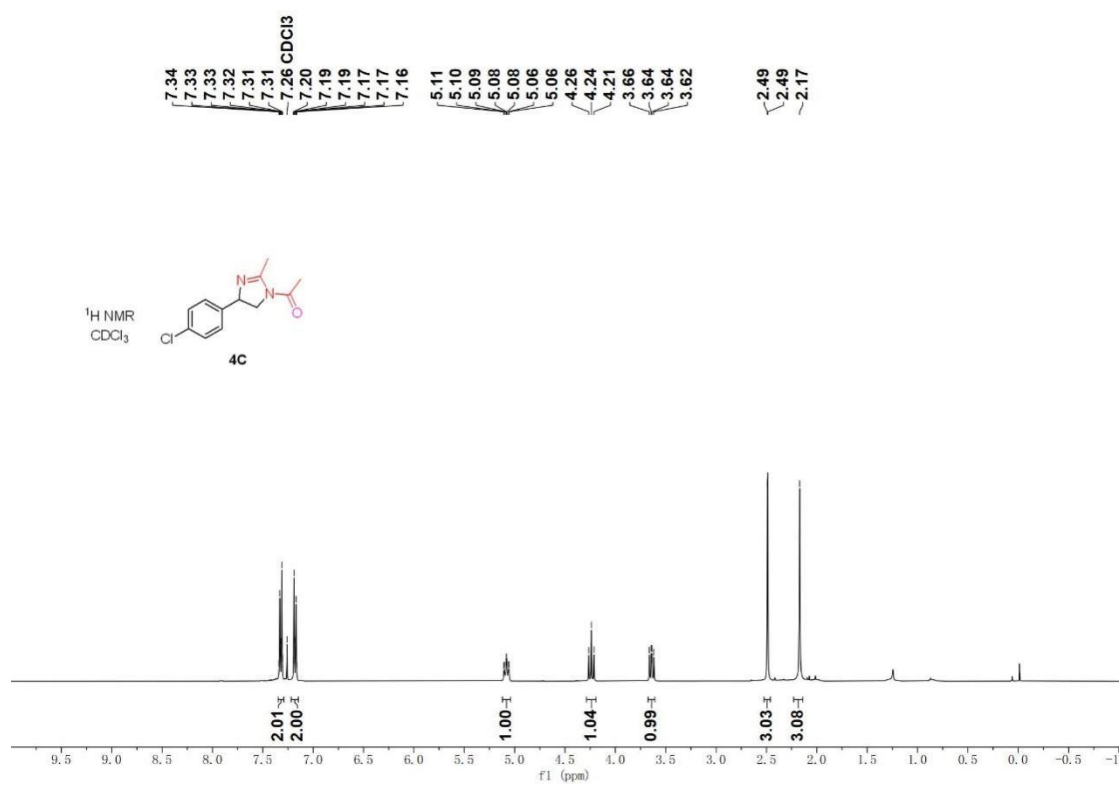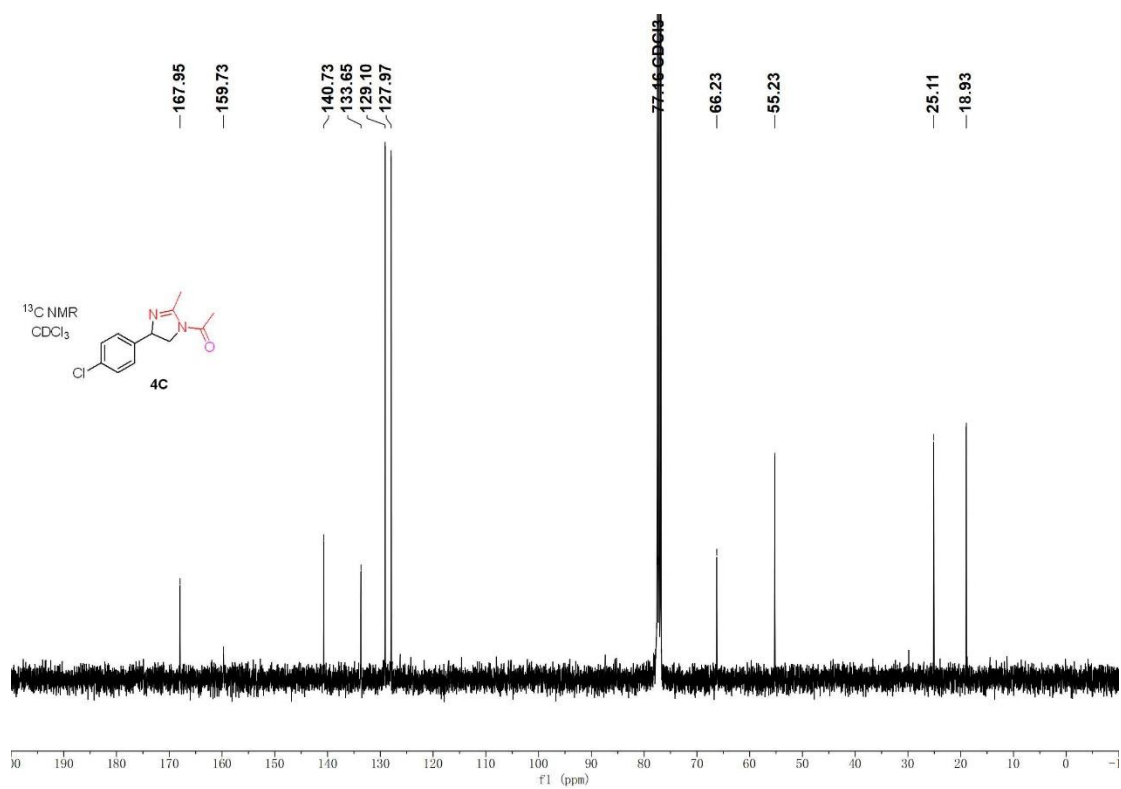

1-(2-methyl-4-(4-(trifluoromethyl) phenyl)-4,5-dihydro-1H-imidazol-1-yl) ethan-1-one (**4d**)

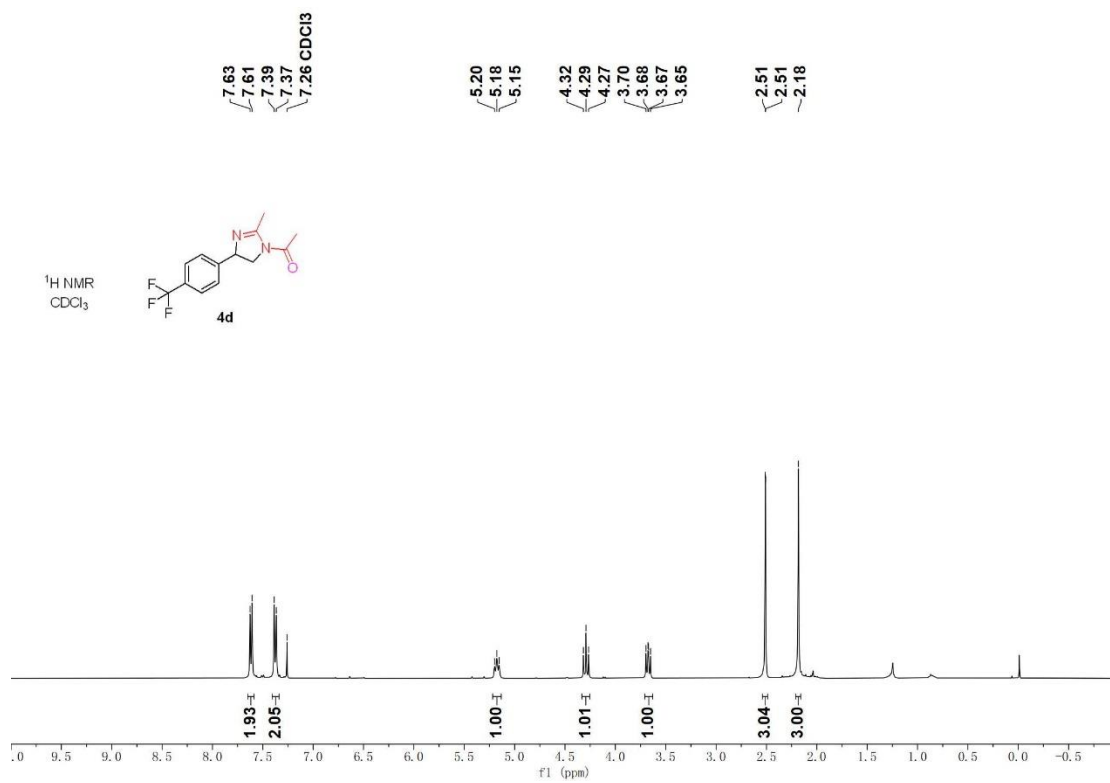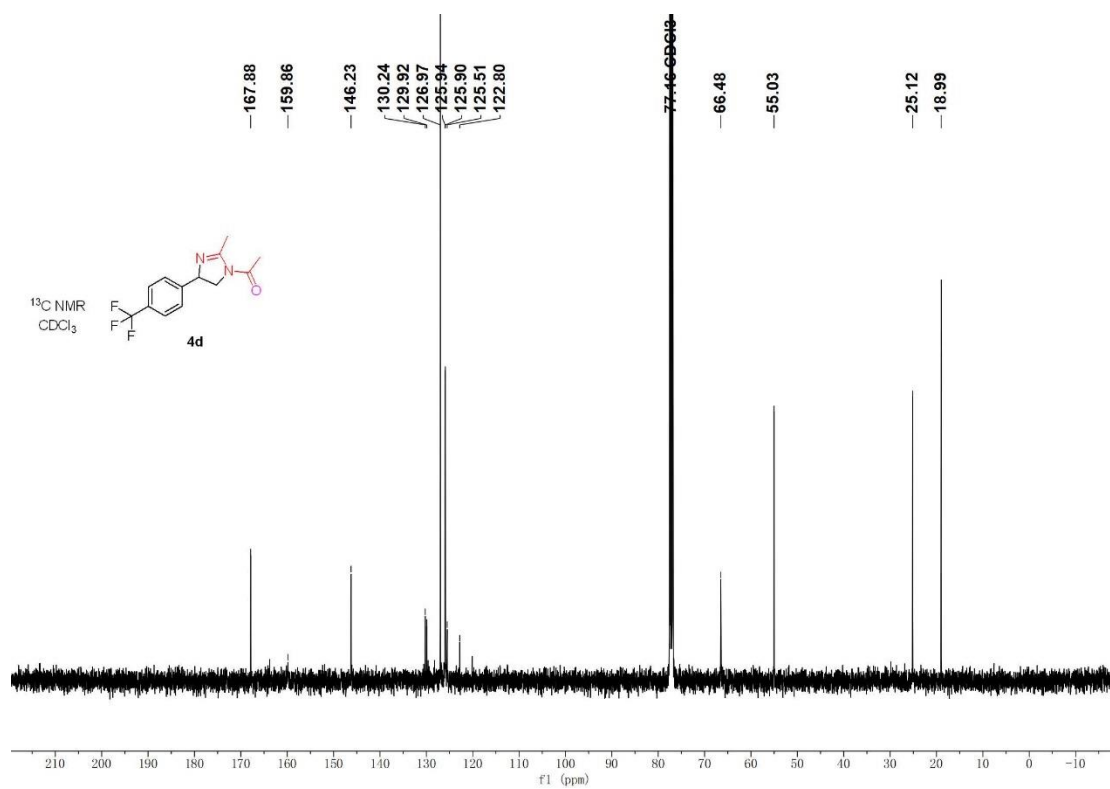



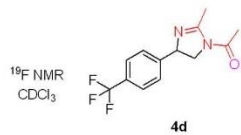

---62.51

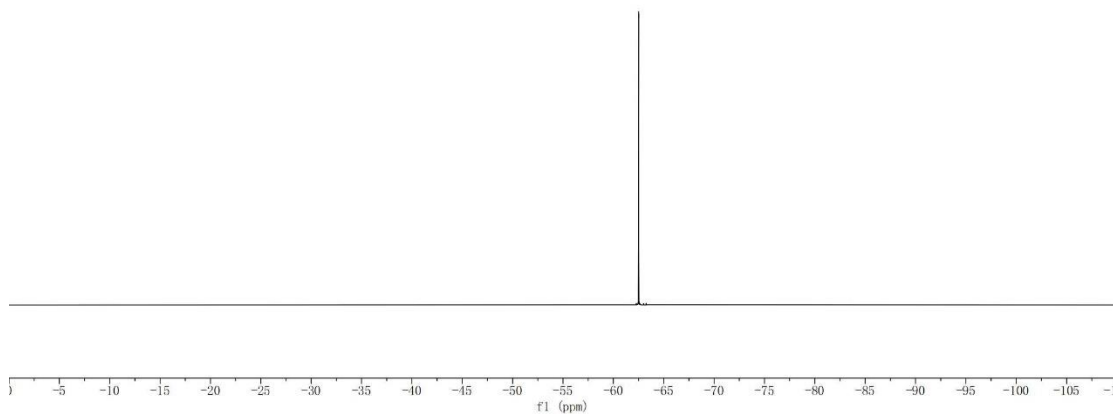

1-(4-(4-(chloromethyl) phenyl)-2-methyl-4,5-dihydro-1H-imidazol-1-yl) ethan-1-one (4e)

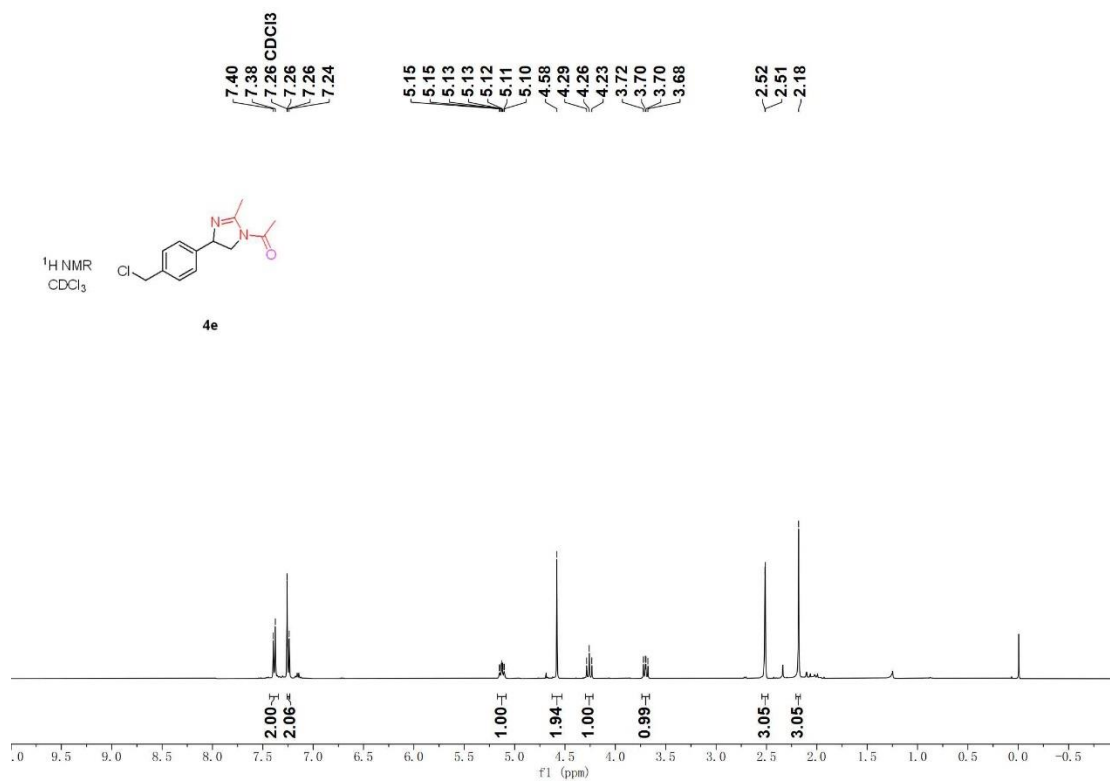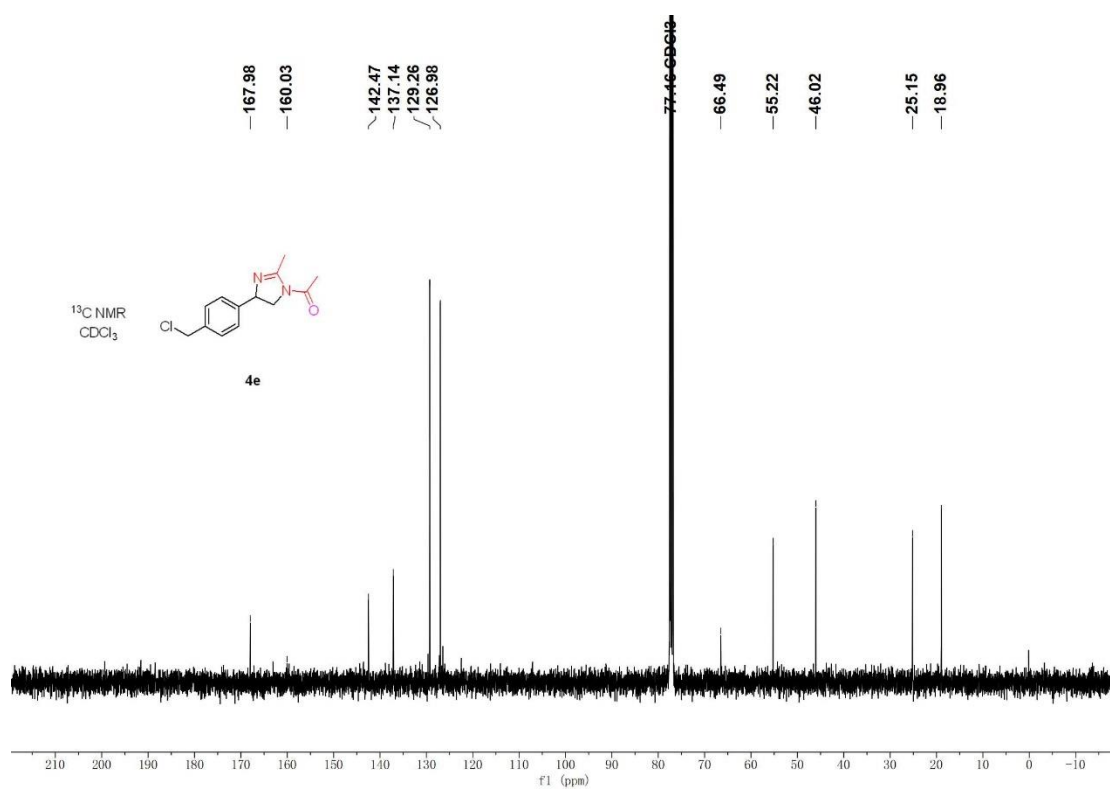

1-(4-(3-fluorophenyl)-2-methyl-4,5-dihydro-1H-imidazol-1-yl) ethan-1-one (4f)

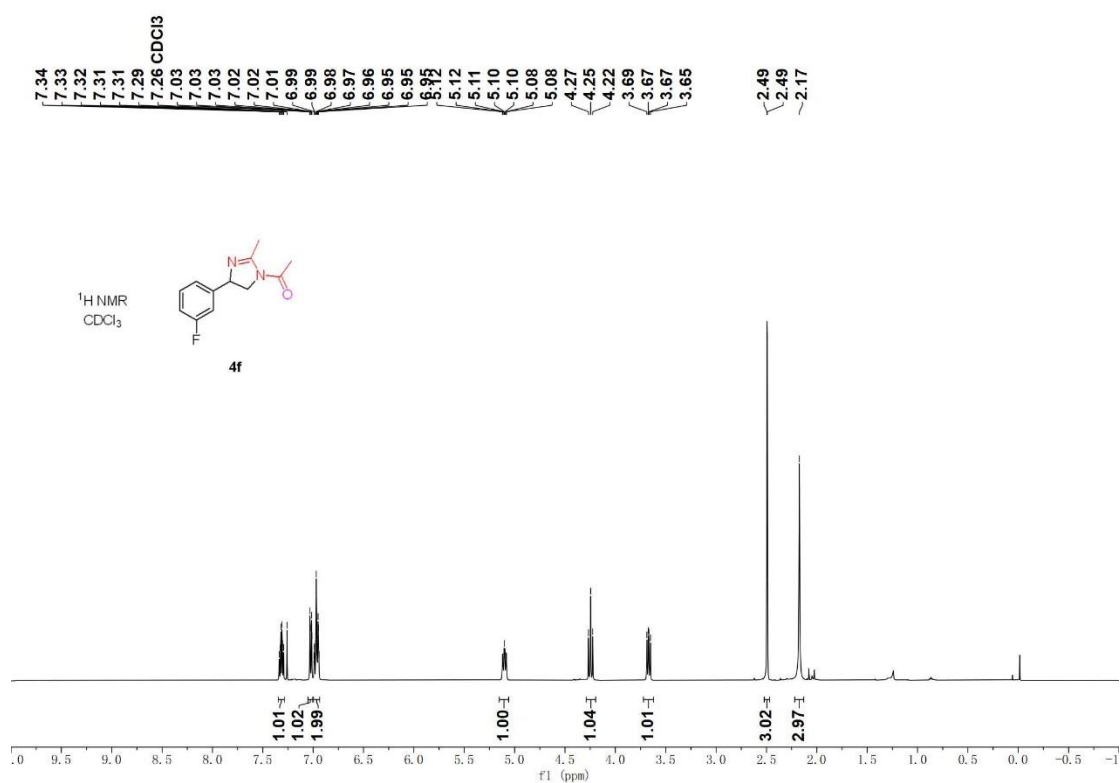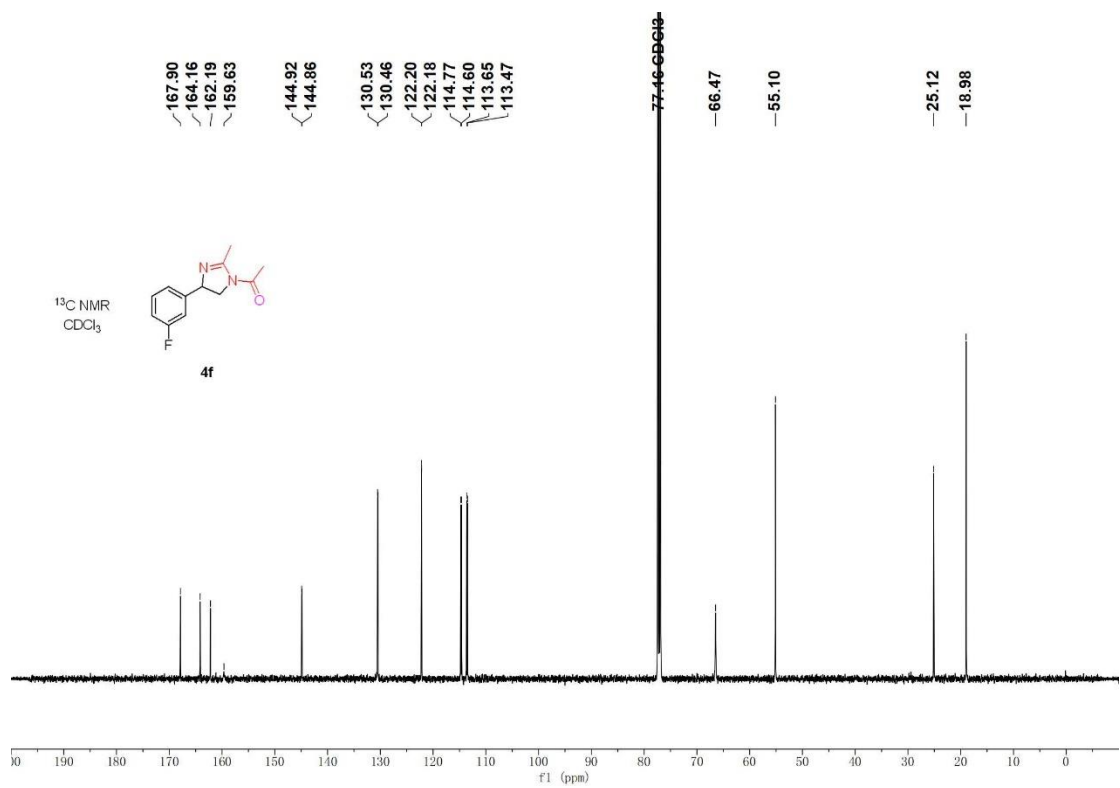

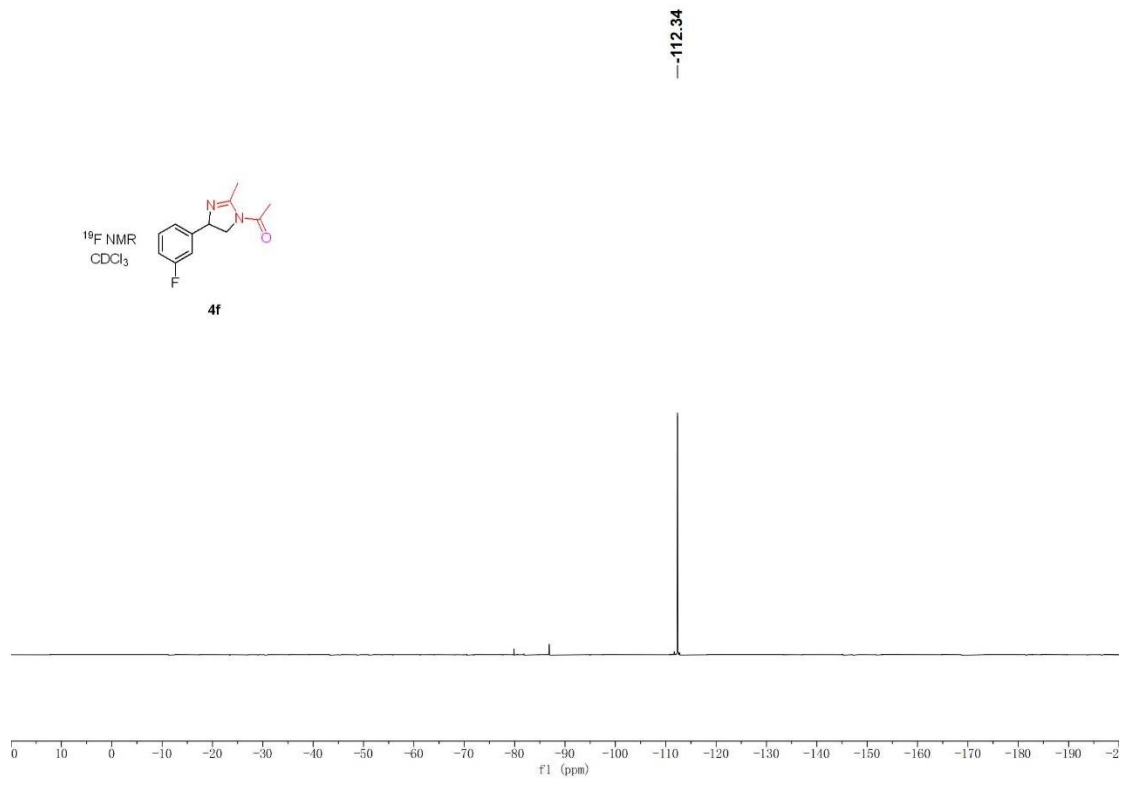

1-(4-(3-bromophenyl)-2-methyl-4,5-dihydro-1H-imidazol-1-yl) ethan-1-one (**4g**)

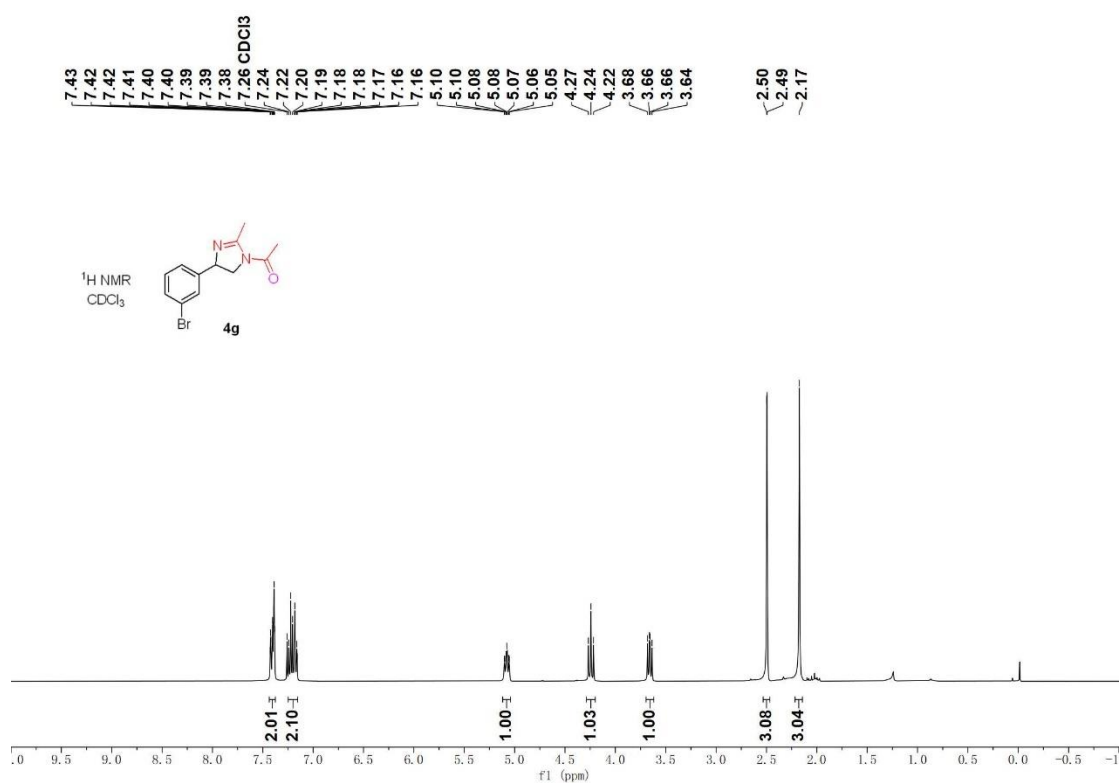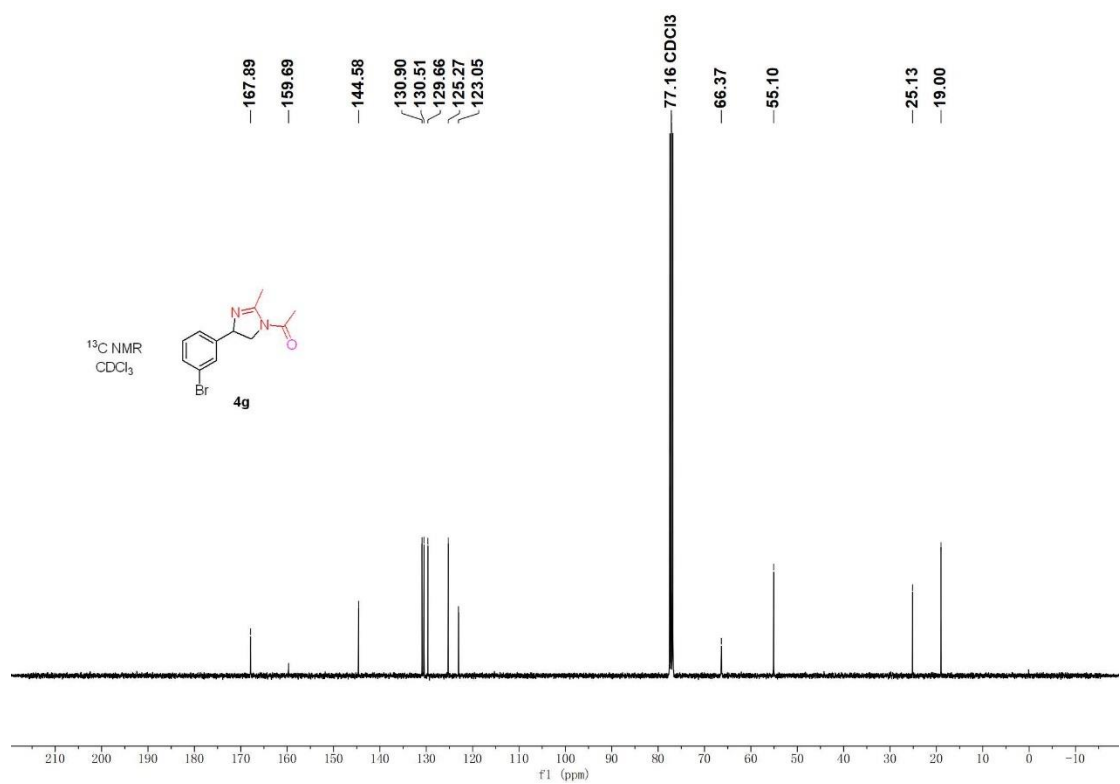

1-(4-(3-chlorophenyl)-2-methyl-4,5-dihydro-1H-imidazol-1-yl) ethan-1-one(4h)

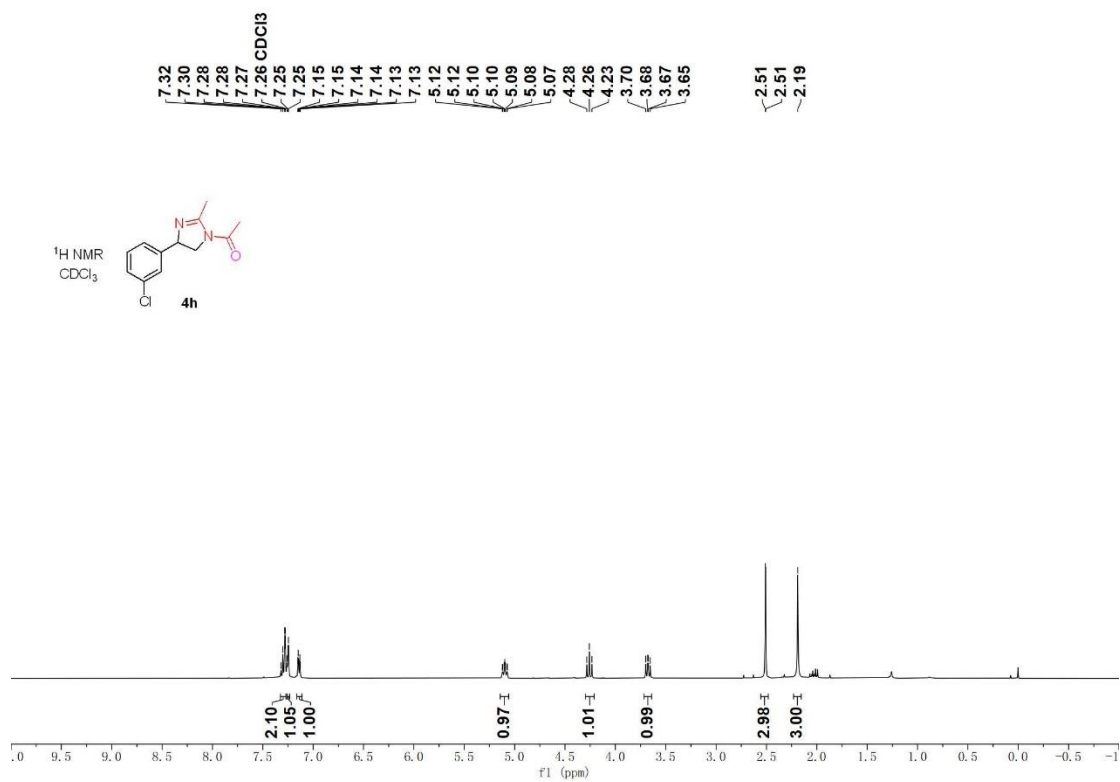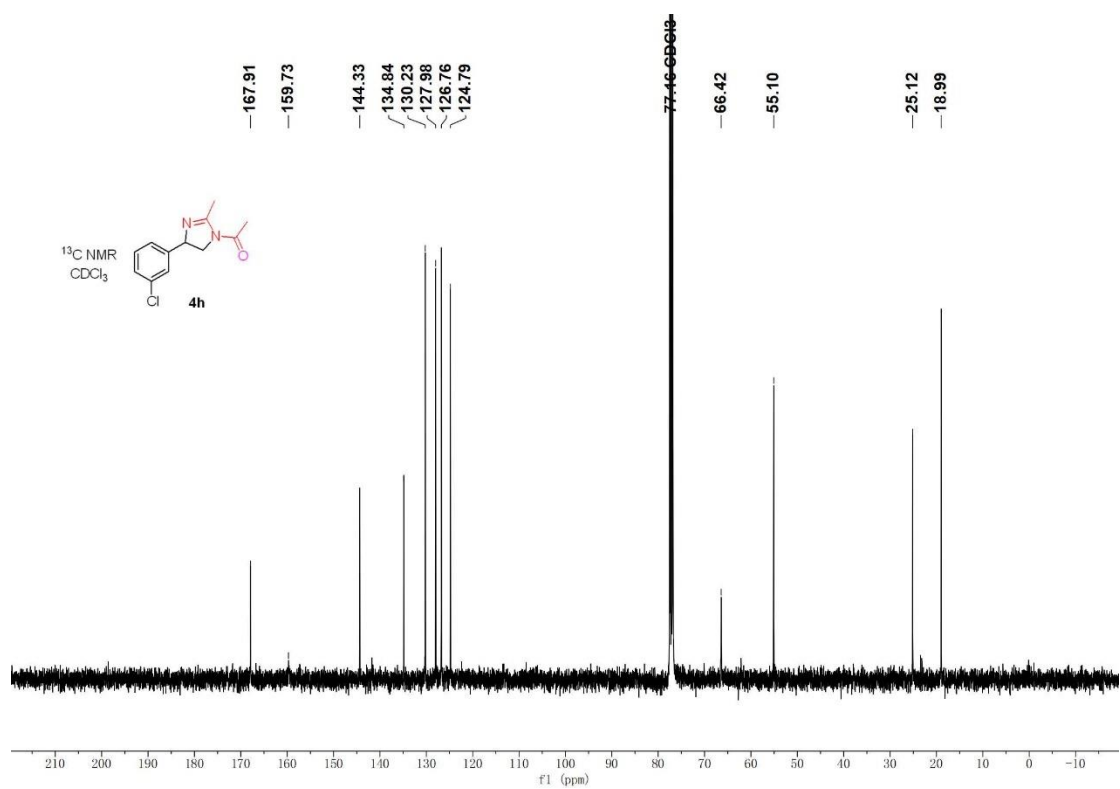

1-(4-(2,6-dichlorophenyl)-2-methyl-4,5-dihydro-1H-imidazol-1-yl) ethan-1-one (**4i**)

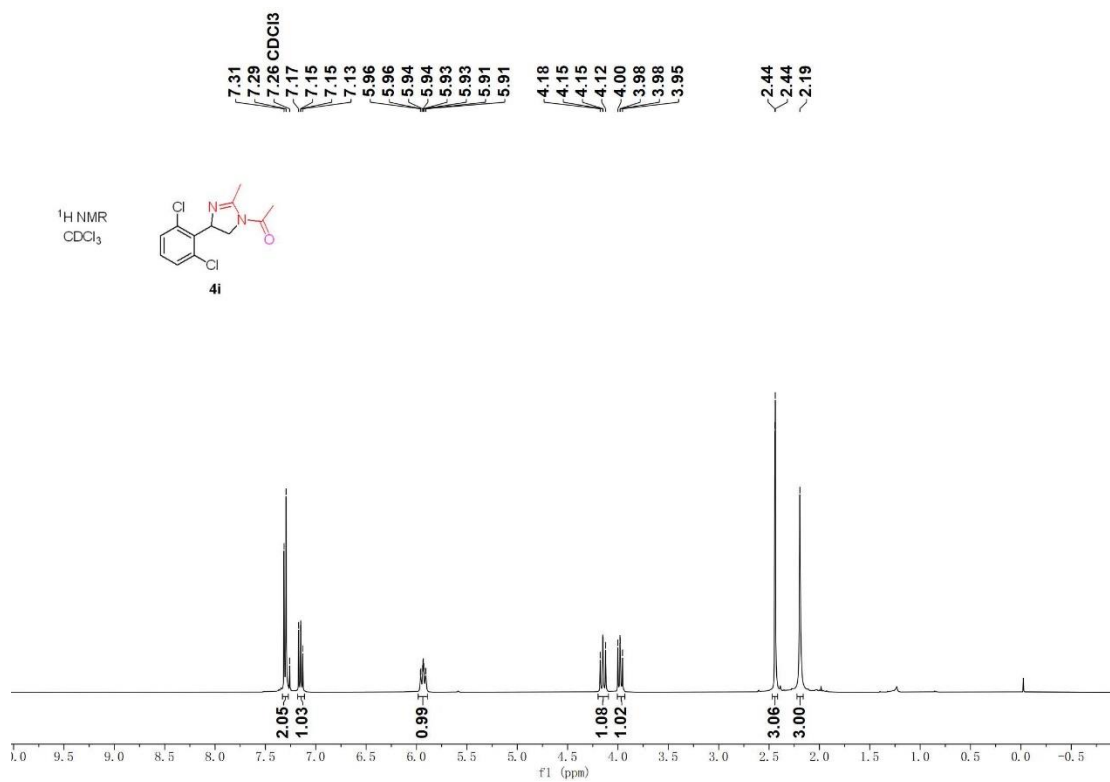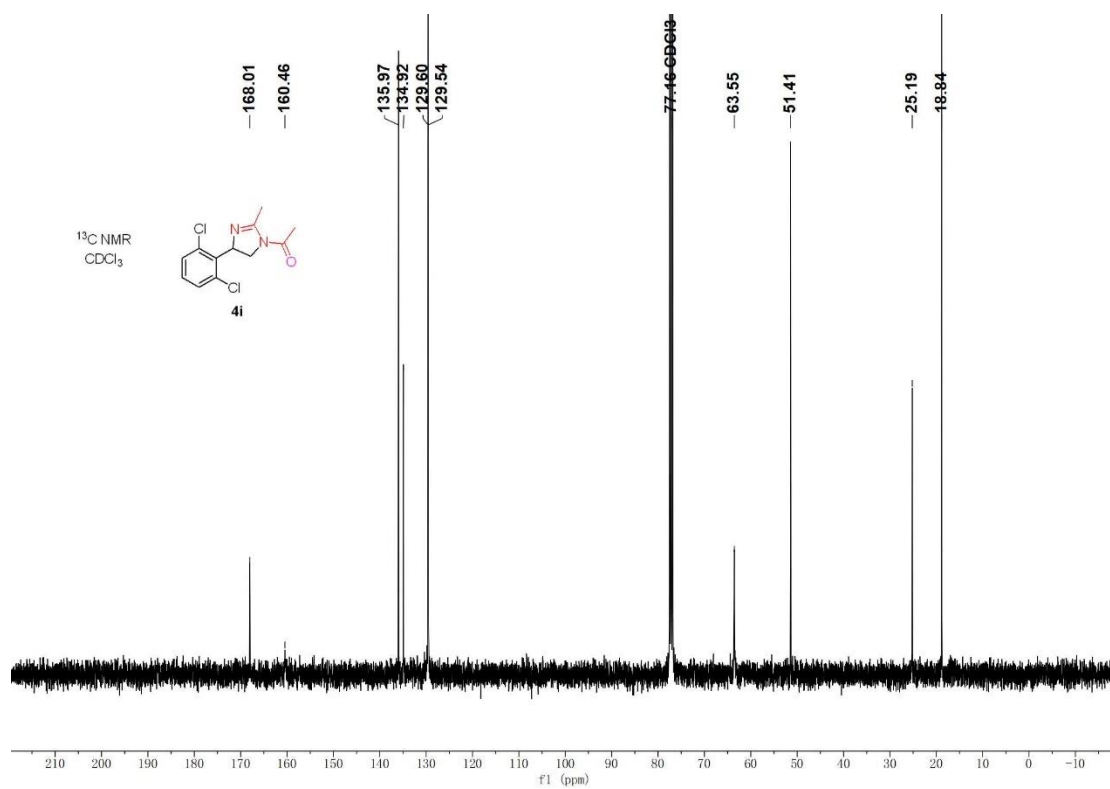

1-(4-(2-chlorophenyl)-2-methyl-4,5-dihydro-1H-imidazol-1-yl) ethan-1-one(4j)

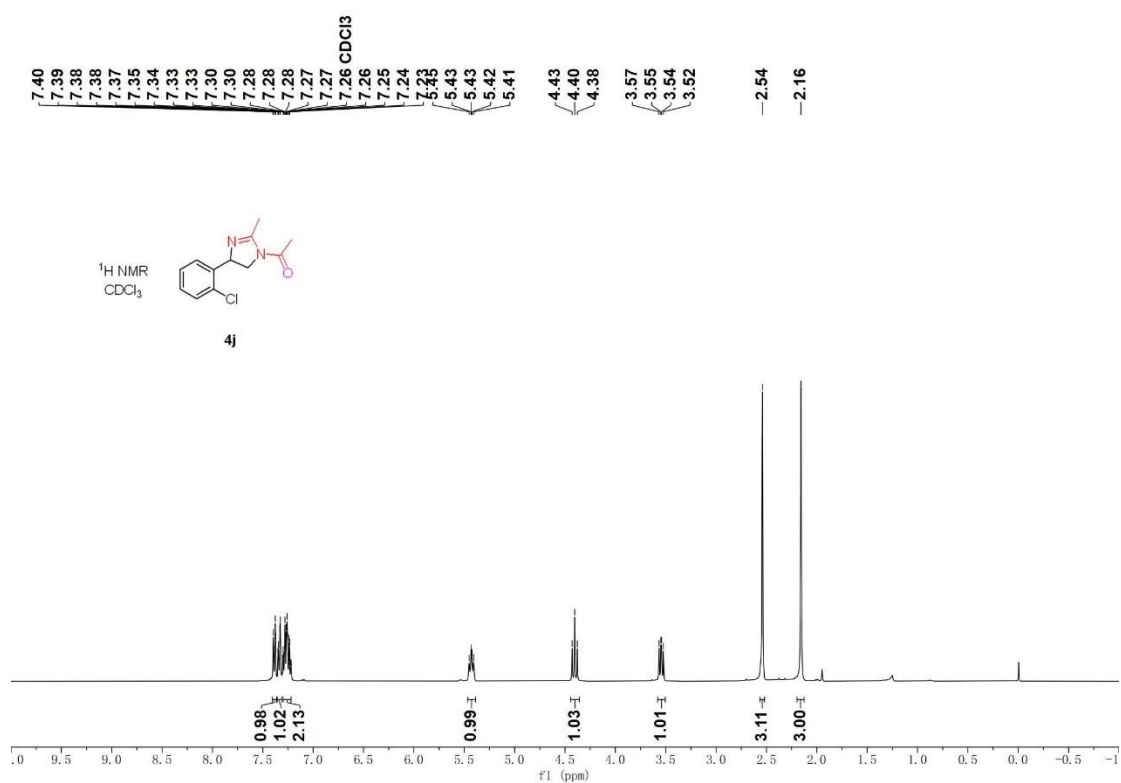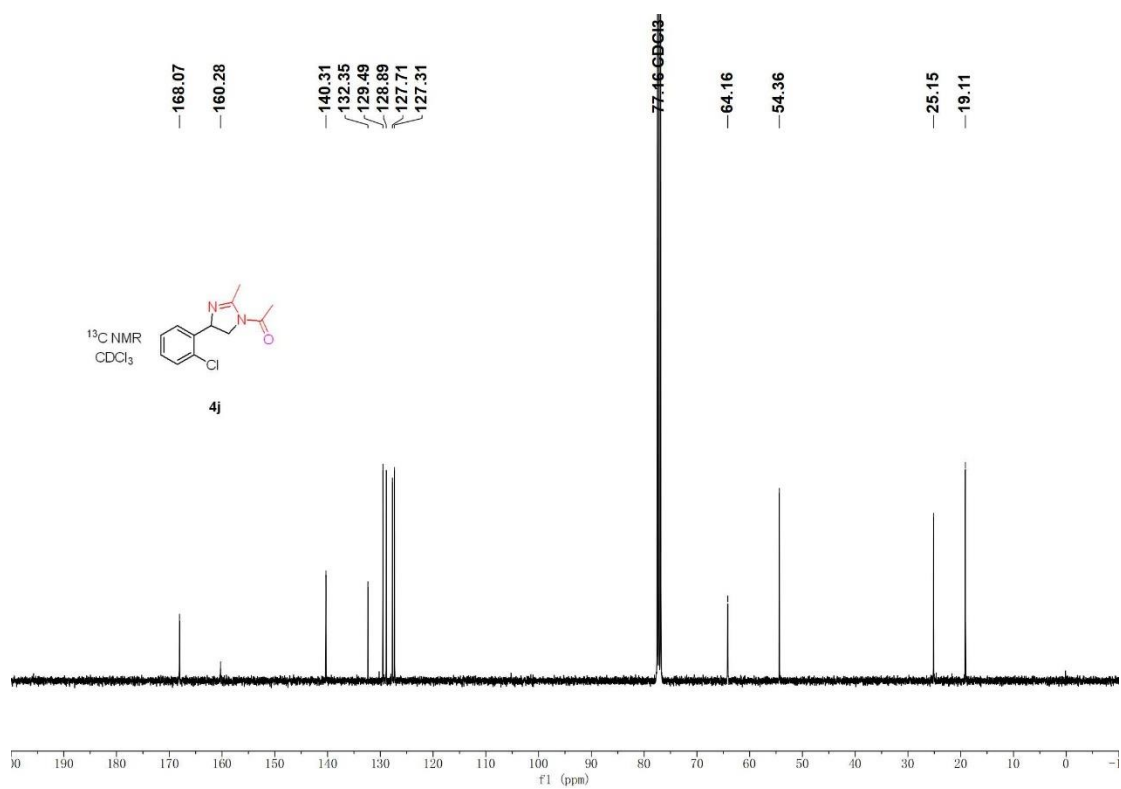



1-(4-(2-bromophenyl)-2-methyl-4,5-dihydro-1H-imidazol-1-yl) ethan-1-one (**4k**)

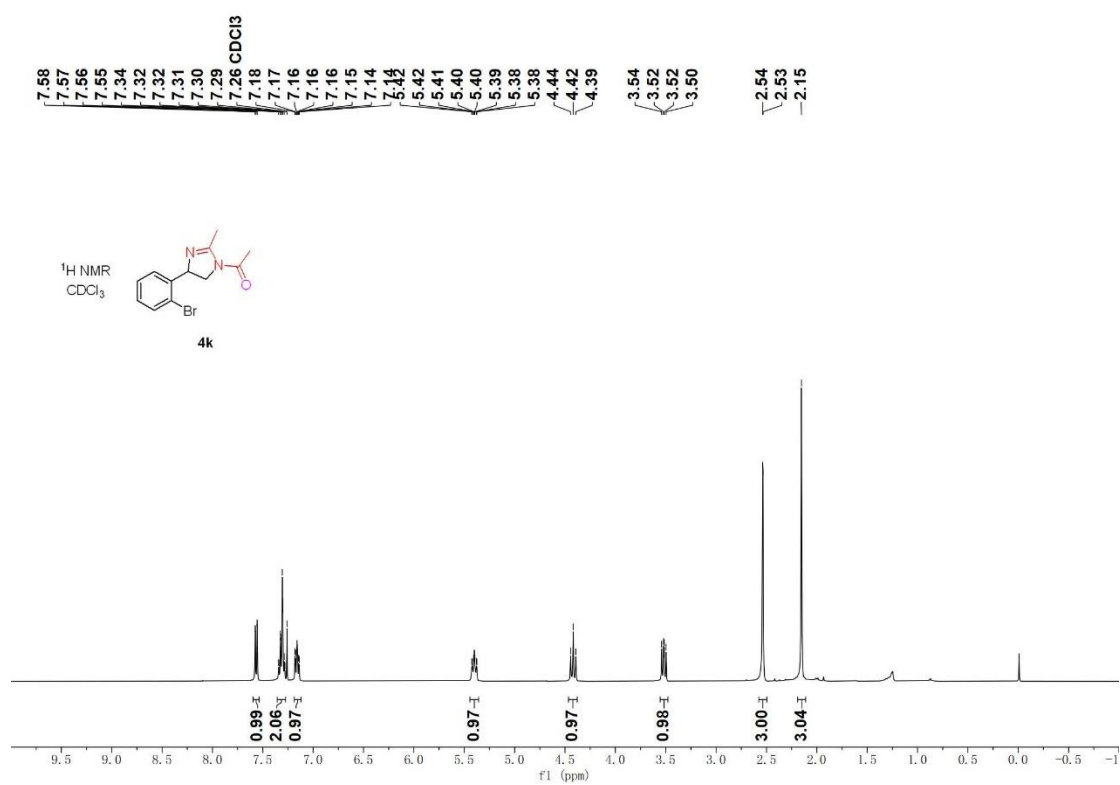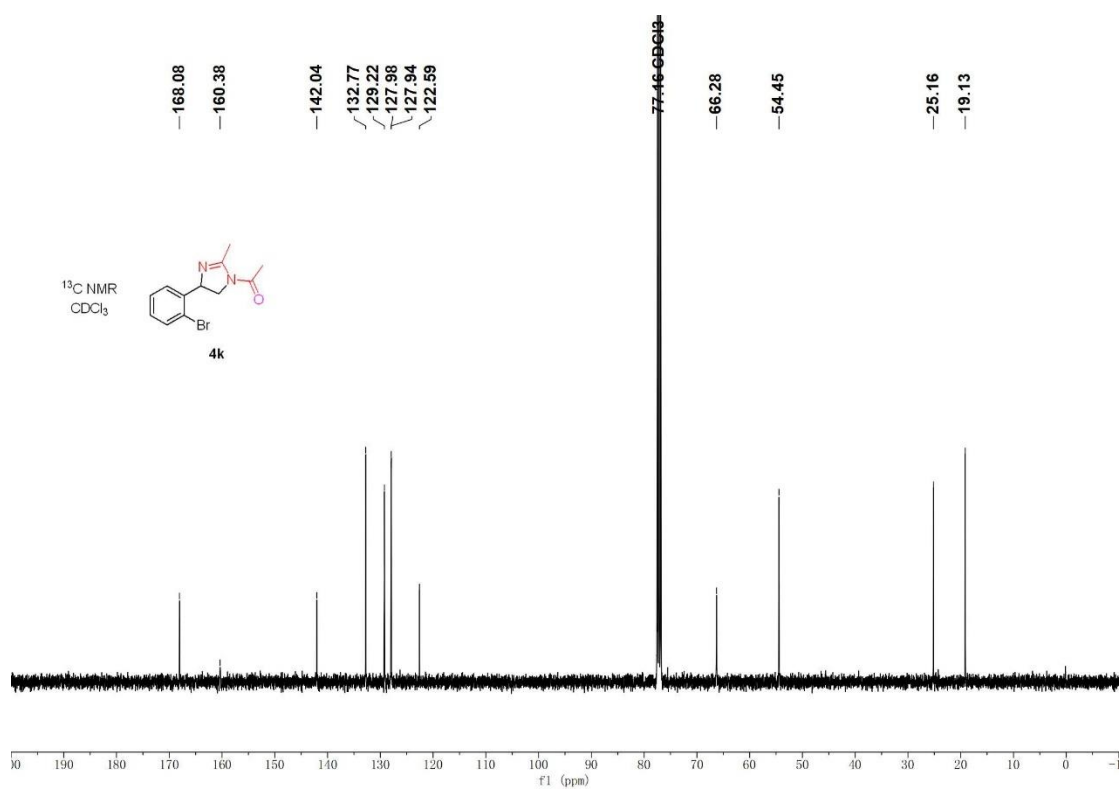

1-(2-methyl-4-(2-(trifluoromethyl) phenyl)-4,5-dihydro-1H-imidazol-1-yl) ethan-1-one (4I)

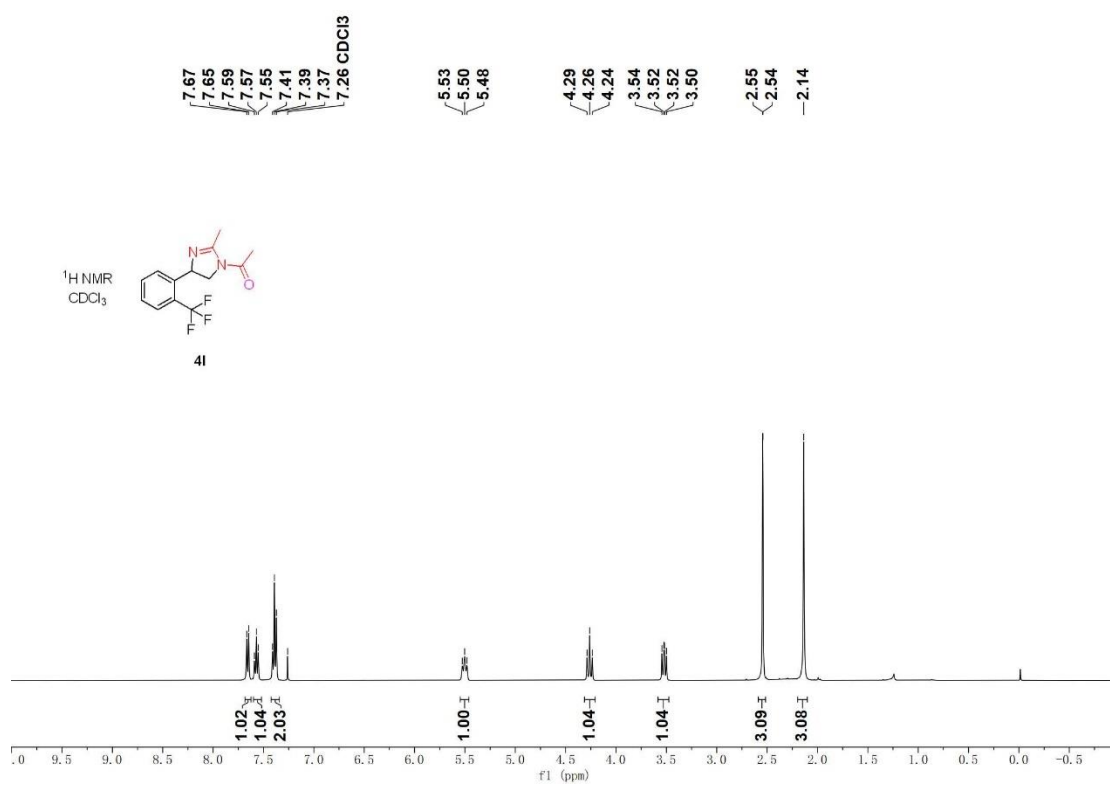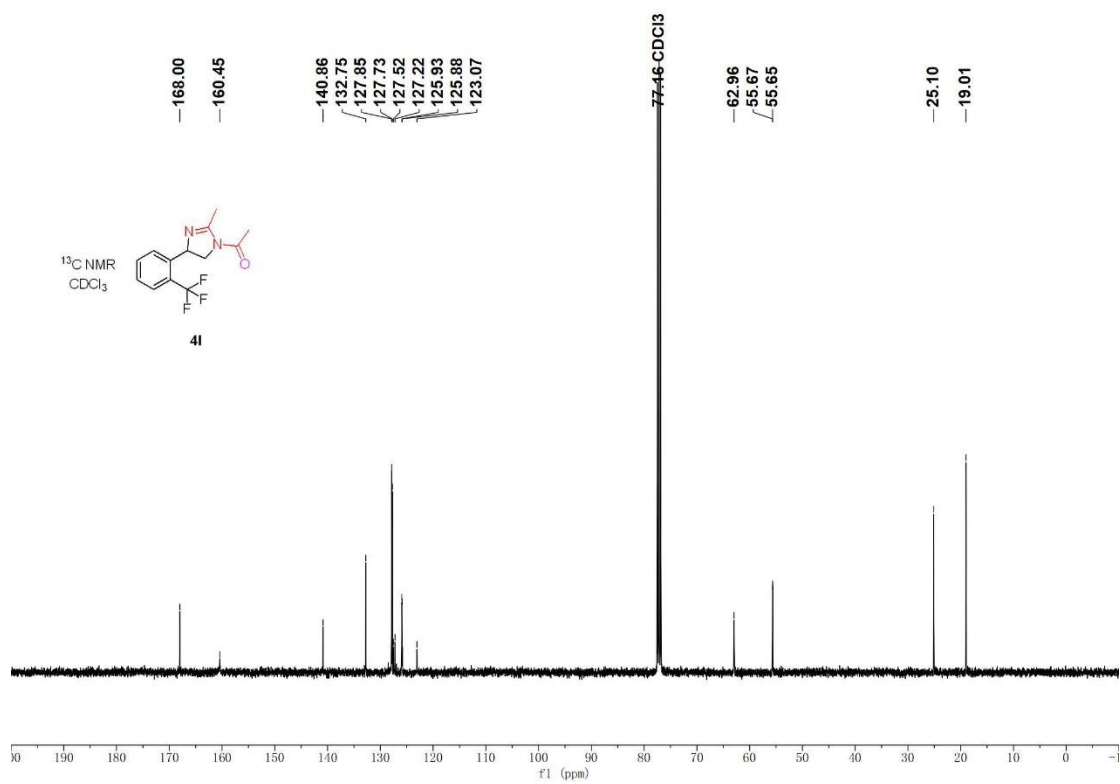

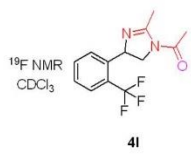

-58.91

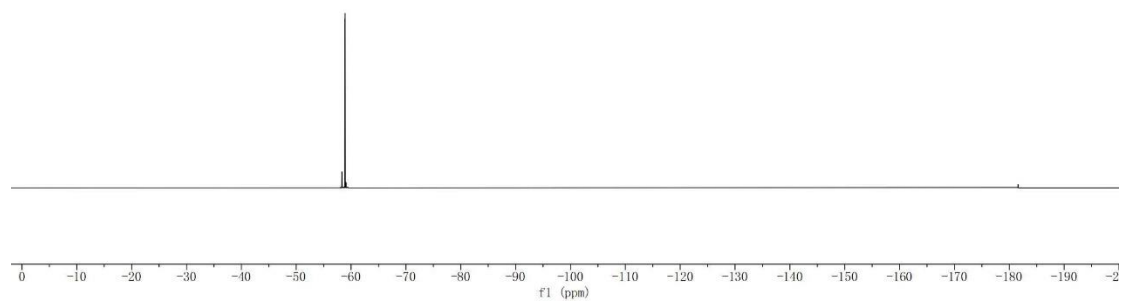

1-(2-methyl-4-(m-tolyl)-4,5-dihydro-1H-imidazol-1-yl) ethan-1-one (**4m**)

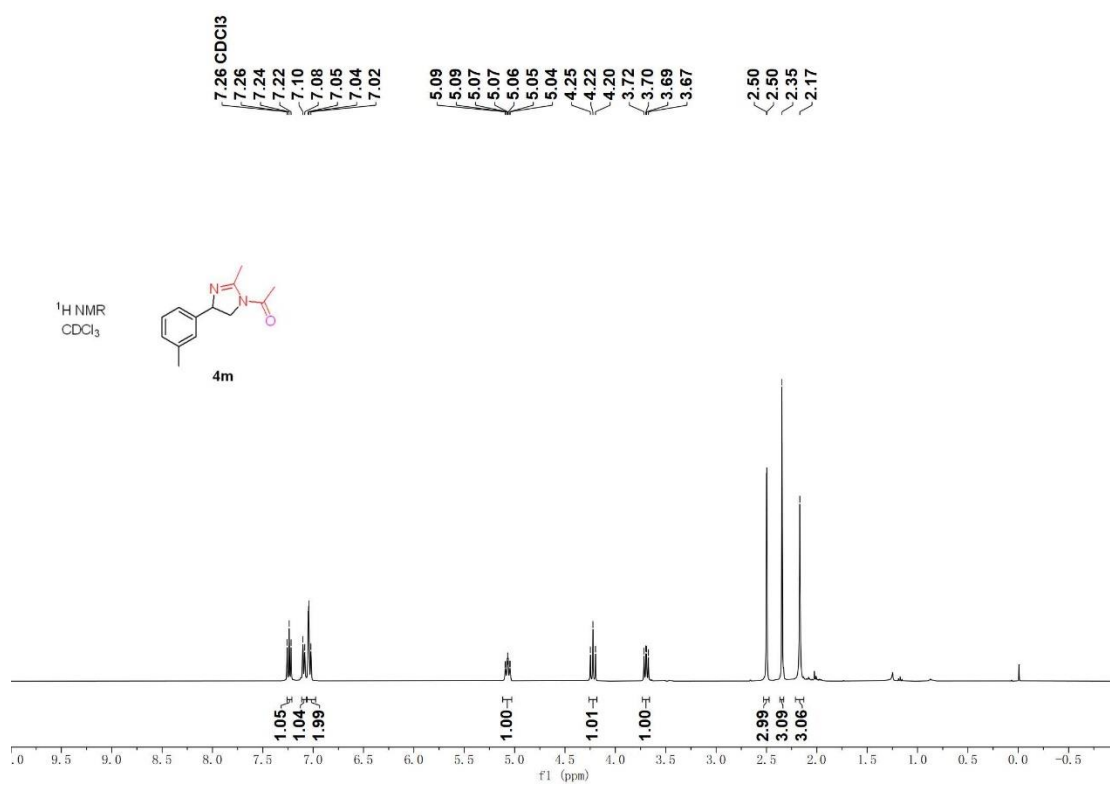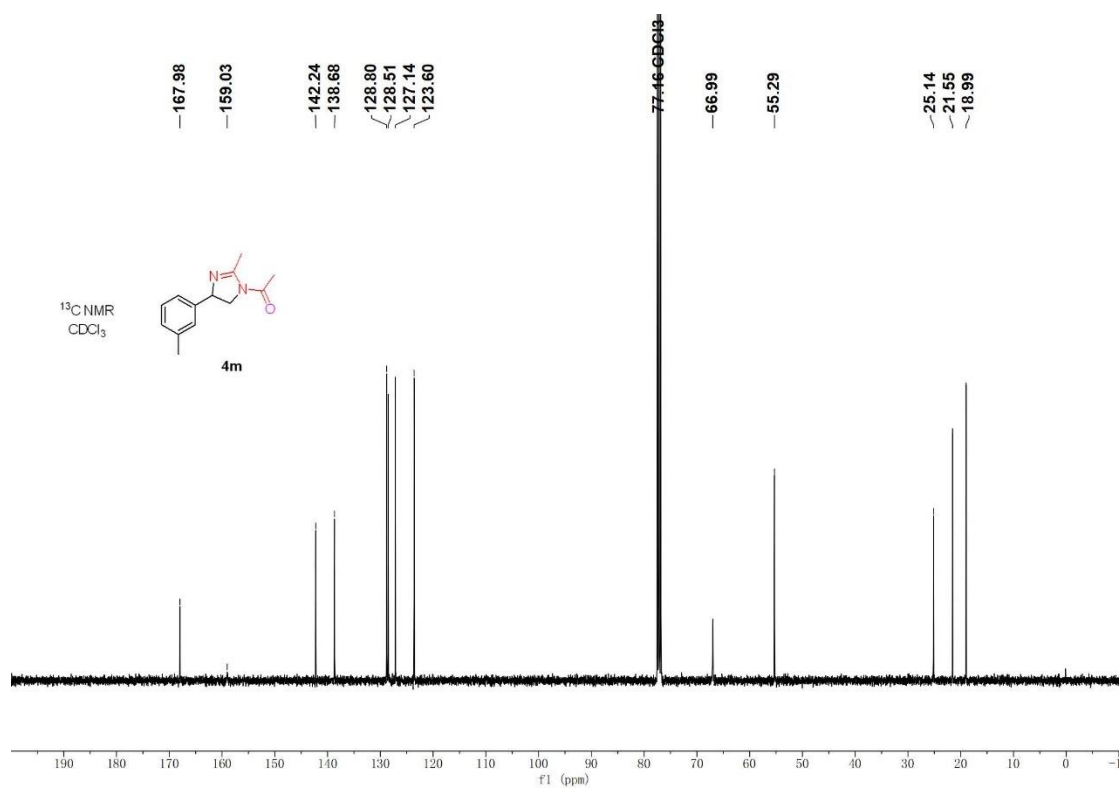

1-(2-methyl-4-(o-tolyl)-4,5-dihydro-1H-imidazol-1-yl) ethan-1-one (**4n**)

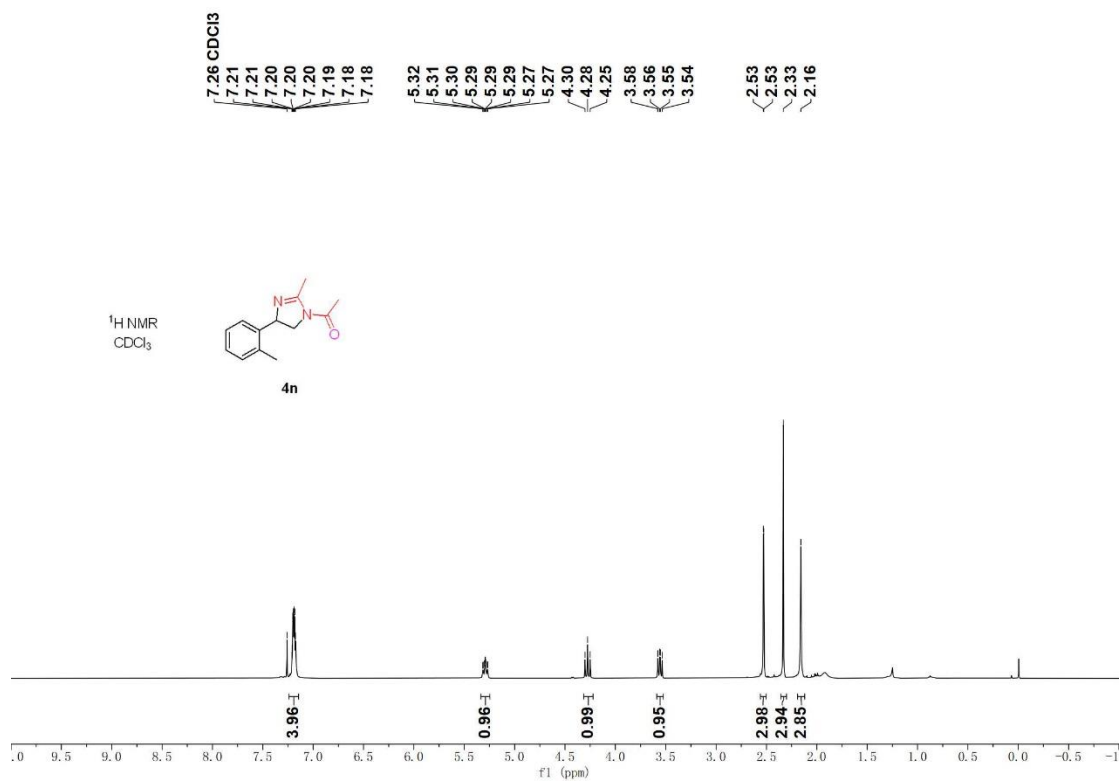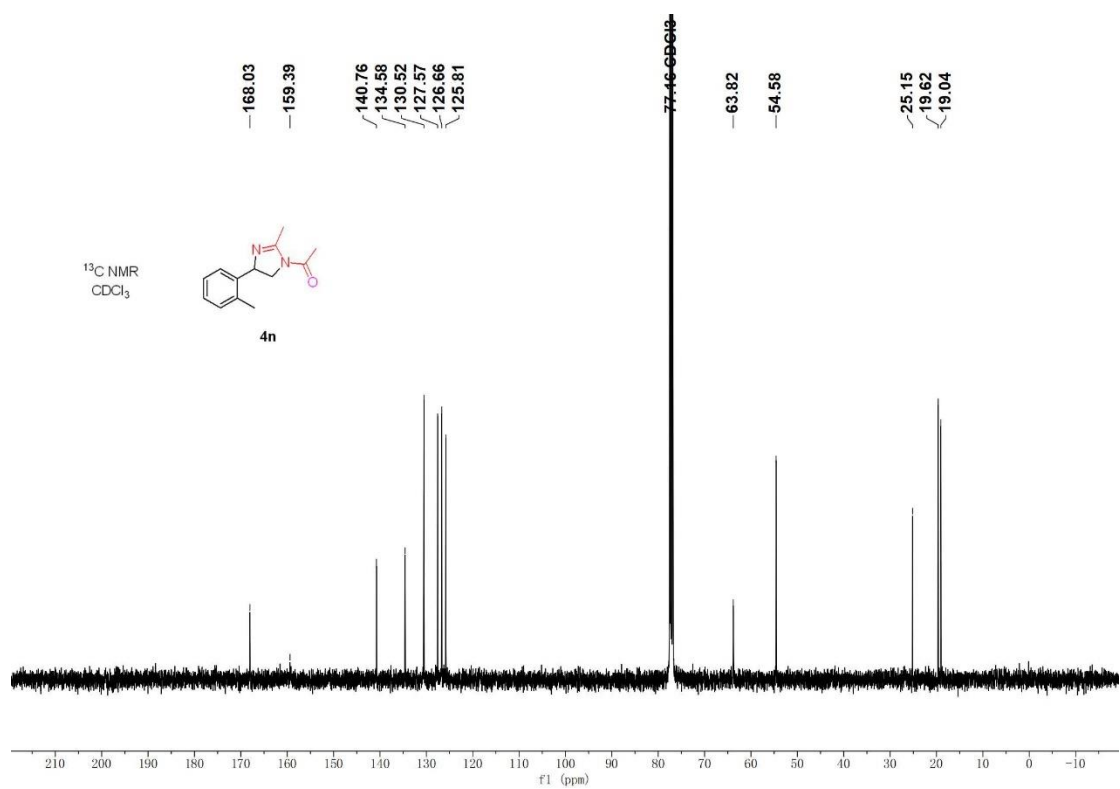

2-phenylpropane-1,2-diamine (**2aaa**)

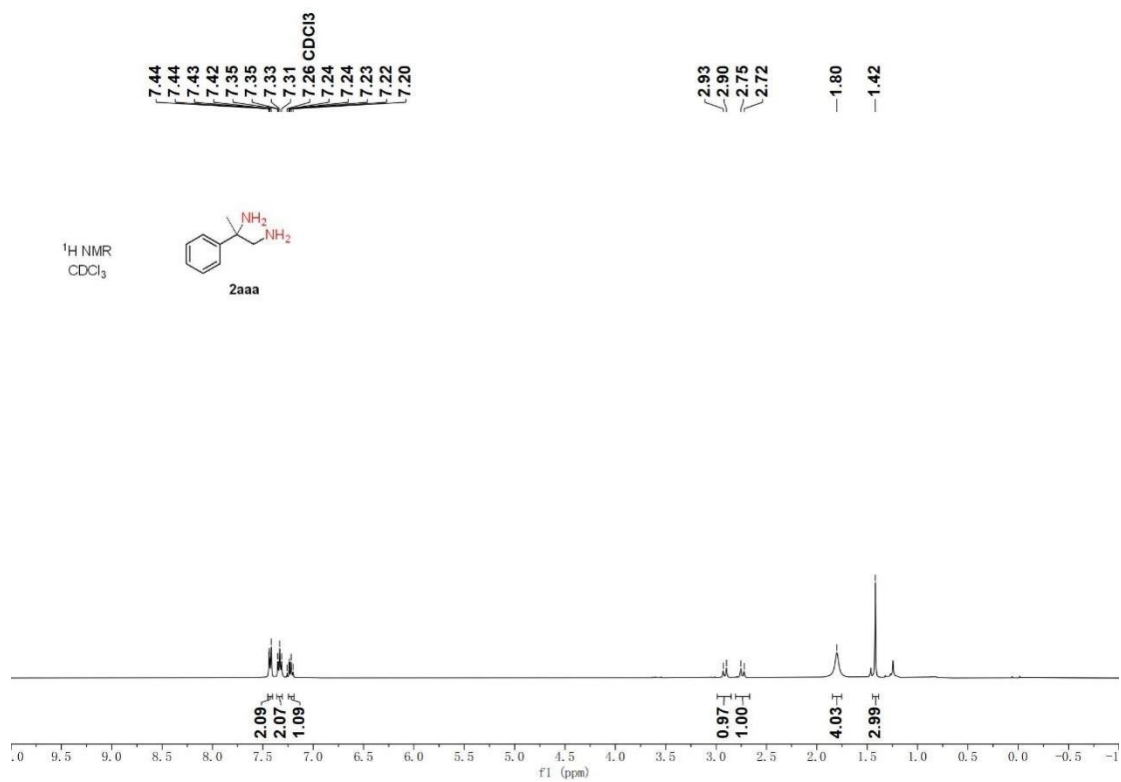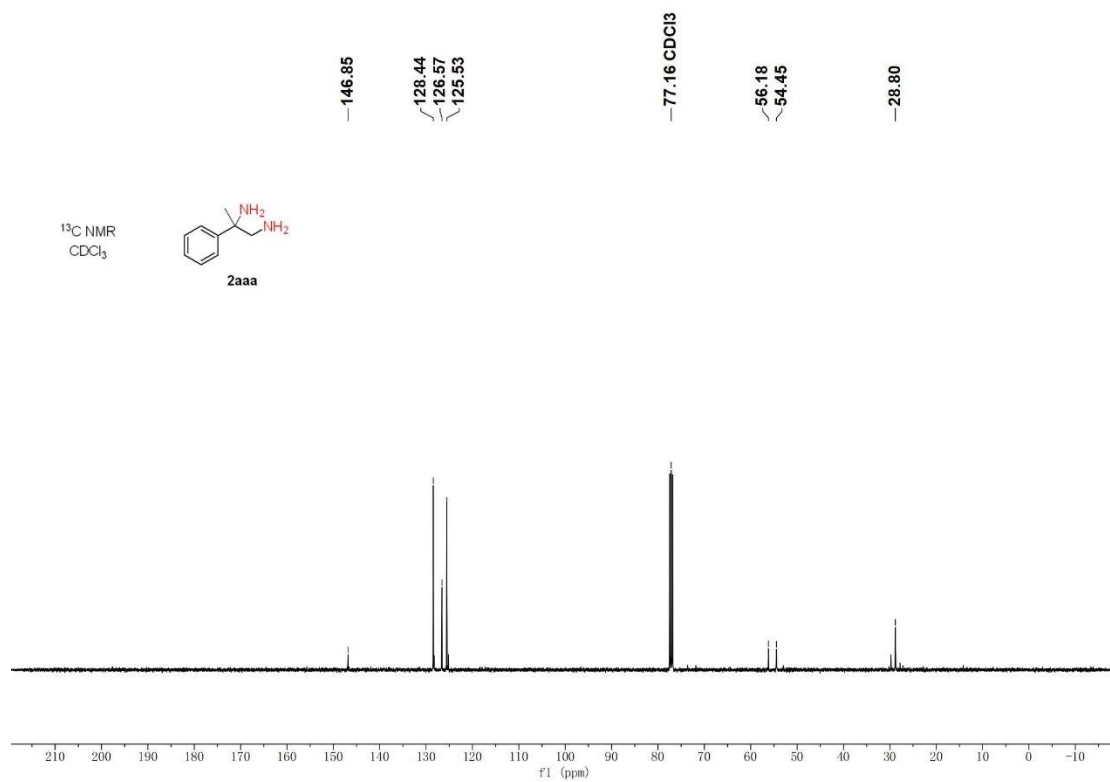

4-(1-acetyl-2-methyl-4,5-dihydro-1H-imidazol-4-yl) benzyl (tert-butoxycarbonyl) glycinate (**4ee**)

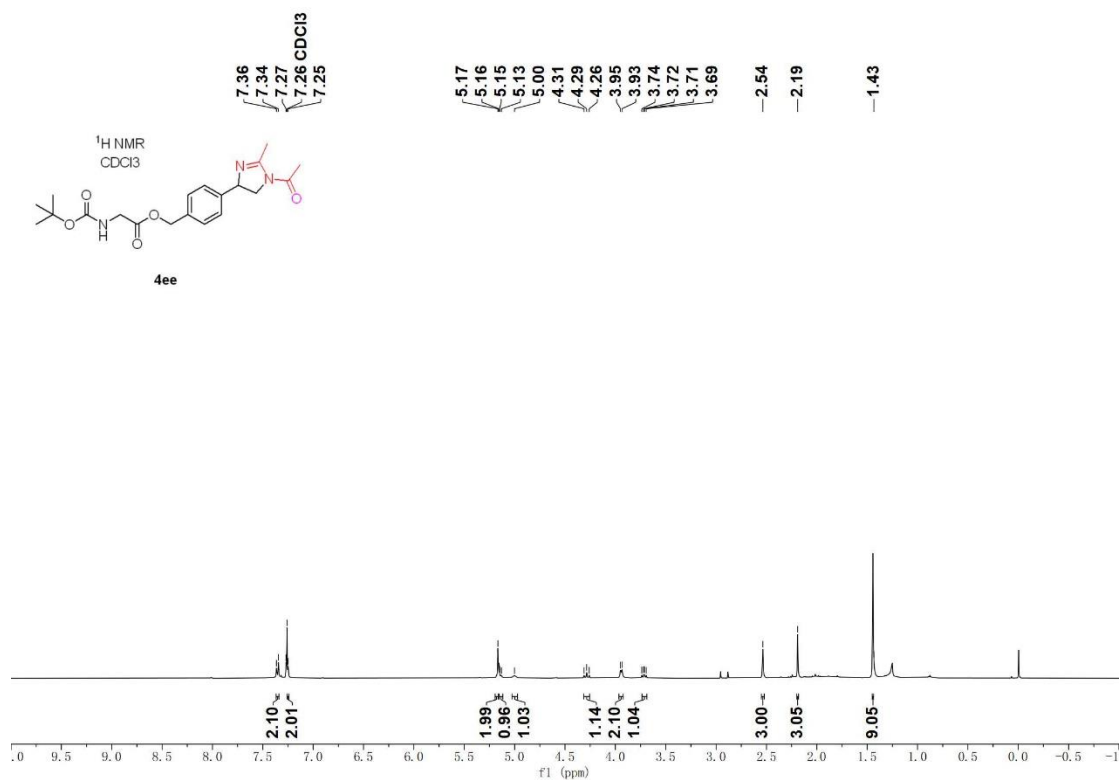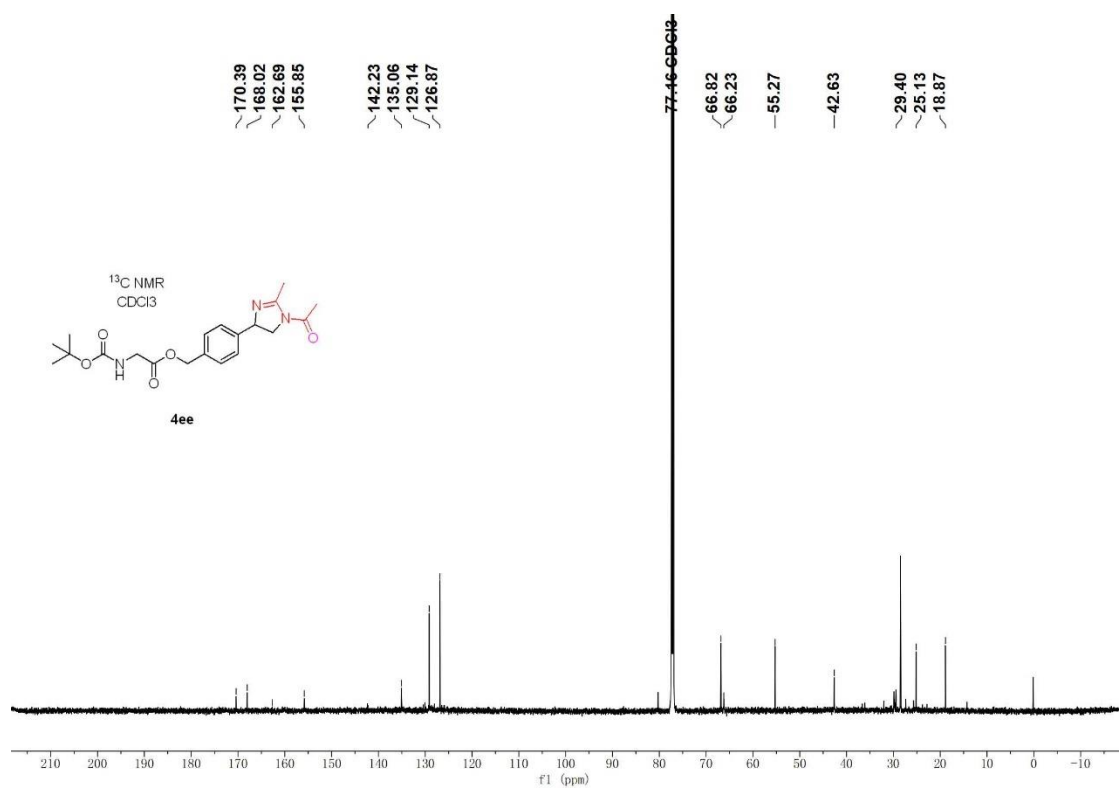

## 10. Reference

- (1) (a) M. T. Chin, T. Yang, K. P. Quirion, C. Lian, P. Liu, J. He and T. Diao. Implementing a Doping Approach for Poly (methyl methacrylate) Recycling in a Circular Economy. *J. Am. Chem. Soc.*, 2024, **146**, 5786–5792; (b) X. Mao, M.-M. Li, P. Wang, Q. Cao, W. Zhou and W. Ding. Transition-Metal-Free Anti-Markovnikov Hydroarylation of Alkenes with Aryl Chlorides through Consecutive Photoinduced Electron Transfer. *Org. Lett.*, 2024, **26**, 1265–1270.
- (2) Sheldrick, G. M. Wisconsin, USA. SHELXTL; Siemens analytical X-ray systems: madison.
